# Supplementary material for: KRAS mutations and endometriosis burden of disease
Source: PubMed Central journal article supplement (PMC10240146; doi:10.1002/cjp2.317), 2023-03-28
Supplement: CJP2-9-302-s001.pdf [file CJP2-9-302-s001.pdf]

## **KRAS mutations and endometriosis burden of disease**

NL Orr *et al. J Pathol Clin Res* <https://doi.org/10.1002/cjp2.317>

### **Supplementary Material**

Reference numbers refer to the list in the main paper

#### **Contents**

|                                                                                                                                                           |    |
|-----------------------------------------------------------------------------------------------------------------------------------------------------------|----|
| Supplementary Materials and Methods.....                                                                                                                  | 2  |
| <i>Primer and probe sequences</i> .....                                                                                                                   | 2  |
| <i>Pre-amplification and droplet digital PCR – reaction procedure</i> .....                                                                               | 2  |
| <i>Threshold for ddPCR</i> .....                                                                                                                          | 3  |
| Supplementary Figures.....                                                                                                                                | 4  |
| <i>Figure S1. Study flowchart</i> .....                                                                                                                   | 4  |
| <i>Figure S2. Multiplex assay with all six KRAS codon 12 positive controls, each with a unique clustering region</i> .....                                | 5  |
| <i>Figure S3. Kaplan Meier Survival Analysis</i> .....                                                                                                    | 6  |
| <i>Figure S4. Change in pain scores between baseline and follow-up, based on mutation status</i> .....                                                    | 7  |
| Supplementary Tables.....                                                                                                                                 | 8  |
| <i>Table S1. Comparison between manual microdissection and laser capture microdissection</i> .....                                                        | 8  |
| <i>Table S2. Cell line controls</i> .....                                                                                                                 | 9  |
| <i>Table S3. Mean detection thresholds for the individual KRAS assays</i> .....                                                                           | 10 |
| <i>Table S4. Demographics</i> .....                                                                                                                       | 11 |
| <i>Table S5. Summary of mutation calls</i> .....                                                                                                          | 13 |
| <i>Table S6. The association between follow-up pain scores and KRAS mutation status, controlling for baseline pain severity – linear regression</i> ..... | 70 |

## Supplementary Materials and Methods

### Primer and probe sequences

| Primer              |                                        |                                         |                                        |                            |                                                |
|---------------------|----------------------------------------|-----------------------------------------|----------------------------------------|----------------------------|------------------------------------------------|
| Assay               | Description                            | Primer Sequence                         | Source                                 |                            |                                                |
| KRAS G12            | Forward                                | 5'-GCCTGCTGAAAATGACTGAATATAAAC T-3'     | Applied Biosystems, Inc., USA          |                            |                                                |
|                     | Reverse                                | 5'-GCTGTATCGTCAAGGCACTCTT -3'           | Applied Biosystems, Inc., USA          |                            |                                                |
| Probes              |                                        |                                         |                                        |                            |                                                |
| Assay               | Description                            | Probe Details                           | Source                                 | Extension Temperature (°C) | Assay Specifications                           |
| KRAS Multiplex      | Equal parts of G12C/ G12D/ G12R probes |                                         | In house                               | 60                         | Equal parts G12C, G12D, and G12R probes at 40X |
| KRAS G12C (c.34G>T) | Wildtype                               | 5'-VIC-TTGGAGCTGGTGGCGTA-NFQ-3'         | Applied Biosystems, Inc., USA          | 60                         | Assay at 40X - use 1x primer/probe mix         |
|                     | Mutant                                 | 5'-FAM-TTGGAGCTTGTGGCGTA-NFQ-3'         |                                        |                            |                                                |
| KRAS G12D (c.35G>A) | Wildtype                               | 5'-VIC-TTGGAGCTGGTGGCGTA-NFQ-3'         | Applied Biosystems, Inc., USA          | 60                         | Assay at 40X - use 1x primer/probe mix         |
|                     | Mutant                                 | 5'-FAM-TTGGAGCTGATGGCGTA-NFQ-3'         |                                        |                            |                                                |
| KRAS G12R (c.34G>C) | Wildtype                               | 5'-VIC-TTGGAGCTGGTGGCGTA-NFQ-3'         | Applied Biosystems, Inc., USA          | 60                         | Assay at 40X - use 1x primer/probe mix         |
|                     | Mutant                                 | 5'-FAM-TTGGAGCTCGTGGCGTA-NFQ-3'         |                                        |                            |                                                |
| KRAS G12V (c.35G>T) | Wildtype                               | 5'-Yak Yellow-CGCC+A+C+CA+GCT-IABkFQ-3' | Integrated DNA Technologies, Inc., USA | 60                         | 500nM primer + 200nM probe                     |
|                     | Mutant                                 | 5'-FAM-CG+CC+A+A+CAGC+TC-IABkFQ-3'      |                                        |                            |                                                |
| KRAS G12A (c.35G>C) | Wildtype                               | 5'-Yak Yellow-CGCC+A+C+CA+GCT-IABkFQ-3' | Integrated DNA Technologies, Inc., USA | 60                         | 500nM primer + 200nM probe                     |
|                     | Mutant                                 | 5'-FAM-CGCC+A+G+CA+GCT-IABkFQ-3'        |                                        |                            |                                                |
| KRAS G12S (c.34G>A) | Wildtype                               | 5'-Yak Yellow-CGCC+A+C+CA+GCT-IABkFQ-3' | Integrated DNA Technologies, Inc., USA | 60                         | 500nM primer + 200nM probe                     |
|                     | Mutant                                 | 5'-FAM-CGC+CA+C+T+AGC-IABkFQ-3'         |                                        |                            |                                                |

### Pre-amplification and droplet digital PCR – reaction procedure

The pre-amplification reactions were denatured at 95°C for 10 minutes, and cycled (94°C for 30 seconds, then 60°C for 4 minutes) for 10 cycles, followed by 4°C hold.

For ddPCR: after droplet generation the reactions were denatured at 95°C for 10 minutes and cycled (94°C for 30 seconds then 60°C for 90 seconds) at a 2.5C/sec ramp rate for 40 cycles; followed by 98°C for 10 minutes and final hold at 4°C.

### ***Threshold for ddPCR***

Once the samples had been read on the BioRad QX200 Droplet Reader, the number of droplets were reviewed to ensure there were, at minimum, 10,000 total droplets and 5,000 positive droplets (mutation (MUT) only + wildtype (WT) only). The sample was repeated if the threshold was not met. If the repeated run had above 1000 positive droplets and the results were consistent with the previous run, then we included the sample. Alternatively, if the sample was run twice on the same plate and the total added droplets were above the cut-off, then the average VAF of the two samples was used. If the sample continued to have low droplet counts, it was considered to have “failed” the assay and was excluded.

Interpretation of the ddPCR data and mutation calling involved the calculation of a VAF cut-off/threshold based on the results from the negative controls (endometriosis samples with no *KRAS* mutations), as previously described [12, 15].

For the multiplex assay, the average VAF for the negative controls multiplied by three was used as the threshold, except for the c.35G>T (p.G12V) probe, since mutant droplets appear in a region that is difficult to distinguish from the “no DNA” and “WT only” droplets. Thus, the threshold VAF was set lower (the average of the negative controls without multiplication by three) for c.35G>T (p.G12V) calls on the multiplex assay to avoid false negatives. As the multiplex assay assesses all six variants (see **Figure S2**), only mutant droplet clusters within the specific variant region of interest were considered for the VAF calculation of that variant. For example, if mutant droplets are identified in the c.35G>A (p.G12D) region and the c.34G>A (p.G12S) region for an individual sample, the VAF cut-off for the c.35G>A (p.G12D) variant will be calculated using mutant droplets only in the c.35G>A (p.G12D) region (i.e., the droplets within the c.34G>A (p.G12S) region are not included as mutant droplets in the calculation for VAF threshold of the c.35G>A (p.G12D) variant). Dual positive droplets were not included as mutant in the VAF calculation due to the non-specific clustering of these droplets (i.e., you cannot identify which variant is mutated).

In all cases the “positive” call was confirmed using variant specific probes in an individual (single-plex) assay. The average VAF for the negative controls multiplied by three was used as a threshold for all variants.

If the VAF from the sample was higher than the threshold VAF, the sample was called positive (i.e. mutation detected).

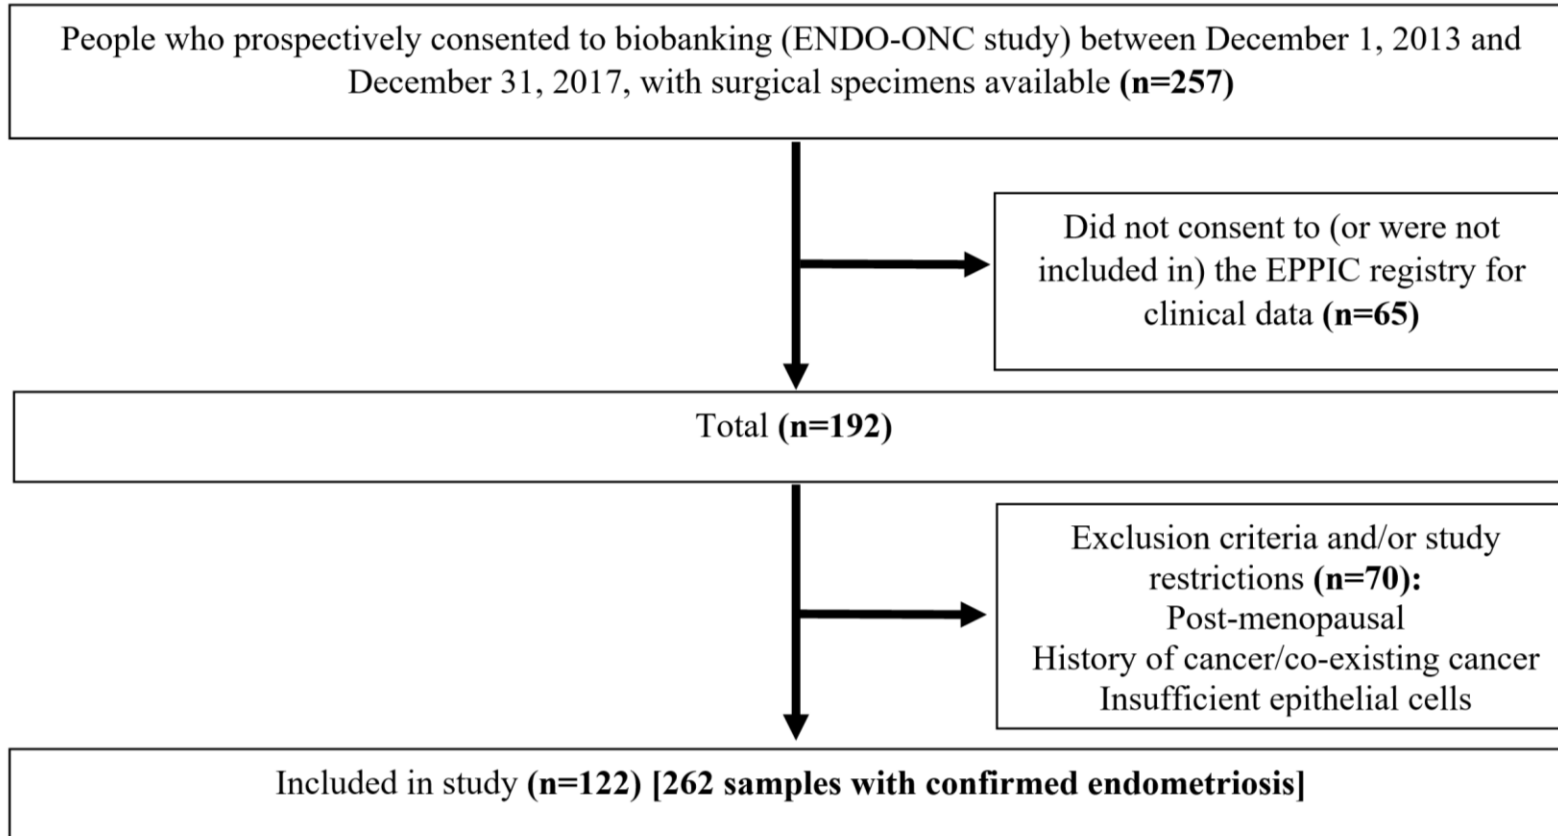

**Figure 1. Study flowchart.**

Flow chart of included and excluded cases. Subjects consented to both prospective biobanking and the prospective EPPIC registry for clinical data. Exclusions were both clinical (e.g. history of co-existing cancer, in order to exclude cases of malignant transformation) and technical (e.g. insufficient endometriosis epithelial cells in the tissue block, due to epithelium-restricted *KRAS* mutations). 122 subjects were included in the study, with 262 samples from the subjects based on our mutation testing strategy (see “[Specimen Enrichment and DNA Extraction](#)” under the “Materials and Methods” section).

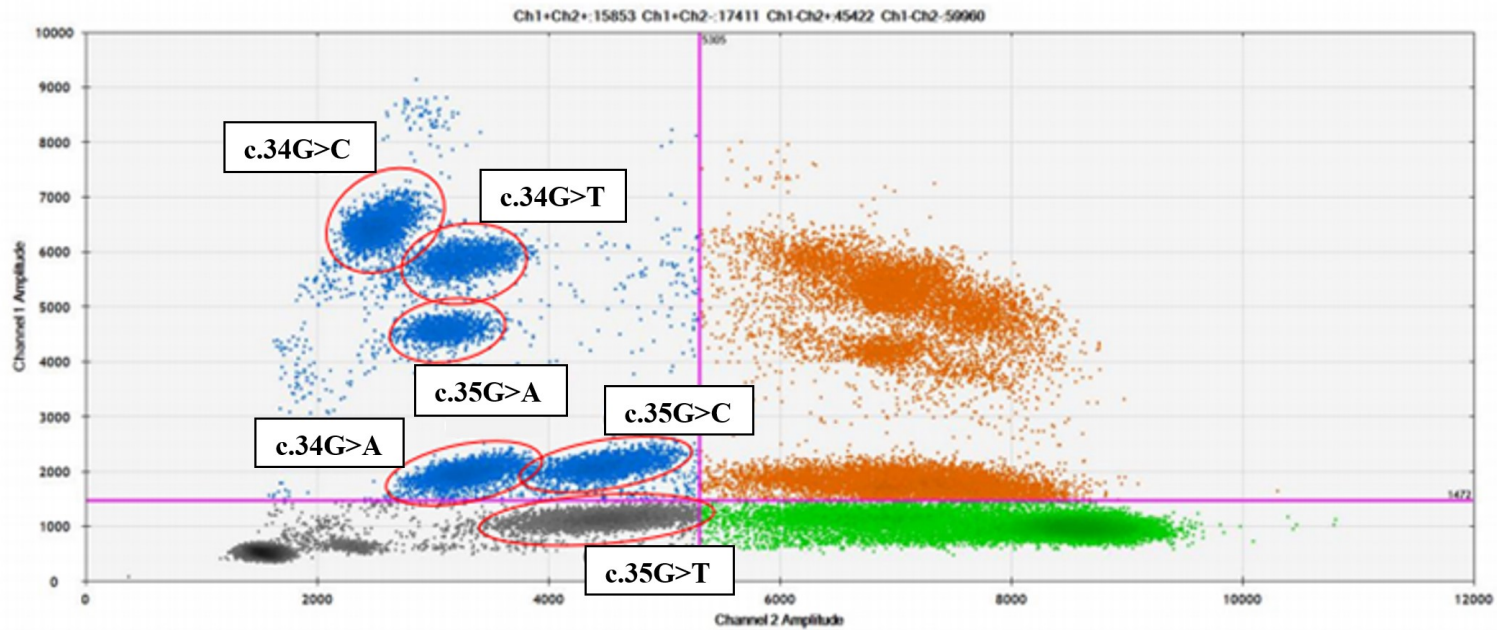

**Figure 2. Multiplex assay with all six *KRAS* codon 12 positive controls, each with a unique clustering region.**

The y-axis represents fluorescence of the FAM channel and the x-axis represents fluorescence of the VIC channel. The droplets containing mutant only DNA are shown in blue droplets on the top left quadrant; wildtype only DNA shown in the green droplets on the bottom right quadrant; dual positive droplets (both mutant and wildtype DNA present within the droplet) shown in the orange droplets at the top right quadrant; double negative droplets (no DNA) shown in the gray droplets in the bottom left quadrant. The pink line represents the threshold set to define each class of droplets. The regions of individual *KRAS* codon 12 variants are circled in red. c.34G>T: p.G12C; c.35G>A: p.G12D; c.34G>C: p.G12R; c.35G>T: p.G12V; c.35G>C: p.G12A; c.34G>A: p.G12S.

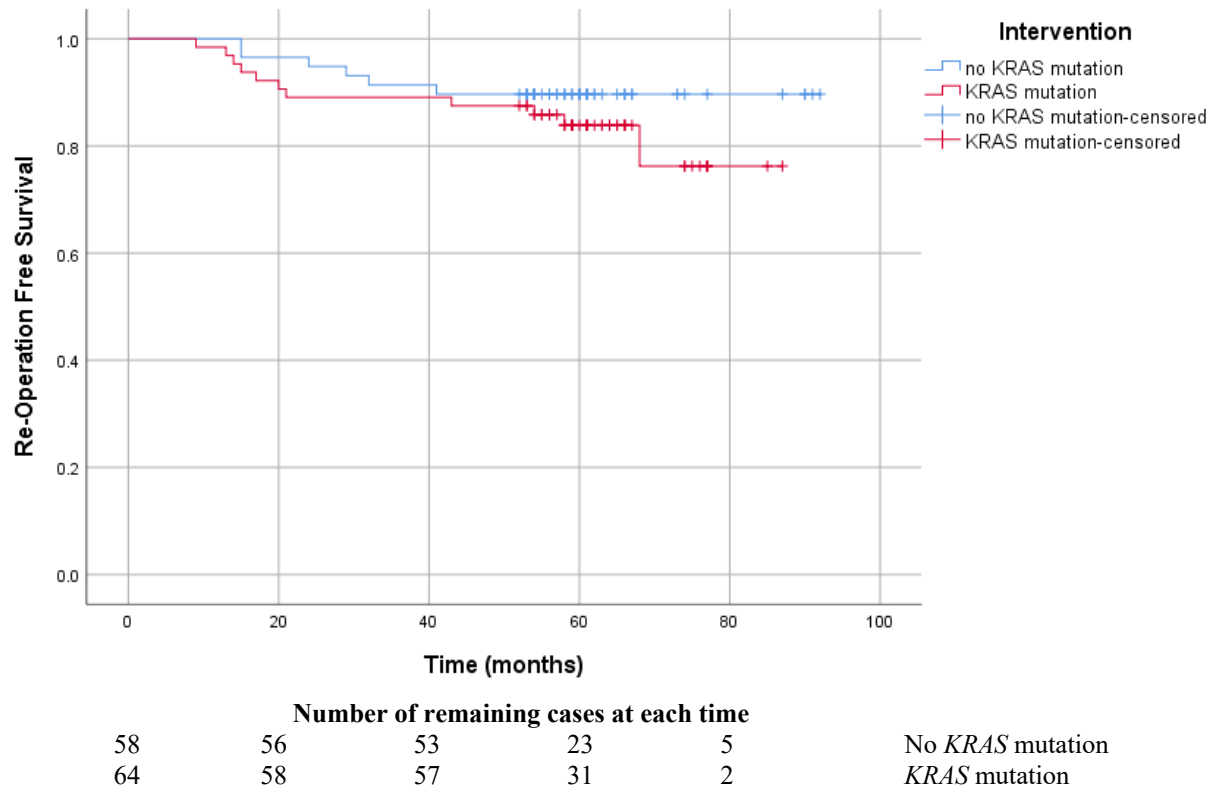

**Figure 3. Kaplan Meier Survival Analysis.**

Kaplan Meier curves for re-operation free survival based on *KRAS* mutation status. Re-operation occurred in 17.2% (11/64) of cases with *KRAS* mutation compared to 10.3% (6/58) of cases without *KRAS* mutation (RR = 1.66, 95% CI: 0.66-4.21). Cases were censored at end of the follow-up period (May 2022). Log-rank test for *KRAS* mutation,  $p = 0.30$ .

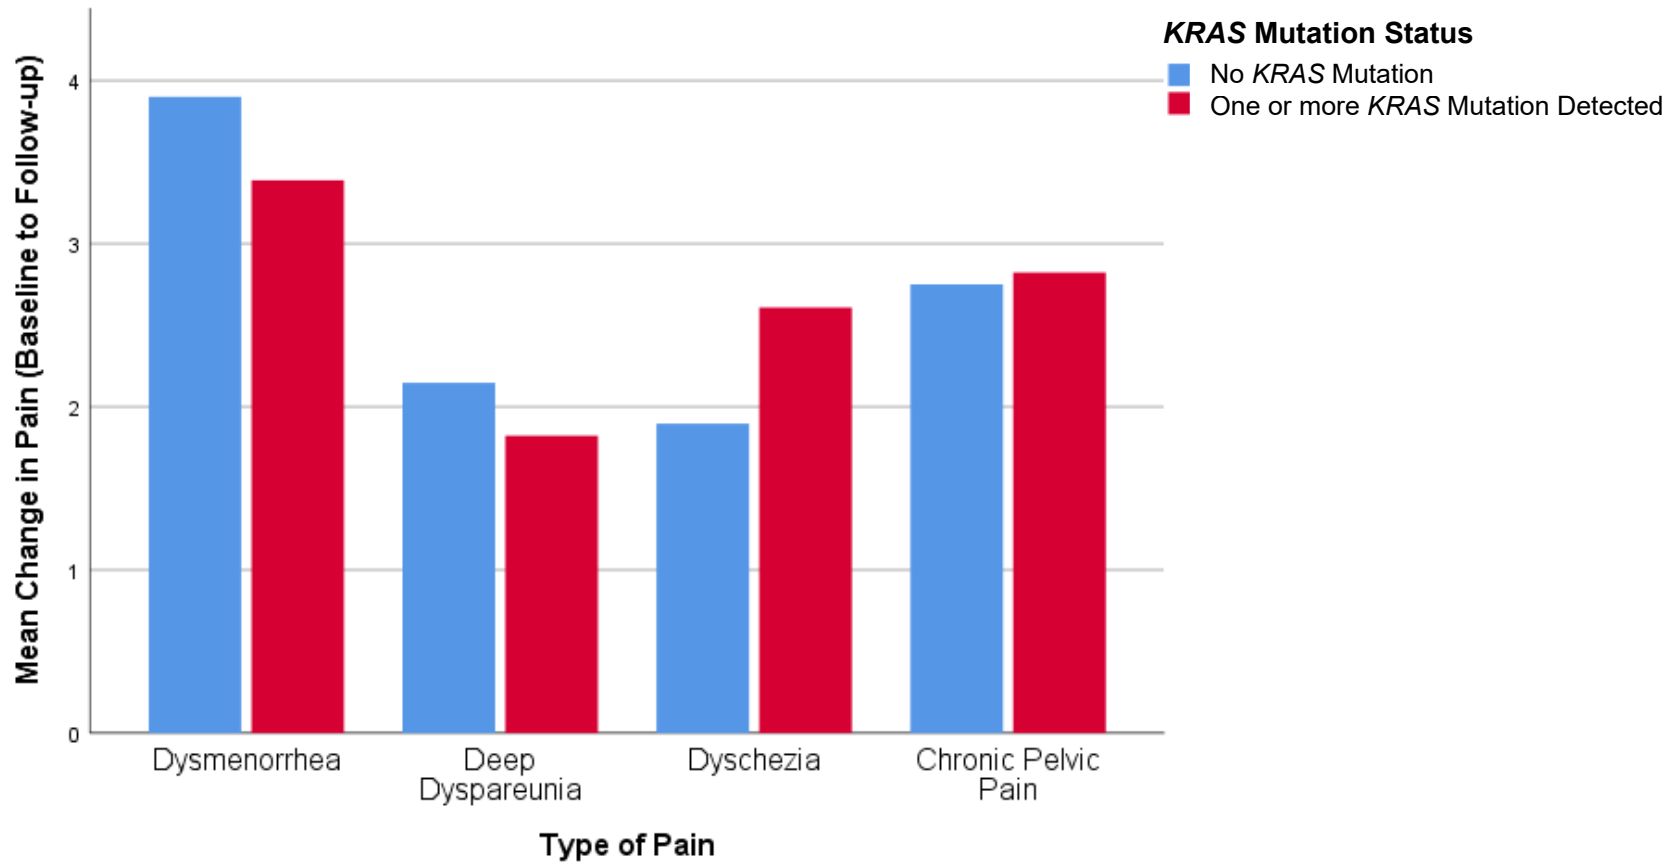

**Figure 4. Change in pain scores between baseline and follow-up, based on mutation status.**

The mean change in pain (baseline pain score minus follow-up pain score) is shown for four pain scores: dysmenorrhea, deep dyspareunia, dyschezia, and chronic pelvic pain. Pain scores were measured on a numeric rating scale from 0-10 (10=worst pain imaginable), as previously described [24]. Blue bars represent the mean change in pain for people with no *KRAS* mutations detected. Red bars represent the mean change in pain for people with *KRAS* mutation(s) detected. As shown, similar improvements in pain were seen after surgery in both groups.

**Table S1. Comparison between manual macrodissection and laser capture microdissection.**

| <b>Enrichment</b>             | <b>No <i>KRAS</i> Mutation</b> | <b><i>KRAS</i> Mutation</b> | <b>Chi Square</b> | <b>P Value</b> |
|-------------------------------|--------------------------------|-----------------------------|-------------------|----------------|
| Laser capture microdissection | 22 (73.3%)                     | 8 (26.7%)                   | 0.81              | 0.42           |
| Manual macrodissection        | 151 (65.1%)                    | 81 (34.9%)                  |                   |                |

Bivariate analysis identified no significance difference in detection of *KRAS* mutation between the samples enriched by manual needle macrodissection vs. laser capture microdissection. As well, seven cases of superficial peritoneal endometriosis, without *KRAS* mutation after manual macrodissection, were re-tested after laser capture microdissection which confirmed the absence of *KRAS* mutation.



**Table S2. Cell line controls.**

| <i>KRAS</i> Assay | Cell Line                                     |
|-------------------|-----------------------------------------------|
| c.34G>T (p.G12C)  | MIA PaCa-2 Cell Line                          |
| c.35G>A (p.G12D)  | HEY Cell Line                                 |
| c.34G>C (p.G12R)  | PK-8 Cell Line                                |
| c.35G>T (p.G12V)  | 1:1 Mix of OvCar5 Cell Line with Wildtype DNA |
| c.35G>C (p.G12A)  | H2009 Cell Line                               |
| c.34G>A (p.G12S)  | 1:1 Mix of A549 Cell Line and Wildtype DNA    |

Positive variants on multiplex ddPCR were confirmed with variant-specific ddPCR assays that were also used to establish variant allele frequency and sensitivity relative to cell line controls.

**Table S3. Mean detection thresholds for the individual *KRAS* assays.**

| <i>KRAS</i> Variant | Mean Detection Threshold | Range          |
|---------------------|--------------------------|----------------|
| c.34G>T (p.G12C)    | 0.10%                    | 0.0040%-0.55%  |
| c.35G>A (p.G12D)    | 0.76%                    | 0.35%-1.5%     |
| c.34G>C (p.G12R)    | 0.0070%                  | 0.0020%-0.020% |
| c.35G>T (p.G12V)    | 0.013%                   | 0%-0.27%       |
| c.35G>C (p.G12A)    | 0.0028%                  | 0%-0.0060%     |
| c.34G>A (p.G12S)    | 0.81%                    | 0.44%-1.2%     |

The mean detection thresholds (per assay/per run) and ranges for the individual, variant-specific *KRAS* mutation ddPCR assays used to confirm any suspected positive variants detected after multiplex ddPCR assay.

**Table S4. Demographics.**

The study sample is from a research data registry, with consented subjects recruited from a tertiary referral center for endometriosis and pelvic pain in the province of British Columbia, Canada. The Table below shows the diversity in various socioeconomic variables within the study sample.

It should be emphasized that the center has a minimum age cut-off of 18 years, and therefore adolescent patients with endometriosis will not be represented in this sample. There may also be issues with generalizability to community/primary care settings or to other provinces or countries. Moreover, the sample has proportionally fewer non-Caucasian ethnicities in comparison to census data from British Columbia.

Demographics of the study group:

| Variable <sup>1</sup>               | Mean ± SD or # (%) |
|-------------------------------------|--------------------|
| <i>Patient characteristics</i>      |                    |
| Age                                 | 34.4±6.6           |
| Parity                              |                    |
| Parous                              | 34 (27.9%)         |
| Nulliparous                         | 87 (71.3%)         |
| Missing                             | 1 (0.8%)           |
| Ethnicity                           |                    |
| Caucasian only ethnicity            | 89 (73.0%)         |
| Other ethnicity                     | 28 (23.0%)         |
| Mixed ethnicity                     | 4 (3.3%)           |
| Missing                             | 1 (0.8%)           |
| Sexual Orientation <sup>2</sup>     |                    |
| Heterosexual                        | 112 (91.8%)        |
| Lesbian                             | 2 (1.6%)           |
| Bisexual                            | 6 (4.9%)           |
| Other                               | 1 (0.8%)           |
| Missing                             | 1 (0.8%)           |
| Employment status                   |                    |
| Working                             | 93 (76.9%)         |
| Not working                         | 28 (23.1%)         |
| Relationship status                 |                    |
| Single                              | 26 (21.5%)         |
| Dating                              | 14 (11.6%)         |
| Married                             | 62 (51.2%)         |
| Common-law                          | 16 (13.2%)         |
| Separated                           | 1 (0.8%)           |
| Divorced                            | 2 (1.7%)           |
| Education                           |                    |
| Graduated high school or earned GED | 14 (11.6%)         |
| Some college                        | 33 (27.3%)         |
| Graduated 2 years college           | 21 (17.4%)         |
| Graduated 4 years college           | 21 (17.4%)         |
| Post-grad degree                    | 27 (22.3%)         |
| Other                               | 5 (4.1%)           |
| Income (annual)                     |                    |

|        |            |
|--------|------------|
| <20K   | 13 (10.7%) |
| 20-39K | 20 (16.5%) |
| 40-59K | 20 (16.5%) |
| 60-79K | 16 (13.2%) |
| 80-99K | 19 (15.7%) |
| >100K  | 33 (27.3%) |

<sup>1</sup>N = 121

<sup>2</sup>Sexual orientation was assessed but due to the small sample sizes in the non-heterosexual groups we could not analyze the data by sexual orientation. Gender identity was not assessed in our registry until 2018.

**Table S5. Summary of mutation calls.**

| Case ID | Sample ID | Endo type | Anatomical Location   | Enrich. method | Variant tested | Multi. cut-off VAF (%) | Multi. VAF (%) | Indiv. cut-off VAF (%) | Indiv. VAF (%) | Result   | KRAS Variant |
|---------|-----------|-----------|-----------------------|----------------|----------------|------------------------|----------------|------------------------|----------------|----------|--------------|
| C_1     | OMA27     | OMA       | Ovary (B)             | Macro          | G12C           | 0*                     | 0*             |                        |                | Wildtype |              |
| C_1     | OMA27     | OMA       | Ovary (B)             | Macro          | G12D           | 0-043                  | 0-0087         |                        |                | Wildtype |              |
| C_1     | OMA27     | OMA       | Ovary (B)             | Macro          | G12R           | 0*                     | 0*             |                        |                | Wildtype |              |
| C_1     | OMA27     | OMA       | Ovary (B)             | Macro          | G12V           | 0-0020                 | 0-0017         |                        |                | Wildtype |              |
| C_1     | OMA27     | OMA       | Ovary (B)             | Macro          | G12A           | 0*                     | 0*             |                        |                | Wildtype |              |
| C_1     | OMA27     | OMA       | Ovary (B)             | Macro          | G12S           | 0-031                  | 0-0090         |                        |                | Wildtype |              |
| C_1     | SUP72     | SUP       | Cul-de-sac            | Macro          | G12C           | 0*                     | 0*             |                        |                | Wildtype |              |
| C_1     | SUP72     | SUP       | Cul-de-sac            | Macro          | G12D           | 0-019                  | 0-0017         |                        |                | Wildtype |              |
| C_1     | SUP72     | SUP       | Cul-de-sac            | Macro          | G12R           | 0*                     | 0*             |                        |                | Wildtype |              |
| C_1     | SUP72     | SUP       | Cul-de-sac            | Macro          | G12V           | 0-0016                 | 0*             |                        |                | Wildtype |              |
| C_1     | SUP72     | SUP       | Cul-de-sac            | Macro          | G12A           | 0-0016                 | 0*             |                        |                | Wildtype |              |
| C_1     | SUP72     | SUP       | Cul-de-sac            | Macro          | G12S           | 0-030                  | 0*             |                        |                | Wildtype |              |
| C_2     | SUP46     | SUP       | Rectosigmoid junction | Macro          | G12C           | 0*                     | 0*             |                        |                | Wildtype |              |
| C_2     | SUP46     | SUP       | Rectosigmoid junction | Macro          | G12D           | 0-027                  | 0*             |                        |                | Wildtype |              |
| C_2     | SUP46     | SUP       | Rectosigmoid junction | Macro          | G12R           | 0*                     | 0*             |                        |                | Wildtype |              |
| C_2     | SUP46     | SUP       | Rectosigmoid junction | Macro          | G12V           | 0*                     | 0*             |                        |                | Wildtype |              |
| C_2     | SUP46     | SUP       | Rectosigmoid junction | Macro          | G12A           | 0-0021                 | 0*             |                        |                | Wildtype |              |
| C_2     | SUP46     | SUP       | Rectosigmoid junction | Macro          | G12S           | 0-021                  | 0*             |                        |                | Wildtype |              |
| C_2     | SUP80     | SUP       | Uterosacral (L)       | Macro          | G12C           | 0-0058                 | 0*             |                        |                | Wildtype |              |
| C_2     | SUP80     | SUP       | Uterosacral (L)       | Macro          | G12D           | 0-084                  | 0-0028         |                        |                | Wildtype |              |
| C_2     | SUP80     | SUP       | Uterosacral (L)       | Macro          | G12R           | 0*                     | 0*             |                        |                | Wildtype |              |
| C_2     | SUP80     | SUP       | Uterosacral (L)       | Macro          | G12V           | 0-0036                 | 0*             |                        |                | Wildtype |              |
| C_2     | SUP80     | SUP       | Uterosacral (L)       | Macro          | G12A           | 0-0022                 | 0*             |                        |                | Wildtype |              |
| C_2     | SUP80     | SUP       | Uterosacral (L)       | Macro          | G12S           | 0-046                  | 0-0043         |                        |                | Wildtype |              |

| Case ID | Sample ID | Endo type | Anatomical Location | Enrich. method | Variant tested | Multi. cut-off VAF (%) | Multi. VAF (%) | Indiv. cut-off VAF (%) | Indiv. VAF (%) | Result   | KRAS Variant |
|---------|-----------|-----------|---------------------|----------------|----------------|------------------------|----------------|------------------------|----------------|----------|--------------|
| C_3     | OMA28     | OMA       | Ovary (R)           | Macro          | G12C           | 0*                     | 0*             |                        |                | Wildtype |              |
| C_3     | OMA28     | OMA       | Ovary (R)           | Macro          | G12D           | 0-019                  | 0-0087         |                        |                | Wildtype |              |
| C_3     | OMA28     | OMA       | Ovary (R)           | Macro          | G12R           | 0*                     | 0*             |                        |                | Wildtype |              |
| C_3     | OMA28     | OMA       | Ovary (R)           | Macro          | G12V           | 0-0016                 | 0-0022         | 0-017                  | 0-0017         | Wildtype |              |
| C_3     | OMA28     | OMA       | Ovary (R)           | Macro          | G12A           | 0-0016                 | 0*             |                        |                | Wildtype |              |
| C_3     | OMA28     | OMA       | Ovary (R)           | Macro          | G12S           | 0-030                  | 0*             |                        |                | Wildtype |              |
| C_4     | SUP73     | SUP       | Pelvic sidewall (L) | Macro          | G12C           | 0*                     | 0*             |                        |                | Wildtype |              |
| C_4     | SUP73     | SUP       | Pelvic sidewall (L) | Macro          | G12D           | 0-019                  | 0*             |                        |                | Wildtype |              |
| C_4     | SUP73     | SUP       | Pelvic sidewall (L) | Macro          | G12R           | 0*                     | 0*             |                        |                | Wildtype |              |
| C_4     | SUP73     | SUP       | Pelvic sidewall (L) | Macro          | G12V           | 0-0016                 | 0*             |                        |                | Wildtype |              |
| C_4     | SUP73     | SUP       | Pelvic sidewall (L) | Macro          | G12A           | 0-0016                 | 0*             |                        |                | Wildtype |              |
| C_4     | SUP73     | SUP       | Pelvic sidewall (L) | Macro          | G12S           | 0-030                  | 0*             |                        |                | Wildtype |              |
| C_4     | SUP81     | SUP       | Cul-de-sac          | Macro          | G12C           | 0-0058                 | 0*             |                        |                | Wildtype |              |
| C_4     | SUP81     | SUP       | Cul-de-sac          | Macro          | G12D           | 0-084                  | 0*             |                        |                | Wildtype |              |
| C_4     | SUP81     | SUP       | Cul-de-sac          | Macro          | G12R           | 0*                     | 0*             |                        |                | Wildtype |              |
| C_4     | SUP81     | SUP       | Cul-de-sac          | Macro          | G12V           | 0-0036                 | 0-0028         |                        |                | Wildtype |              |
| C_4     | SUP81     | SUP       | Cul-de-sac          | Macro          | G12A           | 0-0022                 | 0*             |                        |                | Wildtype |              |
| C_4     | SUP81     | SUP       | Cul-de-sac          | Macro          | G12S           | 0-046                  | 0-0014         |                        |                | Wildtype |              |
| C_5     | SUP55     | SUP       | Appendix            | Macro          | G12C           | 0*                     | 0*             |                        |                | Wildtype |              |
| C_5     | SUP55     | SUP       | Appendix            | Macro          | G12D           | 0-027                  | 0-011          |                        |                | Wildtype |              |
| C_5     | SUP55     | SUP       | Appendix            | Macro          | G12R           | 0*                     | 0*             |                        |                | Wildtype |              |
| C_5     | SUP55     | SUP       | Appendix            | Macro          | G12V           | 0*                     | 0-0022         | 0-0065                 | 0-0055         | Wildtype |              |
| C_5     | SUP55     | SUP       | Appendix            | Macro          | G12A           | 0-0021                 | 0*             |                        |                | Wildtype |              |
| C_5     | SUP55     | SUP       | Appendix            | Macro          | G12S           | 0-021                  | 0-0070         |                        |                | Wildtype |              |
| C_6     | OMA6      | OMA       | Ovary (L)           | Macro          | G12C           | 0-0019                 | 0*             |                        |                | Wildtype |              |
| C_6     | OMA6      | OMA       | Ovary (L)           | Macro          | G12D           | 0-022                  | 0-031          | 0-64                   | 0-26           | Wildtype |              |
| C_6     | OMA6      | OMA       | Ovary (L)           | Macro          | G12R           | 0*                     | 0-0031         | 0-0024                 | 0-058          | Mutant   | G12R         |
| C_6     | OMA6      | OMA       | Ovary (L)           | Macro          | G12V           | 0-018                  | 0-0031         |                        |                | Wildtype |              |

| Case ID | Sample ID | Endo type | Anatomical Location | Enrich. method | Variant tested | Multi. cut-off VAF (%) | Multi. VAF (%) | Indiv. cut-off VAF (%) | Indiv. VAF (%) | Result   | KRAS Variant |
|---------|-----------|-----------|---------------------|----------------|----------------|------------------------|----------------|------------------------|----------------|----------|--------------|
| C_6     | OMA6      | OMA       | Ovary (L)           | Macro          | G12A           | 0-0016                 | 0-0031         | 0-0061                 | 0-0026         | Wildtype |              |
| C_6     | OMA6      | OMA       | Ovary (L)           | Macro          | G12S           | 0-025                  | 0-022          |                        |                | Wildtype |              |
| C_6     | SUP1      | SUP       | Uterosacral (L)     | Macro          | G12C           | 0-0019                 | 0*             |                        |                | Wildtype |              |
| C_6     | SUP1      | SUP       | Uterosacral (L)     | Macro          | G12D           | 0-022                  | 0-0021         |                        |                | Wildtype |              |
| C_6     | SUP1      | SUP       | Uterosacral (L)     | Macro          | G12R           | 0*                     | 0*             |                        |                | Wildtype |              |
| C_6     | SUP1      | SUP       | Uterosacral (L)     | Macro          | G12V           | 0-018                  | 0-0021         |                        |                | Wildtype |              |
| C_6     | SUP1      | SUP       | Uterosacral (L)     | Macro          | G12A           | 0-0016                 | 0*             |                        |                | Wildtype |              |
| C_6     | SUP1      | SUP       | Uterosacral (L)     | Macro          | G12S           | 0-025                  | 0-0042         |                        |                | Wildtype |              |
| C_6     | SUP82     | SUP       | Cul-de-sac          | Macro          | G12C           | 0*                     | 0*             |                        |                | Wildtype |              |
| C_6     | SUP82     | SUP       | Cul-de-sac          | Macro          | G12D           | 0-043                  | 0-0091         |                        |                | Wildtype |              |
| C_6     | SUP82     | SUP       | Cul-de-sac          | Macro          | G12R           | 0*                     | 0*             |                        |                | Wildtype |              |
| C_6     | SUP82     | SUP       | Cul-de-sac          | Macro          | G12V           | 0-0020                 | 0*             |                        |                | Wildtype |              |
| C_6     | SUP82     | SUP       | Cul-de-sac          | Macro          | G12A           | 0*                     | 0*             |                        |                | Wildtype |              |
| C_6     | SUP82     | SUP       | Cul-de-sac          | Macro          | G12S           | 0-031                  | 0-011          |                        |                | Wildtype |              |
| C_7     | SUP56     | SUP       | Cul-de-sac (A)      | Macro          | G12C           | 0*                     | 0*             |                        |                | Wildtype |              |
| C_7     | SUP56     | SUP       | Cul-de-sac (A)      | Macro          | G12D           | 0-027                  | 0-026          |                        |                | Wildtype |              |
| C_7     | SUP56     | SUP       | Cul-de-sac (A)      | Macro          | G12R           | 0*                     | 0*             |                        |                | Wildtype |              |
| C_7     | SUP56     | SUP       | Cul-de-sac (A)      | Macro          | G12V           | 0*                     | 0-0024         | 0-0065                 | 0-033          | Mutant   | G12V         |
| C_7     | SUP56     | SUP       | Cul-de-sac (A)      | Macro          | G12A           | 0-0021                 | 0*             |                        |                | Wildtype |              |
| C_7     | SUP56     | SUP       | Cul-de-sac (A)      | Macro          | G12S           | 0-021                  | 0-014          |                        |                | Wildtype |              |
| C_7     | SUP83     | SUP       | Uterosacral (L)     | Macro          | G12C           | 0*                     | 0*             |                        |                | Wildtype |              |
| C_7     | SUP83     | SUP       | Uterosacral (L)     | Macro          | G12D           | 0-043                  | 0*             |                        |                | Wildtype |              |
| C_7     | SUP83     | SUP       | Uterosacral (L)     | Macro          | G12R           | 0*                     | 0*             |                        |                | Wildtype |              |
| C_7     | SUP83     | SUP       | Uterosacral (L)     | Macro          | G12V           | 0-0020                 | 0*             |                        |                | Wildtype |              |
| C_7     | SUP83     | SUP       | Uterosacral (L)     | Macro          | G12A           | 0*                     | 0*             |                        |                | Wildtype |              |
| C_7     | SUP83     | SUP       | Uterosacral (L)     | Macro          | G12S           | 0-031                  | 0*             |                        |                | Wildtype |              |
| C_8     | SUP57     | SUP       | Uterosacral (L)     | Macro          | G12C           | 0*                     | 0*             |                        |                | Wildtype |              |
| C_8     | SUP57     | SUP       | Uterosacral (L)     | Macro          | G12D           | 0-027                  | 0-0021         |                        |                | Wildtype |              |

| Case ID | Sample ID | Endo type | Anatomical Location | Enrich. method | Variant tested | Multi. cut-off VAF (%) | Multi. VAF (%) | Indiv. cut-off VAF (%) | Indiv. VAF (%) | Result   | KRAS Variant |
|---------|-----------|-----------|---------------------|----------------|----------------|------------------------|----------------|------------------------|----------------|----------|--------------|
| C_8     | SUP57     | SUP       | Uterosacral (L)     | Macro          | G12R           | 0*                     | 0*             |                        |                | Wildtype |              |
| C_8     | SUP57     | SUP       | Uterosacral (L)     | Macro          | G12V           | 0*                     | 0*             |                        |                | Wildtype |              |
| C_8     | SUP57     | SUP       | Uterosacral (L)     | Macro          | G12A           | 0-0021                 | 0-0021         | 0*                     | 0*             | Wildtype |              |
| C_8     | SUP57     | SUP       | Uterosacral (L)     | Macro          | G12S           | 0-021                  | 0-0023         |                        |                | Wildtype |              |
| C_9     | SUP74     | SUP       | Cul-de-sac (L)      | Macro          | G12C           | 0-0058                 | 0*             |                        |                | Wildtype |              |
| C_9     | SUP74     | SUP       | Cul-de-sac (L)      | Macro          | G12D           | 0-084                  | 0-018          |                        |                | Wildtype |              |
| C_9     | SUP74     | SUP       | Cul-de-sac (L)      | Macro          | G12R           | 0*                     | 0*             |                        |                | Wildtype |              |
| C_9     | SUP74     | SUP       | Cul-de-sac (L)      | Macro          | G12V           | 0-0036                 | 0-0061         | 0-0053                 | 0-030          | Mutant   | G12V         |
| C_9     | SUP74     | SUP       | Cul-de-sac (L)      | Macro          | G12A           | 0-0022                 | 0*             |                        |                | Wildtype |              |
| C_9     | SUP74     | SUP       | Cul-de-sac (L)      | Macro          | G12S           | 0-046                  | 0-0061         |                        |                | Wildtype |              |
| C_9     | SUP84     | SUP       | Pelvic sidewall (L) | Macro          | G12C           | 0*                     | 0*             |                        |                | Wildtype |              |
| C_9     | SUP84     | SUP       | Pelvic sidewall (L) | Macro          | G12D           | 0-043                  | 0-0029         |                        |                | Wildtype |              |
| C_9     | SUP84     | SUP       | Pelvic sidewall (L) | Macro          | G12R           | 0*                     | 0*             |                        |                | Wildtype |              |
| C_9     | SUP84     | SUP       | Pelvic sidewall (L) | Macro          | G12V           | 0-0020                 | 0*             |                        |                | Wildtype |              |
| C_9     | SUP84     | SUP       | Pelvic sidewall (L) | Macro          | G12A           | 0*                     | 0*             |                        |                | Wildtype |              |
| C_9     | SUP84     | SUP       | Pelvic sidewall (L) | Macro          | G12S           | 0-031                  | 0*             |                        |                | Wildtype |              |
| C_10    | DIE105    | DIE       | Ureter (L)          | LCM            | G12C           | 0-010                  | 0-0088         |                        |                | Wildtype |              |
| C_10    | DIE105    | DIE       | Ureter (L)          | LCM            | G12D           | 0-043                  | 0-040          |                        |                | Wildtype |              |
| C_10    | DIE105    | DIE       | Ureter (L)          | LCM            | G12R           | 0-0016                 | 0*             |                        |                | Wildtype |              |
| C_10    | DIE105    | DIE       | Ureter (L)          | LCM            | G12V           | 0-010                  | 0-018          | 0-010                  | 0*             | Wildtype |              |
| C_10    | DIE105    | DIE       | Ureter (L)          | LCM            | G12A           | 0-0046                 | 0*             |                        |                | Wildtype |              |
| C_10    | DIE105    | DIE       | Ureter (L)          | LCM            | G12S           | 0-085                  | 0-075          | 1-2                    | 0-38           | Wildtype |              |
| C_10    | SUP58     | SUP       | Ovary (NS)          | Macro          | G12C           | 0*                     | 0*             |                        |                | Wildtype |              |
| C_10    | SUP58     | SUP       | Ovary (NS)          | Macro          | G12D           | 0-027                  | 0-024          |                        |                | Wildtype |              |
| C_10    | SUP58     | SUP       | Ovary (NS)          | Macro          | G12R           | 0*                     | 0*             |                        |                | Wildtype |              |
| C_10    | SUP58     | SUP       | Ovary (NS)          | Macro          | G12V           | 0*                     | 0-0027         | 0-0065                 | 0-0024         | Wildtype |              |
| C_10    | SUP58     | SUP       | Ovary (NS)          | Macro          | G12A           | 0-0021                 | 0*             |                        |                | Wildtype |              |
| C_10    | SUP58     | SUP       | Ovary (NS)          | Macro          | G12S           | 0-021                  | 0-024          | 1-2                    | 0-29           | Wildtype |              |



| Case ID | Sample ID | Endo type | Anatomical Location | Enrich. method | Variant tested | Multi. cut-off VAF (%) | Multi. VAF (%) | Indiv. cut-off VAF (%) | Indiv. VAF (%) | Result   | KRAS Variant |
|---------|-----------|-----------|---------------------|----------------|----------------|------------------------|----------------|------------------------|----------------|----------|--------------|
| C_10    | SUP85     | SUP       | Cul-de-sac          | Macro          | G12C           | 0*                     | 0*             |                        |                | Wildtype |              |
| C_10    | SUP85     | SUP       | Cul-de-sac          | Macro          | G12D           | 0-043                  | 0-069          | 1-5                    | 0-39           | Wildtype |              |
| C_10    | SUP85     | SUP       | Cul-de-sac          | Macro          | G12R           | 0*                     | 0*             |                        |                | Wildtype |              |
| C_10    | SUP85     | SUP       | Cul-de-sac          | Macro          | G12V           | 0-0020                 | 0*             |                        |                | Wildtype |              |
| C_10    | SUP85     | SUP       | Cul-de-sac          | Macro          | G12A           | 0*                     | 0-0031         | 0-0022                 | 0*             | Wildtype |              |
| C_10    | SUP85     | SUP       | Cul-de-sac          | Macro          | G12S           | 0-031                  | 0-0095         |                        |                | Wildtype |              |
| C_11    | OMA7      | OMA       | Ovary (L)           | Macro          | G12C           | 0-0019                 | 0*             | 0-039                  | 0-0057         | Wildtype |              |
| C_11    | OMA7      | OMA       | Ovary (L)           | Macro          | G12D           | 0-022                  | 0-011          |                        |                | Wildtype |              |
| C_11    | OMA7      | OMA       | Ovary (L)           | Macro          | G12R           | 0*                     | 0-0022         | 0-0024                 | 0-0026         | Mutant   | G12R         |
| C_11    | OMA7      | OMA       | Ovary (L)           | Macro          | G12V           | 0-018                  | 0*             | 0-0016                 | 0*             | Wildtype |              |
| C_11    | OMA7      | OMA       | Ovary (L)           | Macro          | G12A           | 0-0016                 | 0*             |                        |                | Wildtype |              |
| C_11    | OMA7      | OMA       | Ovary (L)           | Macro          | G12S           | 0-025                  | 0-0022         |                        |                | Wildtype |              |
| C_11    | SUP2      | SUP       | Cul-de-sac (L)      | Macro          | G12C           | 0-0019                 | 0*             |                        |                | Wildtype |              |
| C_11    | SUP2      | SUP       | Cul-de-sac (L)      | Macro          | G12D           | 0-022                  | 0-012          |                        |                | Wildtype |              |
| C_11    | SUP2      | SUP       | Cul-de-sac (L)      | Macro          | G12R           | 0*                     | 0*             |                        |                | Wildtype |              |
| C_11    | SUP2      | SUP       | Cul-de-sac (L)      | Macro          | G12V           | 0-018                  | 0-12           | 0-0016                 | 0*             | Wildtype |              |
| C_11    | SUP2      | SUP       | Cul-de-sac (L)      | Macro          | G12A           | 0-0016                 | 0-12           | 0-0061                 | 0*             | Wildtype |              |
| C_11    | SUP2      | SUP       | Cul-de-sac (L)      | Macro          | G12S           | 0-025                  | 0*             |                        |                | Wildtype |              |
| C_11    | SUP86     | SUP       | Pelvic sidewall (R) | Macro          | G12C           | 0*                     | 0*             |                        |                | Wildtype |              |
| C_11    | SUP86     | SUP       | Pelvic sidewall (R) | Macro          | G12D           | 0-043                  | 0*             |                        |                | Wildtype |              |
| C_11    | SUP86     | SUP       | Pelvic sidewall (R) | Macro          | G12R           | 0*                     | 0*             |                        |                | Wildtype |              |
| C_11    | SUP86     | SUP       | Pelvic sidewall (R) | Macro          | G12V           | 0-0020                 | 0*             |                        |                | Wildtype |              |
| C_11    | SUP86     | SUP       | Pelvic sidewall (R) | Macro          | G12A           | 0*                     | 0*             |                        |                | Wildtype |              |
| C_11    | SUP86     | SUP       | Pelvic sidewall (R) | Macro          | G12S           | 0-031                  | 0*             |                        |                | Wildtype |              |
| C_12    | SUP3      | SUP       | Uterosacral (R)     | Macro          | G12C           | 0-0019                 | 0*             |                        |                | Wildtype |              |
| C_12    | SUP3      | SUP       | Uterosacral (R)     | Macro          | G12D           | 0-022                  | 0-43           | 0-64                   | 5-3            | Mutant   | G12D         |
| C_12    | SUP3      | SUP       | Uterosacral (R)     | Macro          | G12R           | 0*                     | 0*             |                        |                | Wildtype |              |
| C_12    | SUP3      | SUP       | Uterosacral (R)     | Macro          | G12V           | 0-018                  | 0-0045         |                        |                | Wildtype |              |

| Case ID | Sample ID | Endo type | Anatomical Location | Enrich. method | Variant tested | Multi. cut-off VAF (%) | Multi. VAF (%) | Indiv. cut-off VAF (%) | Indiv. VAF (%) | Result   | KRAS Variant |
|---------|-----------|-----------|---------------------|----------------|----------------|------------------------|----------------|------------------------|----------------|----------|--------------|
| C_12    | SUP3      | SUP       | Uterosacral (R)     | Macro          | G12A           | 0-0016                 | 0*             |                        |                | Wildtype |              |
| C_12    | SUP3      | SUP       | Uterosacral (R)     | Macro          | G12S           | 0-025                  | 0-018          |                        |                | Wildtype |              |
| C_12    | SUP87     | SUP       | Ovary (B)           | Macro          | G12C           | 0-0058                 | 0-063          | 0-072                  | 1-2            | Mutant   | G12C         |
| C_12    | SUP87     | SUP       | Ovary (B)           | Macro          | G12D           | 0-084                  | 0-011          |                        |                | Wildtype |              |
| C_12    | SUP87     | SUP       | Ovary (B)           | Macro          | G12R           | 0*                     | 0-0021         | 0-0020                 | 0-0015         | Wildtype |              |
| C_12    | SUP87     | SUP       | Ovary (B)           | Macro          | G12V           | 0-0036                 | 0-0021         |                        |                | Wildtype |              |
| C_12    | SUP87     | SUP       | Ovary (B)           | Macro          | G12A           | 0-0022                 | 0*             |                        |                | Wildtype |              |
| C_12    | SUP87     | SUP       | Ovary (B)           | Macro          | G12S           | 0-046                  | 0-013          |                        |                | Wildtype |              |
| C_13    | OMA8      | OMA       | Ovary (R)           | Macro          | G12C           | 0-0019                 | 0*             |                        |                | Wildtype |              |
| C_13    | OMA8      | OMA       | Ovary (R)           | Macro          | G12D           | 0-022                  | 0-026          | 0-64                   | 0-25           | Wildtype |              |
| C_13    | OMA8      | OMA       | Ovary (R)           | Macro          | G12R           | 0*                     | 0*             |                        |                | Wildtype |              |
| C_13    | OMA8      | OMA       | Ovary (R)           | Macro          | G12V           | 0-018                  | 0-096          | 0-0016                 | 1-1            | Mutant   | G12V         |
| C_13    | OMA8      | OMA       | Ovary (R)           | Macro          | G12A           | 0-0016                 | 0-026          | 0-0061                 | 0-43           | Mutant   | G12A         |
| C_13    | OMA8      | OMA       | Ovary (R)           | Macro          | G12S           | 0-025                  | 0-034          | 1-0                    | 0-29           | Wildtype |              |
| C_13    | SUP4      | SUP       | Uterosacral (L)     | Macro          | G12C           | 0-0019                 | 0*             |                        |                | Wildtype |              |
| C_13    | SUP4      | SUP       | Uterosacral (L)     | Macro          | G12D           | 0-022                  | 0-033          | 0-64                   | 1-1            | Mutant   | G12D         |
| C_13    | SUP4      | SUP       | Uterosacral (L)     | Macro          | G12R           | 0*                     | 0*             |                        |                | Wildtype |              |
| C_13    | SUP4      | SUP       | Uterosacral (L)     | Macro          | G12V           | 0-018                  | 0-0025         |                        |                | Wildtype |              |
| C_13    | SUP4      | SUP       | Uterosacral (L)     | Macro          | G12A           | 0-0016                 | 0*             |                        |                | Wildtype |              |
| C_13    | SUP4      | SUP       | Uterosacral (L)     | Macro          | G12S           | 0-025                  | 0-0050         |                        |                | Wildtype |              |
| C_13    | SUP88     | SUP       | Cul-de-sac          | Macro          | G12C           | 0-0058                 | 0*             |                        |                | Wildtype |              |
| C_13    | SUP88     | SUP       | Cul-de-sac          | Macro          | G12D           | 0-084                  | 0-016          |                        |                | Wildtype |              |
| C_13    | SUP88     | SUP       | Cul-de-sac          | Macro          | G12R           | 0*                     | 0*             |                        |                | Wildtype |              |
| C_13    | SUP88     | SUP       | Cul-de-sac          | Macro          | G12V           | 0-0036                 | 0-0021         |                        |                | Wildtype |              |
| C_13    | SUP88     | SUP       | Cul-de-sac          | Macro          | G12A           | 0-0022                 | 0-0021         |                        |                | Wildtype |              |
| C_13    | SUP88     | SUP       | Cul-de-sac          | Macro          | G12S           | 0-046                  | 0-010          |                        |                | Wildtype |              |
| C_14    | OMA9      | OMA       | Ovary (L)           | Macro          | G12C           | 0-0019                 | 0-0036         | 0-039                  | 0-036          | Wildtype |              |
| C_14    | OMA9      | OMA       | Ovary (L)           | Macro          | G12D           | 0-022                  | 0-041          | 0-64                   | 0-26           | Wildtype |              |

| Case ID | Sample ID | Endo type | Anatomical Location     | Enrich. method | Variant tested | Multi. cut-off VAF (%) | Multi. VAF (%) | Indiv. cut-off VAF (%) | Indiv. VAF (%) | Result   | KRAS Variant |
|---------|-----------|-----------|-------------------------|----------------|----------------|------------------------|----------------|------------------------|----------------|----------|--------------|
| C_14    | OMA9      | OMA       | Ovary (L)               | Macro          | G12R           | 0*                     | 0*             |                        |                | Wildtype |              |
| C_14    | OMA9      | OMA       | Ovary (L)               | Macro          | G12V           | 0-018                  | 0-025          | 0-0016                 | 0-026          | Mutant   | G12V         |
| C_14    | OMA9      | OMA       | Ovary (L)               | Macro          | G12A           | 0-0016                 | 0-0051         | 0-0061                 | 0-0060         | Wildtype |              |
| C_14    | OMA9      | OMA       | Ovary (L)               | Macro          | G12S           | 0-025                  | 0-010          |                        |                | Wildtype |              |
| C_15    | OMA10     | OMA       | Ovary (R)               | Macro          | G12C           | 0-0019                 | 0*             |                        |                | Wildtype |              |
| C_15    | OMA10     | OMA       | Ovary (R)               | Macro          | G12D           | 0-022                  | 0-36           | 0-64                   | 0-98           | Mutant   | G12D         |
| C_15    | OMA10     | OMA       | Ovary (R)               | Macro          | G12R           | 0*                     | 0*             |                        |                | Wildtype |              |
| C_15    | OMA10     | OMA       | Ovary (R)               | Macro          | G12V           | 0-018                  | 3-1            | 0-0016                 | 6-9            | Mutant   | G12V         |
| C_15    | OMA10     | OMA       | Ovary (R)               | Macro          | G12A           | 0-0016                 | 0-020          | 0-0061                 | 0-0059         | Wildtype |              |
| C_15    | OMA10     | OMA       | Ovary (R)               | Macro          | G12S           | 0-025                  | 0-30           | 1-0                    | 0-72           | Wildtype |              |
| C_16    | OMA11     | OMA       | Ovary (B)               | Macro          | G12C           | 0-0019                 | 0*             |                        |                | Wildtype |              |
| C_16    | OMA11     | OMA       | Ovary (B)               | Macro          | G12D           | 0-022                  | 0-015          |                        |                | Wildtype |              |
| C_16    | OMA11     | OMA       | Ovary (B)               | Macro          | G12R           | 0*                     | 0*             |                        |                | Wildtype |              |
| C_16    | OMA11     | OMA       | Ovary (B)               | Macro          | G12V           | 0-018                  | 0-0026         | 0-0016                 | 0-013          | Mutant   | G12V         |
| C_16    | OMA11     | OMA       | Ovary (B)               | Macro          | G12A           | 0-0016                 | 0*             |                        |                | Wildtype |              |
| C_16    | OMA11     | OMA       | Ovary (B)               | Macro          | G12S           | 0-025                  | 0-023          |                        |                | Wildtype |              |
| C_17    | DIE80     | DIE       | Other ill-defined sites | Macro          | G12C           | 0-0020                 | 0*             |                        |                | Wildtype |              |
| C_17    | DIE80     | DIE       | Other ill-defined sites | Macro          | G12D           | 0-0020                 | 0*             | 0-77                   | 0-17           | Wildtype |              |
| C_17    | DIE80     | DIE       | Other ill-defined sites | Macro          | G12R           | 0*                     | 0*             |                        |                | Wildtype |              |
| C_17    | DIE80     | DIE       | Other ill-defined sites | Macro          | G12V           | 0-0060                 | 0*             |                        |                | Wildtype |              |
| C_17    | DIE80     | DIE       | Other ill-defined sites | Macro          | G12A           | 0-0060                 | 0*             |                        |                | Wildtype |              |
| C_17    | DIE80     | DIE       | Other ill-defined sites | Macro          | G12S           | 0-0020                 | 0-0014         | 0-67                   | 0-35           | Wildtype |              |
| C_17    | DIE81     | DIE       | Other ill-defined sites | Macro          | G12C           | 0-017                  | 0*             |                        |                | Wildtype |              |
| C_17    | DIE81     | DIE       | Other ill-defined sites | Macro          | G12D           | 0-13                   | 0*             |                        |                | Wildtype |              |
| C_17    | DIE81     | DIE       | Other ill-defined sites | Macro          | G12R           | 0*                     | 0*             |                        |                | Wildtype |              |
| C_17    | DIE81     | DIE       | Other ill-defined sites | Macro          | G12V           | 0-0060                 | 0*             |                        |                | Wildtype |              |

| Case ID | Sample ID | Endo type | Anatomical Location     | Enrich. method | Variant tested | Multi. cut-off VAF (%) | Multi. VAF (%) | Indiv. cut-off VAF (%) | Indiv. VAF (%) | Result   | KRAS Variant |
|---------|-----------|-----------|-------------------------|----------------|----------------|------------------------|----------------|------------------------|----------------|----------|--------------|
| C_17    | DIE81     | DIE       | Other ill-defined sites | Macro          | G12A           | 0*                     | 0*             |                        |                | Wildtype |              |
| C_17    | DIE81     | DIE       | Other ill-defined sites | Macro          | G12S           | 0.045                  | 0.13           | 0.73                   | 0.76           | Mutant   | G12S         |
| C_17    | DIE82     | DIE       | Pelvic sidewall (R)     | Macro          | G12C           | 0.010                  | 0*             |                        |                | Wildtype |              |
| C_17    | DIE82     | DIE       | Pelvic sidewall (R)     | Macro          | G12D           | 0.043                  | 0.020          |                        |                | Wildtype |              |
| C_17    | DIE82     | DIE       | Pelvic sidewall (R)     | Macro          | G12R           | 0.0016                 | 0*             |                        |                | Wildtype |              |
| C_17    | DIE82     | DIE       | Pelvic sidewall (R)     | Macro          | G12V           | 0.0100                 | 0*             |                        |                | Wildtype |              |
| C_17    | DIE82     | DIE       | Pelvic sidewall (R)     | Macro          | G12A           | 0.0046                 | 0*             |                        |                | Wildtype |              |
| C_17    | DIE82     | DIE       | Pelvic sidewall (R)     | Macro          | G12S           | 0.085                  | 0.32           | 1.2                    | 0.58           | Wildtype |              |
| C_17    | SUP5      | SUP       | Uterosacral (L)         | Macro          | G12C           | 0.0019                 | 0*             |                        |                | Wildtype |              |
| C_17    | SUP5      | SUP       | Uterosacral (L)         | Macro          | G12D           | 0.022                  | 0.0079         |                        |                | Wildtype |              |
| C_17    | SUP5      | SUP       | Uterosacral (L)         | Macro          | G12R           | 0*                     | 0*             |                        |                | Wildtype |              |
| C_17    | SUP5      | SUP       | Uterosacral (L)         | Macro          | G12V           | 0.018                  | 0*             | 0.0016                 | 0*             | Wildtype |              |
| C_17    | SUP5      | SUP       | Uterosacral (L)         | Macro          | G12A           | 0.0016                 | 0*             |                        |                | Wildtype |              |
| C_17    | SUP5      | SUP       | Uterosacral (L)         | Macro          | G12S           | 0.025                  | 0.0059         |                        |                | Wildtype |              |
| C_18    | DIE85     | DIE       | Appendix                | Macro          | G12C           | 0.0020                 | 0*             |                        |                | Wildtype |              |
| C_18    | DIE85     | DIE       | Appendix                | Macro          | G12D           | 0.056                  | 0.010          |                        |                | Wildtype |              |
| C_18    | DIE85     | DIE       | Appendix                | Macro          | G12R           | 0*                     | 0*             |                        |                | Wildtype |              |
| C_18    | DIE85     | DIE       | Appendix                | Macro          | G12V           | 0.0060                 | 0.0035         |                        |                | Wildtype |              |
| C_18    | DIE85     | DIE       | Appendix                | Macro          | G12A           | 0.0060                 | 0*             |                        |                | Wildtype |              |
| C_18    | DIE85     | DIE       | Appendix                | Macro          | G12S           | 0.0020                 | 0.0035         | 0.73                   | 0.42           | Wildtype |              |
| C_18    | OMA12     | OMA       | Ovary (R)               | Macro          | G12C           | 0.0019                 | 0*             |                        |                | Wildtype |              |
| C_18    | OMA12     | OMA       | Ovary (R)               | Macro          | G12D           | 0.022                  | 0.0047         |                        |                | Wildtype |              |
| C_18    | OMA12     | OMA       | Ovary (R)               | Macro          | G12R           | 0*                     | 0*             |                        |                | Wildtype |              |
| C_18    | OMA12     | OMA       | Ovary (R)               | Macro          | G12V           | 0.018                  | 0*             |                        |                | Wildtype |              |
| C_18    | OMA12     | OMA       | Ovary (R)               | Macro          | G12A           | 0.0016                 | 0*             |                        |                | Wildtype |              |
| C_18    | OMA12     | OMA       | Ovary (R)               | Macro          | G12S           | 0.025                  | 0.0024         |                        |                | Wildtype |              |
| C_18    | SUP6      | SUP       | Uterosacral (L)         | Macro          | G12C           | 0.0019                 | 0*             |                        |                | Wildtype |              |
| C_18    | SUP6      | SUP       | Uterosacral (L)         | Macro          | G12D           | 0.022                  | 0.0079         |                        |                | Wildtype |              |

| Case ID | Sample ID | Endo type | Anatomical Location | Enrich. method | Variant tested | Multi. cut-off VAF (%) | Multi. VAF (%) | Indiv. cut-off VAF (%) | Indiv. VAF (%) | Result   | KRAS Variant |
|---------|-----------|-----------|---------------------|----------------|----------------|------------------------|----------------|------------------------|----------------|----------|--------------|
| C_18    | SUP6      | SUP       | Uterosacral (L)     | Macro          | G12R           | 0*                     | 0*             |                        |                | Wildtype |              |
| C_18    | SUP6      | SUP       | Uterosacral (L)     | Macro          | G12V           | 0-018                  | 0-0020         |                        |                | Wildtype |              |
| C_18    | SUP6      | SUP       | Uterosacral (L)     | Macro          | G12A           | 0-0016                 | 0*             |                        |                | Wildtype |              |
| C_18    | SUP6      | SUP       | Uterosacral (L)     | Macro          | G12S           | 0-025                  | 0-0079         |                        |                | Wildtype |              |
| C_19    | DIE96     | DIE       | Cul-de-sac          | LCM            | G12C           | 0-010                  | 0*             |                        |                | Wildtype |              |
| C_19    | DIE96     | DIE       | Cul-de-sac          | LCM            | G12D           | 0-043                  | 0-0068         |                        |                | Wildtype |              |
| C_19    | DIE96     | DIE       | Cul-de-sac          | LCM            | G12R           | 0-0016                 | 0*             |                        |                | Wildtype |              |
| C_19    | DIE96     | DIE       | Cul-de-sac          | LCM            | G12V           | 0-010                  | 0-0023         |                        |                | Wildtype |              |
| C_19    | DIE96     | DIE       | Cul-de-sac          | LCM            | G12A           | 0-0046                 | 0*             |                        |                | Wildtype |              |
| C_19    | DIE96     | DIE       | Cul-de-sac          | LCM            | G12S           | 0-085                  | 0-0068         |                        |                | Wildtype |              |
| C_20    | DIE83     | DIE       | Uterosacral (L)     | Macro          | G12C           | 0-017                  | 0*             | 0-030                  | 0*             | Wildtype |              |
| C_20    | DIE83     | DIE       | Uterosacral (L)     | Macro          | G12D           | 0-13                   | 0-13           | 1-0                    | 0-19           | Wildtype |              |
| C_20    | DIE83     | DIE       | Uterosacral (L)     | Macro          | G12R           | 0*                     | 0*             | 0-0020                 | 0*             | Wildtype |              |
| C_20    | DIE83     | DIE       | Uterosacral (L)     | Macro          | G12V           | 0-013                  | 0*             | 0-010                  | 0*             | Wildtype |              |
| C_20    | DIE83     | DIE       | Uterosacral (L)     | Macro          | G12A           | 0*                     | 0*             | 0-0049                 | 0*             | Wildtype |              |
| C_20    | DIE83     | DIE       | Uterosacral (L)     | Macro          | G12S           | 0-045                  | 0-10           | 0-73                   | 0-26           | Wildtype |              |
| C_20    | DIE84     | DIE       | Cul-de-sac          | Macro          | G12C           | 0-013                  | 0*             |                        |                | Wildtype |              |
| C_20    | DIE84     | DIE       | Cul-de-sac          | Macro          | G12D           | 0-0020                 | 0*             |                        |                | Wildtype |              |
| C_20    | DIE84     | DIE       | Cul-de-sac          | Macro          | G12R           | 0*                     | 0*             |                        |                | Wildtype |              |
| C_20    | DIE84     | DIE       | Cul-de-sac          | Macro          | G12V           | 0-0060                 | 0-050          | 0-019                  | 0-74           | Mutant   | G12V         |
| C_20    | DIE84     | DIE       | Cul-de-sac          | Macro          | G12A           | 0-0060                 | 0*             |                        |                | Wildtype |              |
| C_20    | DIE84     | DIE       | Cul-de-sac          | Macro          | G12S           | 0-0020                 | 0-010          | 0-73                   | 0-48           | Wildtype |              |
| C_20    | SUP7      | SUP       | Pelvic sidewall (L) | Macro          | G12C           | 0-0019                 | 0*             |                        |                | Wildtype |              |
| C_20    | SUP7      | SUP       | Pelvic sidewall (L) | Macro          | G12D           | 0-022                  | 0*             |                        |                | Wildtype |              |
| C_20    | SUP7      | SUP       | Pelvic sidewall (L) | Macro          | G12R           | 0*                     | 0*             |                        |                | Wildtype |              |
| C_20    | SUP7      | SUP       | Pelvic sidewall (L) | Macro          | G12V           | 0-018                  | 0*             |                        |                | Wildtype |              |
| C_20    | SUP7      | SUP       | Pelvic sidewall (L) | Macro          | G12A           | 0-0016                 | 0*             |                        |                | Wildtype |              |
| C_20    | SUP7      | SUP       | Pelvic sidewall (L) | Macro          | G12S           | 0-025                  | 0-016          |                        |                | Wildtype |              |

| Case ID | Sample ID | Endo type | Anatomical Location | Enrich. method | Variant tested | Multi. cut-off VAF (%) | Multi. VAF (%) | Indiv. cut-off VAF (%) | Indiv. VAF (%) | Result   | KRAS Variant |
|---------|-----------|-----------|---------------------|----------------|----------------|------------------------|----------------|------------------------|----------------|----------|--------------|
| C_21    | DIE101    | DIE       | Cul-de-sac          | LCM            | G12C           | 0-010                  | 0*             |                        |                | Wildtype |              |
| C_21    | DIE101    | DIE       | Cul-de-sac          | LCM            | G12D           | 0-043                  | 0-010          |                        |                | Wildtype |              |
| C_21    | DIE101    | DIE       | Cul-de-sac          | LCM            | G12R           | 0-0016                 | 0*             |                        |                | Wildtype |              |
| C_21    | DIE101    | DIE       | Cul-de-sac          | LCM            | G12V           | 0-010                  | 0-0035         | 0-11                   | 0*             | Wildtype |              |
| C_21    | DIE101    | DIE       | Cul-de-sac          | LCM            | G12A           | 0-0046                 | 0-0035         |                        |                | Wildtype |              |
| C_21    | DIE101    | DIE       | Cul-de-sac          | LCM            | G12S           | 0-085                  | 0-028          |                        |                | Wildtype |              |
| C_21    | OMA13     | OMA       | Ovary (R)           | Macro          | G12C           | 0-0019                 | 0-0036         | 0-039                  | 0-0025         | Wildtype |              |
| C_21    | OMA13     | OMA       | Ovary (R)           | Macro          | G12D           | 0-022                  | 0-082          | 0-64                   | 0-79           | Mutant   | G12D         |
| C_21    | OMA13     | OMA       | Ovary (R)           | Macro          | G12R           | 0*                     | 0*             |                        |                | Wildtype |              |
| C_21    | OMA13     | OMA       | Ovary (R)           | Macro          | G12V           | 0-018                  | 0-022          | 0-0016                 | 0*             | Wildtype |              |
| C_21    | OMA13     | OMA       | Ovary (R)           | Macro          | G12A           | 0-0016                 | 0-0071         | 0-0061                 | 0*             | Wildtype |              |
| C_21    | OMA13     | OMA       | Ovary (R)           | Macro          | G12S           | 0-025                  | 0-025          | 1-0                    | 0-26           | Wildtype |              |
| C_22    | DIE6      | DIE       | Cul-de-sac (L)      | LCM            | G12C           | 0-0020                 | 0-31           | 0-55                   | 0-13           | Wildtype |              |
| C_22    | DIE6      | DIE       | Cul-de-sac (L)      | LCM            | G12D           | 0-0020                 | 0-64           | 0-77                   | 4-2            | Mutant   | G12D         |
| C_22    | DIE6      | DIE       | Cul-de-sac (L)      | LCM            | G12R           | 0*                     | 0*             |                        |                | Wildtype |              |
| C_22    | DIE6      | DIE       | Cul-de-sac (L)      | LCM            | G12V           | 0-0060                 | 0*             |                        |                | Wildtype |              |
| C_22    | DIE6      | DIE       | Cul-de-sac (L)      | LCM            | G12A           | 0-0060                 | 0*             |                        |                | Wildtype |              |
| C_22    | DIE6      | DIE       | Cul-de-sac (L)      | LCM            | G12S           | 0-0020                 | 0-047          | 0-67                   | 0-35           | Wildtype |              |
| C_22    | DIE7      | DIE       | Cul-de-sac (R)      | Macro          | G12C           | 0-0020                 | 0-055          | 0-030                  | 0*             | Wildtype |              |
| C_22    | DIE7      | DIE       | Cul-de-sac (R)      | Macro          | G12D           | 0-0020                 | 0-055          | 0-77                   | 1-7            | Mutant   | G12D         |
| C_22    | DIE7      | DIE       | Cul-de-sac (R)      | Macro          | G12R           | 0*                     | 0*             |                        |                | Wildtype |              |
| C_22    | DIE7      | DIE       | Cul-de-sac (R)      | Macro          | G12V           | 0-0060                 | 0*             |                        |                | Wildtype |              |
| C_22    | DIE7      | DIE       | Cul-de-sac (R)      | Macro          | G12A           | 0-0060                 | 0-0021         |                        |                | Wildtype |              |
| C_22    | DIE7      | DIE       | Cul-de-sac (R)      | Macro          | G12S           | 0-0020                 | 0-0080         | 0-73                   | 0-14           | Wildtype |              |
| C_22    | DIE8      | DIE       | Pelvic sidewall (R) | Macro          | G12C           | 0-017                  | 0*             |                        |                | Wildtype |              |
| C_22    | DIE8      | DIE       | Pelvic sidewall (R) | Macro          | G12D           | 0-13                   | 0-038          | 0-77                   | 0-67           | Wildtype |              |
| C_22    | DIE8      | DIE       | Pelvic sidewall (R) | Macro          | G12R           | 0*                     | 0*             |                        |                | Wildtype |              |
| C_22    | DIE8      | DIE       | Pelvic sidewall (R) | Macro          | G12V           | 0-0060                 | 0-0037         |                        |                | Wildtype |              |

| Case ID | Sample ID | Endo type | Anatomical Location | Enrich. method | Variant tested | Multi. cut-off VAF (%) | Multi. VAF (%) | Indiv. cut-off VAF (%) | Indiv. VAF (%) | Result   | KRAS Variant |
|---------|-----------|-----------|---------------------|----------------|----------------|------------------------|----------------|------------------------|----------------|----------|--------------|
| C_22    | DIE8      | DIE       | Pelvic sidewall (R) | Macro          | G12A           | 0*                     | 0-072          | 0-0015                 | 0-60           | Mutant   | G12A         |
| C_22    | DIE8      | DIE       | Pelvic sidewall (R) | Macro          | G12S           | 0-045                  | 0-062          | 0-67                   | 0-39           | Wildtype |              |
| C_22    | DIE9      | DIE       | Rectum              | LCM            | G12C           | 0-0020                 | 0*             | 0-55                   | 0-043          | Wildtype |              |
| C_22    | DIE9      | DIE       | Rectum              | LCM            | G12D           | 0-0020                 | 0-015          | 0-77                   | 0-25           | Wildtype |              |
| C_22    | DIE9      | DIE       | Rectum              | LCM            | G12R           | 0*                     | 0*             |                        |                | Wildtype |              |
| C_22    | DIE9      | DIE       | Rectum              | LCM            | G12V           | 0-0060                 | 0*             |                        |                | Wildtype |              |
| C_22    | DIE9      | DIE       | Rectum              | LCM            | G12A           | 0-0060                 | 0*             |                        |                | Wildtype |              |
| C_22    | DIE9      | DIE       | Rectum              | LCM            | G12S           | 0-0020                 | 0-027          | 0-67                   | 0-24           | Wildtype |              |
| C_22    | DIE10     | DIE       | Cul-de-sac (A)      | Macro          | G12C           | 0-010                  | 0*             |                        |                | Wildtype |              |
| C_22    | DIE10     | DIE       | Cul-de-sac (A)      | Macro          | G12D           | 0-043                  | 0-049          | 0-74                   | 0-24           | Wildtype |              |
| C_22    | DIE10     | DIE       | Cul-de-sac (A)      | Macro          | G12R           | 0-0016                 | 0*             |                        |                | Wildtype |              |
| C_22    | DIE10     | DIE       | Cul-de-sac (A)      | Macro          | G12V           | 0-010                  | 0-0054         |                        |                | Wildtype |              |
| C_22    | DIE10     | DIE       | Cul-de-sac (A)      | Macro          | G12A           | 0-0046                 | 0*             |                        |                | Wildtype |              |
| C_22    | DIE10     | DIE       | Cul-de-sac (A)      | Macro          | G12S           | 0-085                  | 0-032          | 1-2                    | 0-15           | Wildtype |              |
| C_23    | SUP8      | SUP       | Cul-de-sac          | Macro          | G12C           | 0-0041                 | 0*             |                        |                | Wildtype |              |
| C_23    | SUP8      | SUP       | Cul-de-sac          | Macro          | G12D           | 0-018                  | 0-023          | 0-73                   | 0-22           | Wildtype |              |
| C_23    | SUP8      | SUP       | Cul-de-sac          | Macro          | G12R           | 0-0014                 | 0*             |                        |                | Wildtype |              |
| C_23    | SUP8      | SUP       | Cul-de-sac          | Macro          | G12V           | 0-00070                | 0*             |                        |                | Wildtype |              |
| C_23    | SUP8      | SUP       | Cul-de-sac          | Macro          | G12A           | 0*                     | 0*             |                        |                | Wildtype |              |
| C_23    | SUP8      | SUP       | Cul-de-sac          | Macro          | G12S           | 0-033                  | 0-027          |                        |                | Wildtype |              |
| C_24    | DIE4      | DIE       | Uterosacral (R)     | LCM            | G12C           | 0-010                  | 0-0097         |                        |                | Wildtype |              |
| C_24    | DIE4      | DIE       | Uterosacral (R)     | LCM            | G12D           | 0-043                  | 0-029          |                        |                | Wildtype |              |
| C_24    | DIE4      | DIE       | Uterosacral (R)     | LCM            | G12R           | 0-0016                 | 0*             |                        |                | Wildtype |              |
| C_24    | DIE4      | DIE       | Uterosacral (R)     | LCM            | G12V           | 0-010                  | 0*             |                        |                | Wildtype |              |
| C_24    | DIE4      | DIE       | Uterosacral (R)     | LCM            | G12A           | 0-0046                 | 0*             |                        |                | Wildtype |              |
| C_24    | DIE4      | DIE       | Uterosacral (R)     | LCM            | G12S           | 0-085                  | 0-20           | 0-67                   | 0-19           | Wildtype |              |
| C_24    | DIE5      | DIE       | Vagina              | Macro          | G12C           | 0-0020                 | 0-0016         |                        |                | Wildtype |              |
| C_24    | DIE5      | DIE       | Vagina              | Macro          | G12D           | 0-0020                 | 0-0018         |                        |                | Wildtype |              |

| Case ID | Sample ID | Endo type | Anatomical Location | Enrich. method | Variant tested | Multi. cut-off VAF (%)       | Multi. VAF (%)               | Indiv. cut-off VAF (%) | Indiv. VAF (%) | Result   | KRAS Variant |
|---------|-----------|-----------|---------------------|----------------|----------------|------------------------------|------------------------------|------------------------|----------------|----------|--------------|
| C_24    | DIE5      | DIE       | Vagina              | Macro          | G12R           | 0*                           | 0*                           |                        |                | Wildtype |              |
| C_24    | DIE5      | DIE       | Vagina              | Macro          | G12V           | 0-0060                       | 0*                           |                        |                | Wildtype |              |
| C_24    | DIE5      | DIE       | Vagina              | Macro          | G12A           | 0-0060                       | 0*                           |                        |                | Wildtype |              |
| C_24    | DIE5      | DIE       | Vagina              | Macro          | G12S           | 0-0020                       | 0-0033                       | 0-73                   | 0-18           | Wildtype |              |
| C_25    | OMA2      | OMA       | Ovary (L)           | Macro          | G12C           | 0-010                        | 0*                           |                        |                | Wildtype |              |
| C_25    | OMA2      | OMA       | Ovary (L)           | Macro          | G12D           | 0-043                        | 0-030                        | 0-74                   | 0-23           | Wildtype |              |
| C_25    | OMA2      | OMA       | Ovary (L)           | Macro          | G12R           | 0-0016                       | 0*                           |                        |                | Wildtype |              |
| C_25    | OMA2      | OMA       | Ovary (L)           | Macro          | G12V           | 0-010                        | 0*                           |                        |                | Wildtype |              |
| C_25    | OMA2      | OMA       | Ovary (L)           | Macro          | G12A           | 0-0046                       | 0*                           |                        |                | Wildtype |              |
| C_25    | OMA2      | OMA       | Ovary (L)           | Macro          | G12S           | 0-085                        | 0-040                        | 1-2                    | 0-38           | Wildtype |              |
| C_25    | SUP9      | SUP       | Cul-de-sac          | Macro          | G12C           | 0-0041                       | 0*                           |                        |                | Wildtype |              |
| C_25    | SUP9      | SUP       | Cul-de-sac          | Macro          | G12D           | 0-018                        | 0*                           |                        |                | Wildtype |              |
| C_25    | SUP9      | SUP       | Cul-de-sac          | Macro          | G12R           | 0-0014                       | 0*                           |                        |                | Wildtype |              |
| C_25    | SUP9      | SUP       | Cul-de-sac          | Macro          | G12V           | failed - not enough droplets | failed - not enough droplets | 0-0060                 | 1-7            | Mutant   | G12V         |
| C_25    | SUP9      | SUP       | Cul-de-sac          | Macro          | G12A           | 0*                           | 0*                           |                        |                | Wildtype |              |
| C_25    | SUP9      | SUP       | Cul-de-sac          | Macro          | G12S           | failed - not enough droplets | failed - not enough droplets | 0-44                   | 0-91           | Mutant   | G12S         |
| C_26    | DIE72     | DIE       | Rectum              | Macro          | G12C           | 0-013                        | 0*                           |                        |                | Wildtype |              |
| C_26    | DIE72     | DIE       | Rectum              | Macro          | G12D           | 0-0020                       | 0-0079                       | 0-77                   | 0-49           | Wildtype |              |
| C_26    | DIE72     | DIE       | Rectum              | Macro          | G12R           | 0*                           | 0*                           |                        |                | Wildtype |              |
| C_26    | DIE72     | DIE       | Rectum              | Macro          | G12V           | 0-0060                       | 0*                           |                        |                | Wildtype |              |
| C_26    | DIE72     | DIE       | Rectum              | Macro          | G12A           | 0-0060                       | 0*                           |                        |                | Wildtype |              |
| C_26    | DIE72     | DIE       | Rectum              | Macro          | G12S           | 0-0020                       | 0-031                        | 0-73                   | 0-17           | Wildtype |              |
| C_26    | DIE73     | DIE       | Rectum              | Macro          | G12C           | 0-013                        | 0*                           |                        |                | Wildtype |              |
| C_26    | DIE73     | DIE       | Rectum              | Macro          | G12D           | 0-0020                       | 0-068                        | 0-77                   | 0-36           | Wildtype |              |
| C_26    | DIE73     | DIE       | Rectum              | Macro          | G12R           | 0*                           | 0*                           |                        |                | Wildtype |              |



| Case ID | Sample ID | Endo type | Anatomical Location | Enrich. method | Variant tested | Multi. cut-off VAF (%) | Multi. VAF (%) | Indiv. cut-off VAF (%) | Indiv. VAF (%) | Result   | KRAS Variant |
|---------|-----------|-----------|---------------------|----------------|----------------|------------------------|----------------|------------------------|----------------|----------|--------------|
| C_26    | DIE73     | DIE       | Rectum              | Macro          | G12V           | 0-0060                 | 0*             |                        |                | Wildtype |              |
| C_26    | DIE73     | DIE       | Rectum              | Macro          | G12A           | 0-0060                 | 0*             |                        |                | Wildtype |              |
| C_26    | DIE73     | DIE       | Rectum              | Macro          | G12S           | 0-0020                 | 0-14           | 0-67                   | 0-50           | Wildtype |              |
| C_26    | DIE74     | DIE       | Cul-de-sac (L)      | LCM            | G12C           | 0-010                  | 0*             |                        |                | Wildtype |              |
| C_26    | DIE74     | DIE       | Cul-de-sac (L)      | LCM            | G12D           | 0-043                  | 0-065          | 0-74                   | 0-31           | Wildtype |              |
| C_26    | DIE74     | DIE       | Cul-de-sac (L)      | LCM            | G12R           | 0-0016                 | 0*             |                        |                | Wildtype |              |
| C_26    | DIE74     | DIE       | Cul-de-sac (L)      | LCM            | G12V           | 0-010                  | 0-0038         |                        |                | Wildtype |              |
| C_26    | DIE74     | DIE       | Cul-de-sac (L)      | LCM            | G12A           | 0-0046                 | 0*             |                        |                | Wildtype |              |
| C_26    | DIE74     | DIE       | Cul-de-sac (L)      | LCM            | G12S           | 0-085                  | 0-015          |                        |                | Wildtype |              |
| C_26    | DIE75     | DIE       | Cul-de-sac (L)      | Macro          | G12C           | 0-017                  | 0*             |                        |                | Wildtype |              |
| C_26    | DIE75     | DIE       | Cul-de-sac (L)      | Macro          | G12D           | 0-13                   | 0*             |                        |                | Wildtype |              |
| C_26    | DIE75     | DIE       | Cul-de-sac (L)      | Macro          | G12R           | 0*                     | 0*             |                        |                | Wildtype |              |
| C_26    | DIE75     | DIE       | Cul-de-sac (L)      | Macro          | G12V           | 0-013                  | 0-024          | 0-010                  | 0*             | Wildtype |              |
| C_26    | DIE75     | DIE       | Cul-de-sac (L)      | Macro          | G12A           | 0*                     | 0*             |                        |                | Wildtype |              |
| C_26    | DIE75     | DIE       | Cul-de-sac (L)      | Macro          | G12S           | 0-045                  | 0-097          | 0-67                   | 0-16           | Wildtype |              |
| C_26    | DIE76     | DIE       | Cul-de-sac (L)      | Macro          | G12C           | 0-017                  | 0*             |                        |                | Wildtype |              |
| C_26    | DIE76     | DIE       | Cul-de-sac (L)      | Macro          | G12D           | 0-13                   | 0-12           | 0-77                   | 0-12           | Wildtype |              |
| C_26    | DIE76     | DIE       | Cul-de-sac (L)      | Macro          | G12R           | 0*                     | 0*             |                        |                | Wildtype |              |
| C_26    | DIE76     | DIE       | Cul-de-sac (L)      | Macro          | G12V           | 0-013                  | 0*             |                        |                | Wildtype |              |
| C_26    | DIE76     | DIE       | Cul-de-sac (L)      | Macro          | G12A           | 0*                     | 0*             |                        |                | Wildtype |              |
| C_26    | DIE76     | DIE       | Cul-de-sac (L)      | Macro          | G12S           | 0-045                  | 0-17           | 0-67                   | 0-33           | Wildtype |              |
| C_26    | DIE77     | DIE       | Pelvic sidewall (R) | LCM            | G12C           | 0-010                  | 0*             |                        |                | Wildtype |              |
| C_26    | DIE77     | DIE       | Pelvic sidewall (R) | LCM            | G12D           | 0-043                  | 0-018          |                        |                | Wildtype |              |
| C_26    | DIE77     | DIE       | Pelvic sidewall (R) | LCM            | G12R           | 0-0016                 | 0*             |                        |                | Wildtype |              |
| C_26    | DIE77     | DIE       | Pelvic sidewall (R) | LCM            | G12V           | 0-010                  | 0*             |                        |                | Wildtype |              |
| C_26    | DIE77     | DIE       | Pelvic sidewall (R) | LCM            | G12A           | 0-0046                 | 0*             |                        |                | Wildtype |              |
| C_26    | DIE77     | DIE       | Pelvic sidewall (R) | LCM            | G12S           | 0-0084                 | 0-16           | 0-53                   | 0-50           | Wildtype |              |
| C_26    | DIE78     | DIE       | Pelvic sidewall (L) | LCM            | G12C           | 0-010                  | 0*             |                        |                | Wildtype |              |

| Case ID | Sample ID | Endo type | Anatomical Location | Enrich. method | Variant tested | Multi. cut-off VAF (%) | Multi. VAF (%) | Indiv. cut-off VAF (%) | Indiv. VAF (%) | Result   | KRAS Variant |
|---------|-----------|-----------|---------------------|----------------|----------------|------------------------|----------------|------------------------|----------------|----------|--------------|
| C_26    | DIE78     | DIE       | Pelvic sidewall (L) | LCM            | G12D           | 0.043                  | 0.012          |                        |                | Wildtype |              |
| C_26    | DIE78     | DIE       | Pelvic sidewall (L) | LCM            | G12R           | 0.0016                 | 0.0077         | 0.020                  | 0.016          | Wildtype |              |
| C_26    | DIE78     | DIE       | Pelvic sidewall (L) | LCM            | G12V           | 0.010                  | 0.0039         |                        |                | Wildtype |              |
| C_26    | DIE78     | DIE       | Pelvic sidewall (L) | LCM            | G12A           | 0.0046                 | 0*             |                        |                | Wildtype |              |
| C_26    | DIE78     | DIE       | Pelvic sidewall (L) | LCM            | G12S           | 0.085                  | 0.066          | 1.2                    | 0.38           | Wildtype |              |
| C_27    | SUP75     | SUP       | Pelvic sidewall (R) | Macro          | G12C           | 0*                     | 0*             |                        |                | Wildtype |              |
| C_27    | SUP75     | SUP       | Pelvic sidewall (R) | Macro          | G12D           | 0.043                  | 0*             |                        |                | Wildtype |              |
| C_27    | SUP75     | SUP       | Pelvic sidewall (R) | Macro          | G12R           | 0*                     | 0*             |                        |                | Wildtype |              |
| C_27    | SUP75     | SUP       | Pelvic sidewall (R) | Macro          | G12V           | 0.0020                 | 0*             |                        |                | Wildtype |              |
| C_27    | SUP75     | SUP       | Pelvic sidewall (R) | Macro          | G12A           | 0*                     | 0.0015         | 0.0022                 | 0.0013         | Wildtype |              |
| C_27    | SUP75     | SUP       | Pelvic sidewall (R) | Macro          | G12S           | 0.031                  | 0.0047         |                        |                | Wildtype |              |
| C_27    | SUP89     | SUP       | Pelvic sidewall (R) | Macro          | G12C           | 0*                     | 0*             |                        |                | Wildtype |              |
| C_27    | SUP89     | SUP       | Pelvic sidewall (R) | Macro          | G12D           | 0.043                  | 0.040          | 1.5                    | 0.33           | Wildtype |              |
| C_27    | SUP89     | SUP       | Pelvic sidewall (R) | Macro          | G12R           | 0*                     | 0*             |                        |                | Wildtype |              |
| C_27    | SUP89     | SUP       | Pelvic sidewall (R) | Macro          | G12V           | 0.0020                 | 0.0091         | 0.0039                 | 0.0074         | Mutant   | G12V         |
| C_27    | SUP89     | SUP       | Pelvic sidewall (R) | Macro          | G12A           | 0*                     | 0*             |                        |                | Wildtype |              |
| C_27    | SUP89     | SUP       | Pelvic sidewall (R) | Macro          | G12S           | 0.031                  | 0.040          | 0.78                   | 0.42           | Wildtype |              |
| C_28    | DIE99     | DIE       | Uterosacral (L)     | Macro          | G12C           | 0.010                  | 0*             |                        |                | Wildtype |              |
| C_28    | DIE99     | DIE       | Uterosacral (L)     | Macro          | G12D           | 0.043                  | 0.13           | 0.74                   | 0.13           | Wildtype |              |
| C_28    | DIE99     | DIE       | Uterosacral (L)     | Macro          | G12R           | 0.0016                 | 0*             |                        |                | Wildtype |              |
| C_28    | DIE99     | DIE       | Uterosacral (L)     | Macro          | G12V           | 0.010                  | 0.015          | 0.11                   | 0.12           | Mutant   | G12V         |
| C_28    | DIE99     | DIE       | Uterosacral (L)     | Macro          | G12A           | 0.0046                 | 0*             |                        |                | Wildtype |              |
| C_28    | DIE99     | DIE       | Uterosacral (L)     | Macro          | G12S           | 0.085                  | 0.044          |                        |                | Wildtype |              |
| C_28    | DIE100    | DIE       | Uterosacral (R)     | LCM            | G12C           | 0.010                  | 0*             |                        |                | Wildtype |              |
| C_28    | DIE100    | DIE       | Uterosacral (R)     | LCM            | G12D           | 0.042                  | 0.27           | 0.69                   | 0.92           | Mutant   | G12D         |
| C_28    | DIE100    | DIE       | Uterosacral (R)     | LCM            | G12R           | 0.0016                 | 0*             |                        |                | Wildtype |              |
| C_28    | DIE100    | DIE       | Uterosacral (R)     | LCM            | G12V           | 0.010                  | 0*             |                        |                | Wildtype |              |
| C_28    | DIE100    | DIE       | Uterosacral (R)     | LCM            | G12A           | 0.0046                 | 0*             |                        |                | Wildtype |              |

| Case ID | Sample ID | Endo type | Anatomical Location | Enrich. method | Variant tested | Multi. cut-off VAF (%) | Multi. VAF (%) | Indiv. cut-off VAF (%) | Indiv. VAF (%) | Result   | KRAS Variant |
|---------|-----------|-----------|---------------------|----------------|----------------|------------------------|----------------|------------------------|----------------|----------|--------------|
| C_28    | DIE100    | DIE       | Uterosacral (R)     | LCM            | G12S           | 0.085                  | 0.078          |                        |                | Wildtype |              |
| C_28    | SUP47     | SUP       | Cul-de-sac          | Macro          | G12C           | 0*                     | 0*             |                        |                | Wildtype |              |
| C_28    | SUP47     | SUP       | Cul-de-sac          | Macro          | G12D           | 0.027                  | 0.0049         |                        |                | Wildtype |              |
| C_28    | SUP47     | SUP       | Cul-de-sac          | Macro          | G12R           | 0*                     | 0*             |                        |                | Wildtype |              |
| C_28    | SUP47     | SUP       | Cul-de-sac          | Macro          | G12V           | 0*                     | 0*             |                        |                | Wildtype |              |
| C_28    | SUP47     | SUP       | Cul-de-sac          | Macro          | G12A           | 0.0021                 | 0.0024         | 0*                     | 0.026          | Mutant   | G12A         |
| C_28    | SUP47     | SUP       | Cul-de-sac          | Macro          | G12S           | 0.021                  | 0.0050         |                        |                | Wildtype |              |
| C_29    | OMA29     | OMA       | Ovary (R)           | Macro          | G12C           | 0*                     | 0*             |                        |                | Wildtype |              |
| C_29    | OMA29     | OMA       | Ovary (R)           | Macro          | G12D           | 0.043                  | 0*             |                        |                | Wildtype |              |
| C_29    | OMA29     | OMA       | Ovary (R)           | Macro          | G12R           | 0*                     | 0*             |                        |                | Wildtype |              |
| C_29    | OMA29     | OMA       | Ovary (R)           | Macro          | G12V           | 0.0020                 | 0.018          |                        |                | Wildtype |              |
| C_29    | OMA29     | OMA       | Ovary (R)           | Macro          | G12A           | 0*                     | 0.0018         | 0.0022                 | 0*             | Wildtype |              |
| C_29    | OMA29     | OMA       | Ovary (R)           | Macro          | G12S           | 0.031                  | 0.0055         |                        |                | Wildtype |              |
| C_30    | SUP10     | SUP       | Uterosacral (R)     | Macro          | G12C           | 0.0041                 | 0*             |                        |                | Wildtype |              |
| C_30    | SUP10     | SUP       | Uterosacral (R)     | Macro          | G12D           | 0.018                  | 0.0056         |                        |                | Wildtype |              |
| C_30    | SUP10     | SUP       | Uterosacral (R)     | Macro          | G12R           | 0.0014                 | 0*             |                        |                | Wildtype |              |
| C_30    | SUP10     | SUP       | Uterosacral (R)     | Macro          | G12V           | 0.00070                | 0*             |                        |                | Wildtype |              |
| C_30    | SUP10     | SUP       | Uterosacral (R)     | Macro          | G12A           | 0*                     | 0*             |                        |                | Wildtype |              |
| C_30    | SUP10     | SUP       | Uterosacral (R)     | Macro          | G12S           | 0.033                  | 0.011          |                        |                | Wildtype |              |
| C_30    | SUP90     | SUP       | Pelvic sidewall (R) | Macro          | G12C           | 0*                     | 0*             |                        |                | Wildtype |              |
| C_30    | SUP90     | SUP       | Pelvic sidewall (R) | Macro          | G12D           | 0.043                  | 0.063          | 1.5                    | 0.36           | Wildtype |              |
| C_30    | SUP90     | SUP       | Pelvic sidewall (R) | Macro          | G12R           | 0*                     | 0*             |                        |                | Wildtype |              |
| C_30    | SUP90     | SUP       | Pelvic sidewall (R) | Macro          | G12V           | 0.0020                 | 0.0085         | 0.0039                 | 0.0030         | Wildtype |              |
| C_30    | SUP90     | SUP       | Pelvic sidewall (R) | Macro          | G12A           | 0*                     | 0.0028         | 0.0022                 | 0*             | Wildtype |              |
| C_30    | SUP90     | SUP       | Pelvic sidewall (R) | Macro          | G12S           | 0.031                  | 0.0057         |                        |                | Wildtype |              |
| C_31    | OMA14     | OMA       | Ovary (R)           | Macro          | G12C           | 0.0019                 | 0.0062         | 0.039                  | 0.0041         | Wildtype |              |
| C_31    | OMA14     | OMA       | Ovary (R)           | Macro          | G12D           | 0.022                  | 0.78           | 0.64                   | 2.8            | Mutant   | G12D         |
| C_31    | OMA14     | OMA       | Ovary (R)           | Macro          | G12R           | 0*                     | 0*             |                        |                | Wildtype |              |

| Case ID | Sample ID | Endo type | Anatomical Location | Enrich. method | Variant tested | Multi. cut-off VAF (%) | Multi. VAF (%) | Indiv. cut-off VAF (%) | Indiv. VAF (%) | Result   | KRAS Variant |
|---------|-----------|-----------|---------------------|----------------|----------------|------------------------|----------------|------------------------|----------------|----------|--------------|
| C_31    | OMA14     | OMA       | Ovary (R)           | Macro          | G12V           | 0.018                  | 0.025          | 0.0016                 | 0.0045         | Mutant   | G12V         |
| C_31    | OMA14     | OMA       | Ovary (R)           | Macro          | G12A           | 0.0016                 | 0.0062         | 0.0061                 | 0.0050         | Wildtype |              |
| C_31    | OMA14     | OMA       | Ovary (R)           | Macro          | G12S           | 0.025                  | 0.056          | 1.0                    | 0.25           | Wildtype |              |
| C_31    | OMA42     | OMA       | Ovary (L)           | Macro          | G12C           | 0.0058                 | 0*             |                        |                | Wildtype |              |
| C_31    | OMA42     | OMA       | Ovary (L)           | Macro          | G12D           | 0.084                  | 0.40           | 0.98                   | 3.7            | Mutant   | G12D         |
| C_31    | OMA42     | OMA       | Ovary (L)           | Macro          | G12R           | 0*                     | 0.0058         | 0.0020                 | 0.070          | Mutant   | G12R         |
| C_31    | OMA42     | OMA       | Ovary (L)           | Macro          | G12V           | 0.0036                 | 0.061          | 0.0053                 | 0.59           | Mutant   | G12V         |
| C_31    | OMA42     | OMA       | Ovary (L)           | Macro          | G12A           | 0.0022                 | 0*             |                        |                | Wildtype |              |
| C_31    | OMA42     | OMA       | Ovary (L)           | Macro          | G12S           | 0.046                  | 0.020          |                        |                | Wildtype |              |
| C_31    | SUP11     | SUP       | Pelvic sidewall (L) | Macro          | G12C           | 0.0041                 | 0*             |                        |                | Wildtype |              |
| C_31    | SUP11     | SUP       | Pelvic sidewall (L) | Macro          | G12D           | 0.018                  | 0.17           | 0.73                   | 0.56           | Wildtype |              |
| C_31    | SUP11     | SUP       | Pelvic sidewall (L) | Macro          | G12R           | 0.0014                 | 0*             |                        |                | Wildtype |              |
| C_31    | SUP11     | SUP       | Pelvic sidewall (L) | Macro          | G12V           | 0.00070                | 0.011          | 0.0060                 | 0*             | Wildtype |              |
| C_31    | SUP11     | SUP       | Pelvic sidewall (L) | Macro          | G12A           | 0*                     | 0*             |                        |                | Wildtype |              |
| C_31    | SUP11     | SUP       | Pelvic sidewall (L) | Macro          | G12S           | 0.033                  | 0.18           | 0.44                   | 0.49           | Mutant   | G12S         |
| C_32    | DIE88     | DIE       | Cul-de-sac          | Macro          | G12C           | 0.010                  | 0*             |                        |                | Wildtype |              |
| C_32    | DIE88     | DIE       | Cul-de-sac          | Macro          | G12D           | 0.043                  | 0.029          | 0.74                   | 0.31           | Wildtype |              |
| C_32    | DIE88     | DIE       | Cul-de-sac          | Macro          | G12R           | 0.0016                 | 0.0058         | 0.020                  | 0.016          | Wildtype |              |
| C_32    | DIE88     | DIE       | Cul-de-sac          | Macro          | G12V           | 0.010                  | 0*             |                        |                | Wildtype |              |
| C_32    | DIE88     | DIE       | Cul-de-sac          | Macro          | G12A           | 0.0046                 | 0*             |                        |                | Wildtype |              |
| C_32    | DIE88     | DIE       | Cul-de-sac          | Macro          | G12S           | 0.085                  | 0.037          | 1.2                    | 0.39           | Wildtype |              |
| C_32    | OMA30     | OMA       | Ovary (L)           | Macro          | G12C           | 0*                     | 0.0018         | 0.030                  | 0.025          | Wildtype |              |
| C_32    | OMA30     | OMA       | Ovary (L)           | Macro          | G12D           | 0.043                  | 0.011          |                        |                | Wildtype |              |
| C_32    | OMA30     | OMA       | Ovary (L)           | Macro          | G12R           | 0*                     | 0*             |                        |                | Wildtype |              |
| C_32    | OMA30     | OMA       | Ovary (L)           | Macro          | G12V           | 0.0020                 | 0.0068         | 0.0039                 | 0.048          | Mutant   | G12V         |
| C_32    | OMA30     | OMA       | Ovary (L)           | Macro          | G12A           | 0*                     | 0*             |                        |                | Wildtype |              |
| C_32    | OMA30     | OMA       | Ovary (L)           | Macro          | G12S           | 0.031                  | 0.0089         |                        |                | Wildtype |              |
| C_32    | SUP77     | SUP       | Cul-de-sac          | Macro          | G12C           | 0*                     | 0*             |                        |                | Wildtype |              |

| Case ID | Sample ID | Endo type | Anatomical Location | Enrich. method | Variant tested | Multi. cut-off VAF (%) | Multi. VAF (%) | Indiv. cut-off VAF (%) | Indiv. VAF (%) | Result   | KRAS Variant |
|---------|-----------|-----------|---------------------|----------------|----------------|------------------------|----------------|------------------------|----------------|----------|--------------|
| C_32    | SUP77     | SUP       | Cul-de-sac          | Macro          | G12D           | 0.043                  | 0*             |                        |                | Wildtype |              |
| C_32    | SUP77     | SUP       | Cul-de-sac          | Macro          | G12R           | 0*                     | 0*             |                        |                | Wildtype |              |
| C_32    | SUP77     | SUP       | Cul-de-sac          | Macro          | G12V           | 0.0020                 | 0*             |                        |                | Wildtype |              |
| C_32    | SUP77     | SUP       | Cul-de-sac          | Macro          | G12A           | 0*                     | 0*             |                        |                | Wildtype |              |
| C_32    | SUP77     | SUP       | Cul-de-sac          | Macro          | G12S           | 0.031                  | 0*             |                        |                | Wildtype |              |
| C_33    | DIE93     | DIE       | Uterosacral (R)     | LCM            | G12C           | 0.010                  | 0.0078         |                        |                | Wildtype |              |
| C_33    | DIE93     | DIE       | Uterosacral (R)     | LCM            | G12D           | 0.043                  | 0.047          | 0.69                   | 0.39           | Wildtype |              |
| C_33    | DIE93     | DIE       | Uterosacral (R)     | LCM            | G12R           | 0.0016                 | 0*             |                        |                | Wildtype |              |
| C_33    | DIE93     | DIE       | Uterosacral (R)     | LCM            | G12V           | 0.010                  | 0.0078         |                        |                | Wildtype |              |
| C_33    | DIE93     | DIE       | Uterosacral (R)     | LCM            | G12A           | 0.0046                 | 0*             |                        |                | Wildtype |              |
| C_33    | DIE93     | DIE       | Uterosacral (R)     | LCM            | G12S           | 0.085                  | 0.10           | 0.53                   | 0.35           | Wildtype |              |
| C_33    | DIE94     | DIE       | Uterosacral (L)     | LCM            | G12C           | 0.010                  | 0*             |                        |                | Wildtype |              |
| C_33    | DIE94     | DIE       | Uterosacral (L)     | LCM            | G12D           | 0.043                  | 2.7            | 0.90                   | 3.96           | Mutant   | G12D         |
| C_33    | DIE94     | DIE       | Uterosacral (L)     | LCM            | G12R           | 0.0016                 | 0*             |                        |                | Wildtype |              |
| C_33    | DIE94     | DIE       | Uterosacral (L)     | LCM            | G12V           | 0.010                  | 0.011          | 0.010                  | 0*             | Wildtype |              |
| C_33    | DIE94     | DIE       | Uterosacral (L)     | LCM            | G12A           | 0.0046                 | 0*             |                        |                | Wildtype |              |
| C_33    | DIE94     | DIE       | Uterosacral (L)     | LCM            | G12S           | 0.085                  | 0.24           | 1.2                    | 0.24           | Wildtype |              |
| C_33    | DIE95     | DIE       | Uterosacral (L)     | Macro          | G12C           | 0.010                  | 0*             |                        |                | Wildtype |              |
| C_33    | DIE95     | DIE       | Uterosacral (L)     | Macro          | G12D           | 0.042                  | 0.94           | 0.69                   | 1.5            | Mutant   | G12D         |
| C_33    | DIE95     | DIE       | Uterosacral (L)     | Macro          | G12R           | 0.0016                 | 0*             |                        |                | Wildtype |              |
| C_33    | DIE95     | DIE       | Uterosacral (L)     | Macro          | G12V           | 0.010                  | 0*             |                        |                | Wildtype |              |
| C_33    | DIE95     | DIE       | Uterosacral (L)     | Macro          | G12A           | 0.0046                 | 0*             |                        |                | Wildtype |              |
| C_33    | DIE95     | DIE       | Uterosacral (L)     | Macro          | G12S           | 0.0084                 | 0.55           | 0.53                   | 0.70           | Mutant   | G12S         |
| C_33    | SUP12     | SUP       | Pelvic sidewall (R) | Macro          | G12C           | 0.0041                 | 0*             |                        |                | Wildtype |              |
| C_33    | SUP12     | SUP       | Pelvic sidewall (R) | Macro          | G12D           | 0.018                  | 0.042          | 0.73                   | 0.40           | Wildtype |              |
| C_33    | SUP12     | SUP       | Pelvic sidewall (R) | Macro          | G12R           | 0.0014                 | 0*             |                        |                | Wildtype |              |
| C_33    | SUP12     | SUP       | Pelvic sidewall (R) | Macro          | G12V           | 0.0007                 | 0.011          | 0.0060                 | 0*             | Wildtype |              |
| C_33    | SUP12     | SUP       | Pelvic sidewall (R) | Macro          | G12A           | 0*                     | 0*             |                        |                | Wildtype |              |

| Case ID | Sample ID | Endo type | Anatomical Location | Enrich. method | Variant tested | Multi. cut-off VAF (%) | Multi. VAF (%) | Indiv. cut-off VAF (%) | Indiv. VAF (%) | Result   | KRAS Variant |
|---------|-----------|-----------|---------------------|----------------|----------------|------------------------|----------------|------------------------|----------------|----------|--------------|
| C_33    | SUP12     | SUP       | Pelvic sidewall (R) | Macro          | G12S           | 0.033                  | 0.034          | 0.44                   | 0.41           | Wildtype |              |
| C_33    | SUP91     | SUP       | Pelvic sidewall (L) | Macro          | G12C           | 0.0058                 | 0*             |                        |                | Wildtype |              |
| C_33    | SUP91     | SUP       | Pelvic sidewall (L) | Macro          | G12D           | 0.084                  | 0.035          |                        |                | Wildtype |              |
| C_33    | SUP91     | SUP       | Pelvic sidewall (L) | Macro          | G12R           | 0*                     | 0*             |                        |                | Wildtype |              |
| C_33    | SUP91     | SUP       | Pelvic sidewall (L) | Macro          | G12V           | 0.0036                 | 0.0027         |                        |                | Wildtype |              |
| C_33    | SUP91     | SUP       | Pelvic sidewall (L) | Macro          | G12A           | 0.0022                 | 0*             |                        |                | Wildtype |              |
| C_33    | SUP91     | SUP       | Pelvic sidewall (L) | Macro          | G12S           | 0.046                  | 0.029          |                        |                | Wildtype |              |
| C_34    | OMA3      | OMA       | Ovary (L)           | Macro          | G12C           | 0*                     | 0*             |                        |                | Wildtype |              |
| C_34    | OMA3      | OMA       | Ovary (L)           | Macro          | G12D           | 0.043                  | 0.0032         |                        |                | Wildtype |              |
| C_34    | OMA3      | OMA       | Ovary (L)           | Macro          | G12R           | 0*                     | 0*             |                        |                | Wildtype |              |
| C_34    | OMA3      | OMA       | Ovary (L)           | Macro          | G12V           | 0.0020                 | 0.0016         |                        |                | Wildtype |              |
| C_34    | OMA3      | OMA       | Ovary (L)           | Macro          | G12A           | 0*                     | 0*             |                        |                | Wildtype |              |
| C_34    | OMA3      | OMA       | Ovary (L)           | Macro          | G12S           | 0.031                  | 0.020          |                        |                | Wildtype |              |
| C_34    | SUP13     | SUP       | Cul-de-sac          | Macro          | G12C           | 0.0041                 | 0*             |                        |                | Wildtype |              |
| C_34    | SUP13     | SUP       | Cul-de-sac          | Macro          | G12D           | 0.018                  | 0.0043         |                        |                | Wildtype |              |
| C_34    | SUP13     | SUP       | Cul-de-sac          | Macro          | G12R           | 0.0014                 | 0*             |                        |                | Wildtype |              |
| C_34    | SUP13     | SUP       | Cul-de-sac          | Macro          | G12V           | 0.0007                 | 0.0043         | 0.0060                 | 0.0043         | Wildtype |              |
| C_34    | SUP13     | SUP       | Cul-de-sac          | Macro          | G12A           | 0*                     | 0*             |                        |                | Wildtype |              |
| C_34    | SUP13     | SUP       | Cul-de-sac          | Macro          | G12S           | 0.033                  | 0.030          |                        |                | Wildtype |              |
| C_35    | OMA15     | OMA       | Ovary (R)           | Macro          | G12C           | 0.0019                 | 0*             |                        |                | Wildtype |              |
| C_35    | OMA15     | OMA       | Ovary (R)           | Macro          | G12D           | 0.022                  | 0.013          |                        |                | Wildtype |              |
| C_35    | OMA15     | OMA       | Ovary (R)           | Macro          | G12R           | 0*                     | 0*             |                        |                | Wildtype |              |
| C_35    | OMA15     | OMA       | Ovary (R)           | Macro          | G12V           | 0.018                  | 0.051          | 0.0016                 | 0.49           | Mutant   | G12V         |
| C_35    | OMA15     | OMA       | Ovary (R)           | Macro          | G12A           | 0.0016                 | 0.0033         | 0.0061                 | 0*             | Wildtype |              |
| C_35    | OMA15     | OMA       | Ovary (R)           | Macro          | G12S           | 0.025                  | 0.053          | 1.0                    | 0.38           | Wildtype |              |
| C_35    | SUP14     | SUP       | Pelvic sidewall (L) | Macro          | G12C           | 0.0041                 | 0*             |                        |                | Wildtype |              |
| C_35    | SUP14     | SUP       | Pelvic sidewall (L) | Macro          | G12D           | 0.018                  | 0.035          | 0.73                   | 0.39           | Wildtype |              |
| C_35    | SUP14     | SUP       | Pelvic sidewall (L) | Macro          | G12R           | 0.0014                 | 0*             |                        |                | Wildtype |              |

| Case ID | Sample ID | Endo type | Anatomical Location | Enrich. method | Variant tested | Multi. cut-off VAF (%) | Multi. VAF (%) | Indiv. cut-off VAF (%) | Indiv. VAF (%) | Result   | KRAS Variant |
|---------|-----------|-----------|---------------------|----------------|----------------|------------------------|----------------|------------------------|----------------|----------|--------------|
| C_35    | SUP14     | SUP       | Pelvic sidewall (L) | Macro          | G12V           | 0-0007                 | 0-10           | 0-0060                 | 1-7            | Mutant   | G12V         |
| C_35    | SUP14     | SUP       | Pelvic sidewall (L) | Macro          | G12A           | 0*                     | 0*             |                        |                | Wildtype |              |
| C_35    | SUP14     | SUP       | Pelvic sidewall (L) | Macro          | G12S           | 0-033                  | 0-011          |                        |                | Wildtype |              |
| C_35    | SUP92     | SUP       | Uterosacral (L)     | Macro          | G12C           | 0-0058                 | 0*             |                        |                | Wildtype |              |
| C_35    | SUP92     | SUP       | Uterosacral (L)     | Macro          | G12D           | 0-084                  | 0-037          |                        |                | Wildtype |              |
| C_35    | SUP92     | SUP       | Uterosacral (L)     | Macro          | G12R           | 0*                     | 0*             |                        |                | Wildtype |              |
| C_35    | SUP92     | SUP       | Uterosacral (L)     | Macro          | G12V           | 0-0036                 | 1-3            | 0-0053                 | 11             | Mutant   | G12V         |
| C_35    | SUP92     | SUP       | Uterosacral (L)     | Macro          | G12A           | 0-0022                 | 0-011          | 0-0015                 | 0-025          | Mutant   | G12A         |
| C_35    | SUP92     | SUP       | Uterosacral (L)     | Macro          | G12S           | 0-046                  | 0-039          |                        |                | Wildtype |              |
| C_36    | SUP15     | SUP       | Pelvic sidewall (L) | Macro          | G12C           | 0-0041                 | 0-0028         |                        |                | Wildtype |              |
| C_36    | SUP15     | SUP       | Pelvic sidewall (L) | Macro          | G12D           | 0-018                  | 0-033          | 0-73                   | 0-33           | Wildtype |              |
| C_36    | SUP15     | SUP       | Pelvic sidewall (L) | Macro          | G12R           | 0-0014                 | 0*             |                        |                | Wildtype |              |
| C_36    | SUP15     | SUP       | Pelvic sidewall (L) | Macro          | G12V           | 0-0007                 | 0-011          | 0-0060                 | 0-014          | Mutant   | G12V         |
| C_36    | SUP15     | SUP       | Pelvic sidewall (L) | Macro          | G12A           | 0*                     | 0*             |                        |                | Wildtype |              |
| C_36    | SUP15     | SUP       | Pelvic sidewall (L) | Macro          | G12S           | 0-033                  | 0-039          | 0-44                   | 0-47           | Mutant   | G12S         |
| C_36    | SUP93     | SUP       | Cul-de-sac (R)      | Macro          | G12C           | 0-0058                 | 0*             |                        |                | Wildtype |              |
| C_36    | SUP93     | SUP       | Cul-de-sac (R)      | Macro          | G12D           | 0-084                  | 0-053          |                        |                | Wildtype |              |
| C_36    | SUP93     | SUP       | Cul-de-sac (R)      | Macro          | G12R           | 0*                     | 0*             |                        |                | Wildtype |              |
| C_36    | SUP93     | SUP       | Cul-de-sac (R)      | Macro          | G12V           | 0-0036                 | 0-0023         |                        |                | Wildtype |              |
| C_36    | SUP93     | SUP       | Cul-de-sac (R)      | Macro          | G12A           | 0-0022                 | 0*             |                        |                | Wildtype |              |
| C_36    | SUP93     | SUP       | Cul-de-sac (R)      | Macro          | G12S           | 0-046                  | 0-030          |                        |                | Wildtype |              |
| C_37    | DIE86     | DIE       | Uterosacral (L)     | LCM            | G12C           | 0-010                  | 0*             |                        |                | Wildtype |              |
| C_37    | DIE86     | DIE       | Uterosacral (L)     | LCM            | G12D           | 0-043                  | 0*             |                        |                | Wildtype |              |
| C_37    | DIE86     | DIE       | Uterosacral (L)     | LCM            | G12R           | 0-0016                 | 0*             |                        |                | Wildtype |              |
| C_37    | DIE86     | DIE       | Uterosacral (L)     | LCM            | G12V           | 0-010                  | 0-0018         |                        |                | Wildtype |              |
| C_37    | DIE86     | DIE       | Uterosacral (L)     | LCM            | G12A           | 0-0046                 | 0*             |                        |                | Wildtype |              |
| C_37    | DIE86     | DIE       | Uterosacral (L)     | LCM            | G12S           | 0-085                  | 0-0035         |                        |                | Wildtype |              |
| C_37    | DIE87     | DIE       | Uterosacral (R)     | Macro          | G12C           | 0-010                  | 0*             |                        |                | Wildtype |              |

| Case ID | Sample ID | Endo type | Anatomical Location | Enrich. method | Variant tested | Multi. cut-off VAF (%) | Multi. VAF (%) | Indiv. cut-off VAF (%) | Indiv. VAF (%) | Result   | KRAS Variant |
|---------|-----------|-----------|---------------------|----------------|----------------|------------------------|----------------|------------------------|----------------|----------|--------------|
| C_37    | DIE87     | DIE       | Uterosacral (R)     | Macro          | G12D           | 0.043                  | 0.013          |                        |                | Wildtype |              |
| C_37    | DIE87     | DIE       | Uterosacral (R)     | Macro          | G12R           | 0.0016                 | 0*             |                        |                | Wildtype |              |
| C_37    | DIE87     | DIE       | Uterosacral (R)     | Macro          | G12V           | 0.010                  | 0*             |                        |                | Wildtype |              |
| C_37    | DIE87     | DIE       | Uterosacral (R)     | Macro          | G12A           | 0.0046                 | 0.0053         | 0.0044                 | 0.0077         | Mutant   | G12A         |
| C_37    | DIE87     | DIE       | Uterosacral (R)     | Macro          | G12S           | 0.085                  | 0.013          |                        |                | Wildtype |              |
| C_38    | SUP16     | SUP       | Pelvic sidewall (L) | Macro          | G12C           | 0.0041                 | 0.0062         | 0.025                  | 0.029          | Mutant   | G12C         |
| C_38    | SUP16     | SUP       | Pelvic sidewall (L) | Macro          | G12D           | 0.018                  | 0.031          | 0.73                   | 0.24           | Wildtype |              |
| C_38    | SUP16     | SUP       | Pelvic sidewall (L) | Macro          | G12R           | 0.0014                 | 0*             |                        |                | Wildtype |              |
| C_38    | SUP16     | SUP       | Pelvic sidewall (L) | Macro          | G12V           | 0.0007                 | 0*             | 0.0060                 | 0.0048         | Wildtype |              |
| C_38    | SUP16     | SUP       | Pelvic sidewall (L) | Macro          | G12A           | 0*                     | 0*             |                        |                | Wildtype |              |
| C_38    | SUP16     | SUP       | Pelvic sidewall (L) | Macro          | G12S           | 0.033                  | 0.093          | 0.44                   | 0.29           | Wildtype |              |
| C_39    | DIE1      | DIE       | Uterosacral (L)     | LCM            | G12C           | 0.017                  | 0*             |                        |                | Wildtype |              |
| C_39    | DIE1      | DIE       | Uterosacral (L)     | LCM            | G12D           | 0.13                   | 0.049          |                        |                | Wildtype |              |
| C_39    | DIE1      | DIE       | Uterosacral (L)     | LCM            | G12R           | 0*                     | 0*             |                        |                | Wildtype |              |
| C_39    | DIE1      | DIE       | Uterosacral (L)     | LCM            | G12V           | 0.013                  | 0.022          | 0.010                  | 0*             | Wildtype |              |
| C_39    | DIE1      | DIE       | Uterosacral (L)     | LCM            | G12A           | 0*                     | 0*             |                        |                | Wildtype |              |
| C_39    | DIE1      | DIE       | Uterosacral (L)     | LCM            | G12S           | 0.045                  | 0.14           | 0.67                   | 0.27           | Wildtype |              |
| C_39    | DIE2      | DIE       | Uterosacral (L)     | LCM            | G12C           | 0.0020                 | 0.010          | 0.55                   | 0.10           | Wildtype |              |
| C_39    | DIE2      | DIE       | Uterosacral (L)     | LCM            | G12D           | 0.0020                 | 0.015          | 0.77                   | 0.20           | Wildtype |              |
| C_39    | DIE2      | DIE       | Uterosacral (L)     | LCM            | G12R           | 0*                     | 0.0042         | 0.0020                 | 0*             | Wildtype |              |
| C_39    | DIE2      | DIE       | Uterosacral (L)     | LCM            | G12V           | 0.0060                 | 0.0042         |                        |                | Wildtype |              |
| C_39    | DIE2      | DIE       | Uterosacral (L)     | LCM            | G12A           | 0.0060                 | 0*             |                        |                | Wildtype |              |
| C_39    | DIE2      | DIE       | Uterosacral (L)     | LCM            | G12S           | 0.0020                 | 0*             |                        |                | Wildtype |              |
| C_39    | DIE3      | DIE       | Uterosacral (L)     | Macro          | G12C           | 0.0020                 | 0*             |                        |                | Wildtype |              |
| C_39    | DIE3      | DIE       | Uterosacral (L)     | Macro          | G12D           | 0.0020                 | 0*             | 0.77                   | 0.58           | Wildtype |              |
| C_39    | DIE3      | DIE       | Uterosacral (L)     | Macro          | G12R           | 0*                     | 0*             |                        |                | Wildtype |              |
| C_39    | DIE3      | DIE       | Uterosacral (L)     | Macro          | G12V           | 0.0060                 | 0.0015         |                        |                | Wildtype |              |
| C_39    | DIE3      | DIE       | Uterosacral (L)     | Macro          | G12A           | 0.0060                 | 0.0015         | 0.0015                 | 0.58           | Mutant   | G12A         |



| Case ID | Sample ID | Endo type | Anatomical Location   | Enrich. method | Variant tested | Multi. cut-off VAF (%) | Multi. VAF (%) | Indiv. cut-off VAF (%) | Indiv. VAF (%) | Result   | KRAS Variant |
|---------|-----------|-----------|-----------------------|----------------|----------------|------------------------|----------------|------------------------|----------------|----------|--------------|
| C_39    | DIE3      | DIE       | Uterosacral (L)       | Macro          | G12S           | 0-0020                 | 0-0015         | 0-67                   | 0-33           | Wildtype |              |
| C_39    | SUP17     | SUP       | Pelvic sidewall (R)   | Macro          | G12C           | 0-0019                 | 0-0021         | 0-039                  | 0-020          | Wildtype |              |
| C_39    | SUP17     | SUP       | Pelvic sidewall (R)   | Macro          | G12D           | 0-022                  | 0-0093         |                        |                | Wildtype |              |
| C_39    | SUP17     | SUP       | Pelvic sidewall (R)   | Macro          | G12R           | 0*                     | 0*             |                        |                | Wildtype |              |
| C_39    | SUP17     | SUP       | Pelvic sidewall (R)   | Macro          | G12V           | 0-018                  | 0*             |                        |                | Wildtype |              |
| C_39    | SUP17     | SUP       | Pelvic sidewall (R)   | Macro          | G12A           | 0-0016                 | 0*             |                        |                | Wildtype |              |
| C_39    | SUP17     | SUP       | Pelvic sidewall (R)   | Macro          | G12S           | 0-025                  | 0-0046         |                        |                | Wildtype |              |
| C_40    | DIE79     | DIE       | Cul-de-sac            | Macro          | G12C           | 0-0020                 | 0-0018         |                        |                | Wildtype |              |
| C_40    | DIE79     | DIE       | Cul-de-sac            | Macro          | G12D           | 0-0020                 | 0-0035         | 0-77                   | 0-26           | Wildtype |              |
| C_40    | DIE79     | DIE       | Cul-de-sac            | Macro          | G12R           | 0*                     | 0*             |                        |                | Wildtype |              |
| C_40    | DIE79     | DIE       | Cul-de-sac            | Macro          | G12V           | 0-0060                 | 0-0018         |                        |                | Wildtype |              |
| C_40    | DIE79     | DIE       | Cul-de-sac            | Macro          | G12A           | 0-0060                 | 0*             |                        |                | Wildtype |              |
| C_40    | DIE79     | DIE       | Cul-de-sac            | Macro          | G12S           | 0-0020                 | 0-0035         | 0-73                   | 0-30           | Wildtype |              |
| C_41    | OMA1      | OMA       | Ovary (NS)            | Macro          | G12C           | 0-010                  | 0*             |                        |                | Wildtype |              |
| C_41    | OMA1      | OMA       | Ovary (NS)            | Macro          | G12D           | 0-043                  | 0-041          |                        |                | Wildtype |              |
| C_41    | OMA1      | OMA       | Ovary (NS)            | Macro          | G12R           | 0-0016                 | 0*             |                        |                | Wildtype |              |
| C_41    | OMA1      | OMA       | Ovary (NS)            | Macro          | G12V           | 0-010                  | 0-0094         |                        |                | Wildtype |              |
| C_41    | OMA1      | OMA       | Ovary (NS)            | Macro          | G12A           | 0-0046                 | 0-20           | 0-0033                 | 1-2            | Mutant   | G12A         |
| C_41    | OMA1      | OMA       | Ovary (NS)            | Macro          | G12S           | 0-085                  | 0-044          | 1-2                    | 0-25           | Wildtype |              |
| C_42    | DIE102    | DIE       | Rectosigmoid junction | LCM            | G12C           | 0-010                  | 0*             |                        |                | Wildtype |              |
| C_42    | DIE102    | DIE       | Rectosigmoid junction | LCM            | G12D           | 0-043                  | 0-0016         |                        |                | Wildtype |              |
| C_42    | DIE102    | DIE       | Rectosigmoid junction | LCM            | G12R           | 0-0016                 | 0*             |                        |                | Wildtype |              |
| C_42    | DIE102    | DIE       | Rectosigmoid junction | LCM            | G12V           | 0-010                  | 0*             |                        |                | Wildtype |              |
| C_42    | DIE102    | DIE       | Rectosigmoid junction | LCM            | G12A           | 0-0046                 | 0-0016         |                        |                | Wildtype |              |
| C_42    | DIE102    | DIE       | Rectosigmoid junction | LCM            | G12S           | 0-085                  | 0*             |                        |                | Wildtype |              |
| C_43    | SUP18     | SUP       | Cul-de-sac (R)        | Macro          | G12C           | 0-0019                 | 0*             |                        |                | Wildtype |              |
| C_43    | SUP18     | SUP       | Cul-de-sac (R)        | Macro          | G12D           | 0-022                  | 0-0021         |                        |                | Wildtype |              |

| Case ID | Sample ID | Endo type | Anatomical Location | Enrich. method | Variant tested | Multi. cut-off VAF (%) | Multi. VAF (%) | Indiv. cut-off VAF (%) | Indiv. VAF (%) | Result   | KRAS Variant |
|---------|-----------|-----------|---------------------|----------------|----------------|------------------------|----------------|------------------------|----------------|----------|--------------|
| C_43    | SUP18     | SUP       | Cul-de-sac (R)      | Macro          | G12R           | 0*                     | 0*             |                        |                | Wildtype |              |
| C_43    | SUP18     | SUP       | Cul-de-sac (R)      | Macro          | G12V           | 0-018                  | 0-013          |                        |                | Wildtype |              |
| C_43    | SUP18     | SUP       | Cul-de-sac (R)      | Macro          | G12A           | 0-0016                 | 0-0021         | 0-0061                 | 0-0015         | Wildtype |              |
| C_43    | SUP18     | SUP       | Cul-de-sac (R)      | Macro          | G12S           | 0-025                  | 0*             |                        |                | Wildtype |              |
| C_43    | SUP94     | SUP       | Cul-de-sac (L)      | Macro          | G12C           | 0*                     | 0*             |                        |                | Wildtype |              |
| C_43    | SUP94     | SUP       | Cul-de-sac (L)      | Macro          | G12D           | 0-043                  | 0*             |                        |                | Wildtype |              |
| C_43    | SUP94     | SUP       | Cul-de-sac (L)      | Macro          | G12R           | 0*                     | 0*             |                        |                | Wildtype |              |
| C_43    | SUP94     | SUP       | Cul-de-sac (L)      | Macro          | G12V           | 0-0020                 | 0*             |                        |                | Wildtype |              |
| C_43    | SUP94     | SUP       | Cul-de-sac (L)      | Macro          | G12A           | 0*                     | 0*             |                        |                | Wildtype |              |
| C_43    | SUP94     | SUP       | Cul-de-sac (L)      | Macro          | G12S           | 0-031                  | 0*             |                        |                | Wildtype |              |
| C_44    | SUP19     | SUP       | Cul-de-sac          | Macro          | G12C           | 0-0019                 | 0-0024         | 0-039                  | 0-0016         | Wildtype |              |
| C_44    | SUP19     | SUP       | Cul-de-sac          | Macro          | G12D           | 0-022                  | 0-0071         |                        |                | Wildtype |              |
| C_44    | SUP19     | SUP       | Cul-de-sac          | Macro          | G12R           | 0*                     | 0*             |                        |                | Wildtype |              |
| C_44    | SUP19     | SUP       | Cul-de-sac          | Macro          | G12V           | 0-018                  | 0-0070         |                        |                | Wildtype |              |
| C_44    | SUP19     | SUP       | Cul-de-sac          | Macro          | G12A           | 0-0016                 | 0*             |                        |                | Wildtype |              |
| C_44    | SUP19     | SUP       | Cul-de-sac          | Macro          | G12S           | 0-025                  | 0-012          |                        |                | Wildtype |              |
| C_45    | SUP20     | SUP       | Uterosacral (R)     | Macro          | G12C           | 0*                     | 0*             |                        |                | Wildtype |              |
| C_45    | SUP20     | SUP       | Uterosacral (R)     | Macro          | G12D           | 0-019                  | 0-044          | 0-99                   | 0-42           | Wildtype |              |
| C_45    | SUP20     | SUP       | Uterosacral (R)     | Macro          | G12R           | 0*                     | 0*             |                        |                | Wildtype |              |
| C_45    | SUP20     | SUP       | Uterosacral (R)     | Macro          | G12V           | 0-0016                 | 0-0044         | 0-017                  | 0-0046         | Wildtype |              |
| C_45    | SUP20     | SUP       | Uterosacral (R)     | Macro          | G12A           | 0-0016                 | 0*             |                        |                | Wildtype |              |
| C_45    | SUP20     | SUP       | Uterosacral (R)     | Macro          | G12S           | 0-030                  | 0-044          | 1-0                    | 0-41           | Wildtype |              |
| C_45    | SUP95     | SUP       | Cul-de-sac (L)      | Macro          | G12C           | 0-0058                 | 0-42           | 0-072                  | 8-4            | Mutant   | G12C         |
| C_45    | SUP95     | SUP       | Cul-de-sac (L)      | Macro          | G12D           | 0-084                  | 0-15           | 0-98                   | 0-23           | Wildtype |              |
| C_45    | SUP95     | SUP       | Cul-de-sac (L)      | Macro          | G12R           | 0*                     | 0-015          | 0-0020                 | 0-010          | Mutant   | G12R         |
| C_45    | SUP95     | SUP       | Cul-de-sac (L)      | Macro          | G12V           | 0-0036                 | 0-0097         | 0-0053                 | 0-0012         | Wildtype |              |
| C_45    | SUP95     | SUP       | Cul-de-sac (L)      | Macro          | G12A           | 0-0022                 | 0*             |                        |                | Wildtype |              |
| C_45    | SUP95     | SUP       | Cul-de-sac (L)      | Macro          | G12S           | 0-046                  | 0-0096         |                        |                | Wildtype |              |

| Case ID | Sample ID | Endo type | Anatomical Location | Enrich. method | Variant tested | Multi. cut-off VAF (%) | Multi. VAF (%) | Indiv. cut-off VAF (%) | Indiv. VAF (%) | Result   | KRAS Variant |
|---------|-----------|-----------|---------------------|----------------|----------------|------------------------|----------------|------------------------|----------------|----------|--------------|
| C_46    | OMA17     | OMA       | Ovary (L)           | Macro          | G12C           | 0-012                  | 0-037          | 0-036                  | 0*             | Wildtype |              |
| C_46    | OMA17     | OMA       | Ovary (L)           | Macro          | G12D           | 0-017                  | 0-036          | 0-71                   | 0-31           | Wildtype |              |
| C_46    | OMA17     | OMA       | Ovary (L)           | Macro          | G12R           | 0*                     | 0*             |                        |                | Wildtype |              |
| C_46    | OMA17     | OMA       | Ovary (L)           | Macro          | G12V           | 0-0097                 | 0*             |                        |                | Wildtype |              |
| C_46    | OMA17     | OMA       | Ovary (L)           | Macro          | G12A           | 0*                     | 0*             |                        |                | Wildtype |              |
| C_46    | OMA17     | OMA       | Ovary (L)           | Macro          | G12S           | 0-038                  | 0-088          | 0-75                   | 0-24           | Wildtype |              |
| C_47    | SUP21     | SUP       | Cul-de-sac (R)      | Macro          | G12C           | 0-0041                 | 0-019          | 0-025                  | 0-0060         | Wildtype |              |
| C_47    | SUP21     | SUP       | Cul-de-sac (R)      | Macro          | G12D           | 0-018                  | 0-096          | 0-73                   | 0-29           | Wildtype |              |
| C_47    | SUP21     | SUP       | Cul-de-sac (R)      | Macro          | G12R           | 0-0014                 | 0*             |                        |                | Wildtype |              |
| C_47    | SUP21     | SUP       | Cul-de-sac (R)      | Macro          | G12V           | 0-0007                 | 0*             |                        |                | Wildtype |              |
| C_47    | SUP21     | SUP       | Cul-de-sac (R)      | Macro          | G12A           | 0*                     | 0-0064         | 0*                     | 0*             | Wildtype |              |
| C_47    | SUP21     | SUP       | Cul-de-sac (R)      | Macro          | G12S           | 0-033                  | 0-14           | 0-44                   | 0-46           | Mutant   | G12S         |
| C_47    | SUP96     | SUP       | Cul-de-sac (L)      | Macro          | G12C           | 0-0058                 | 0-0029         |                        |                | Wildtype |              |
| C_47    | SUP96     | SUP       | Cul-de-sac (L)      | Macro          | G12D           | 0-084                  | 0-015          |                        |                | Wildtype |              |
| C_47    | SUP96     | SUP       | Cul-de-sac (L)      | Macro          | G12R           | 0*                     | 0*             |                        |                | Wildtype |              |
| C_47    | SUP96     | SUP       | Cul-de-sac (L)      | Macro          | G12V           | 0-0036                 | 0-40           | 0-0053                 | 2-2            | Mutant   | G12V         |
| C_47    | SUP96     | SUP       | Cul-de-sac (L)      | Macro          | G12A           | 0-0022                 | 0-0030         | 0-0015                 | 0-0028         | Mutant   | G12A         |
| C_47    | SUP96     | SUP       | Cul-de-sac (L)      | Macro          | G12S           | 0-046                  | 0-044          |                        |                | Wildtype |              |
| C_48    | DIE97     | DIE       | Uterosacral (L)     | LCM            | G12C           | 0-010                  | 0*             |                        |                | Wildtype |              |
| C_48    | DIE97     | DIE       | Uterosacral (L)     | LCM            | G12D           | 0-043                  | 0-047          | 0-74                   | 0-31           | Wildtype |              |
| C_48    | DIE97     | DIE       | Uterosacral (L)     | LCM            | G12R           | 0-0016                 | 0*             |                        |                | Wildtype |              |
| C_48    | DIE97     | DIE       | Uterosacral (L)     | LCM            | G12V           | 0-010                  | 0-0030         |                        |                | Wildtype |              |
| C_48    | DIE97     | DIE       | Uterosacral (L)     | LCM            | G12A           | 0-0046                 | 0*             |                        |                | Wildtype |              |
| C_48    | DIE97     | DIE       | Uterosacral (L)     | LCM            | G12S           | 0-085                  | 0-045          |                        |                | Wildtype |              |
| C_48    | DIE98     | DIE       | Uterosacral (L)     | LCM            | G12C           | 0-010                  | 0*             |                        |                | Wildtype |              |
| C_48    | DIE98     | DIE       | Uterosacral (L)     | LCM            | G12D           | 0-043                  | 0-015          |                        |                | Wildtype |              |
| C_48    | DIE98     | DIE       | Uterosacral (L)     | LCM            | G12R           | 0-0016                 | 0*             |                        |                | Wildtype |              |
| C_48    | DIE98     | DIE       | Uterosacral (L)     | LCM            | G12V           | 0-010                  | 0-0088         |                        |                | Wildtype |              |

| Case ID | Sample ID | Endo type | Anatomical Location | Enrich. method | Variant tested | Multi. cut-off VAF (%) | Multi. VAF (%) | Indiv. cut-off VAF (%) | Indiv. VAF (%) | Result   | KRAS Variant |
|---------|-----------|-----------|---------------------|----------------|----------------|------------------------|----------------|------------------------|----------------|----------|--------------|
| C_48    | DIE98     | DIE       | Uterosacral (L)     | LCM            | G12A           | 0-0046                 | 0-0029         |                        |                | Wildtype |              |
| C_48    | DIE98     | DIE       | Uterosacral (L)     | LCM            | G12S           | 0-085                  | 0-020          |                        |                | Wildtype |              |
| C_48    | OMA18     | OMA       | Ovary (R)           | Macro          | G12C           | 0-012                  | 0-040          | 0-036                  | 0-018          | Wildtype |              |
| C_48    | OMA18     | OMA       | Ovary (R)           | Macro          | G12D           | 0-017                  | 0-048          | 0-71                   | 0-29           | Wildtype |              |
| C_48    | OMA18     | OMA       | Ovary (R)           | Macro          | G12R           | 0*                     | 0*             |                        |                | Wildtype |              |
| C_48    | OMA18     | OMA       | Ovary (R)           | Macro          | G12V           | 0-0097                 | 0-0044         | 0-0060                 | 0-0038         | Wildtype |              |
| C_48    | OMA18     | OMA       | Ovary (R)           | Macro          | G12A           | 0*                     | 0*             |                        |                | Wildtype |              |
| C_48    | OMA18     | OMA       | Ovary (R)           | Macro          | G12S           | 0-038                  | 0-013          |                        |                | Wildtype |              |
| C_48    | SUP48     | SUP       | Fallopian tube      | Macro          | G12C           | 0*                     | 0*             |                        |                | Wildtype |              |
| C_48    | SUP48     | SUP       | Fallopian tube      | Macro          | G12D           | 0-027                  | 0-021          |                        |                | Wildtype |              |
| C_48    | SUP48     | SUP       | Fallopian tube      | Macro          | G12R           | 0*                     | 0*             |                        |                | Wildtype |              |
| C_48    | SUP48     | SUP       | Fallopian tube      | Macro          | G12V           | 0*                     | 0-032          | 0-0065                 | 0-21           | Mutant   | G12V         |
| C_48    | SUP48     | SUP       | Fallopian tube      | Macro          | G12A           | 0-0021                 | 0*             |                        |                | Wildtype |              |
| C_48    | SUP48     | SUP       | Fallopian tube      | Macro          | G12S           | 0-021                  | 0-016          |                        |                | Wildtype |              |
| C_49    | DIE59     | DIE       | Cul-de-sac          | Macro          | G12C           | 0-24                   | 0-018          |                        |                | Wildtype |              |
| C_49    | DIE59     | DIE       | Cul-de-sac          | Macro          | G12D           | 0-24                   | 0-018          |                        |                | Wildtype |              |
| C_49    | DIE59     | DIE       | Cul-de-sac          | Macro          | G12R           | 0-0048                 | 0*             |                        |                | Wildtype |              |
| C_49    | DIE59     | DIE       | Cul-de-sac          | Macro          | G12V           | 0-0060                 | 0-0044         |                        |                | Wildtype |              |
| C_49    | DIE59     | DIE       | Cul-de-sac          | Macro          | G12A           | 0*                     | 0*             |                        |                | Wildtype |              |
| C_49    | DIE59     | DIE       | Cul-de-sac          | Macro          | G12S           | 0-23                   | 0-027          |                        |                | Wildtype |              |
| C_50    | OMA16     | OMA       | Ovary (L)           | Macro          | G12C           | 0-0019                 | 0-0074         | 0-039                  | 0-011          | Wildtype |              |
| C_50    | OMA16     | OMA       | Ovary (L)           | Macro          | G12D           | 0-022                  | 0-073          | 0-64                   | 0-74           | Mutant   | G12D         |
| C_50    | OMA16     | OMA       | Ovary (L)           | Macro          | G12R           | 0*                     | 0*             |                        |                | Wildtype |              |
| C_50    | OMA16     | OMA       | Ovary (L)           | Macro          | G12V           | 0-018                  | 0-037          | 0-0016                 | 0-077          | Mutant   | G12V         |
| C_50    | OMA16     | OMA       | Ovary (L)           | Macro          | G12A           | 0-0016                 | 0-0037         | 0-0061                 | 0*             | Wildtype |              |
| C_50    | OMA16     | OMA       | Ovary (L)           | Macro          | G12S           | 0-025                  | 0-0073         |                        |                | Wildtype |              |
| C_51    | DIE28     | DIE       | Cul-de-sac          | Macro          | G12C           | 0-0020                 | 0-068          | 0-55                   | 0-34           | Wildtype |              |
| C_51    | DIE28     | DIE       | Cul-de-sac          | Macro          | G12D           | 0-0020                 | 0-13           | 0-77                   | 0-36           | Wildtype |              |

| Case ID | Sample ID | Endo type | Anatomical Location | Enrich. method | Variant tested | Multi. cut-off VAF (%) | Multi. VAF (%) | Indiv. cut-off VAF (%) | Indiv. VAF (%) | Result   | KRAS Variant |
|---------|-----------|-----------|---------------------|----------------|----------------|------------------------|----------------|------------------------|----------------|----------|--------------|
| C_51    | DIE28     | DIE       | Cul-de-sac          | Macro          | G12R           | 0*                     | 0*             |                        |                | Wildtype |              |
| C_51    | DIE28     | DIE       | Cul-de-sac          | Macro          | G12V           | 0-0060                 | 0-015          | 0-010                  | 0*             | Wildtype |              |
| C_51    | DIE28     | DIE       | Cul-de-sac          | Macro          | G12A           | 0-0060                 | 0*             |                        |                | Wildtype |              |
| C_51    | DIE28     | DIE       | Cul-de-sac          | Macro          | G12S           | 0-0020                 | 0-13           | 0-67                   | 0-40           | Wildtype |              |
| C_51    | OMA4      | OMA       | Ovary (R)           | Macro          | G12C           | 0*                     | 0*             |                        |                | Wildtype |              |
| C_51    | OMA4      | OMA       | Ovary (R)           | Macro          | G12D           | 0-027                  | 0-014          |                        |                | Wildtype |              |
| C_51    | OMA4      | OMA       | Ovary (R)           | Macro          | G12R           | 0*                     | 0*             |                        |                | Wildtype |              |
| C_51    | OMA4      | OMA       | Ovary (R)           | Macro          | G12V           | 0*                     | 0*             |                        |                | Wildtype |              |
| C_51    | OMA4      | OMA       | Ovary (R)           | Macro          | G12A           | 0-0021                 | 0*             |                        |                | Wildtype |              |
| C_51    | OMA4      | OMA       | Ovary (R)           | Macro          | G12S           | 0-021                  | 0-011          |                        |                | Wildtype |              |
| C_52    | SUP76     | SUP       | Fallopian tube (R)  | Macro          | G12C           | 0*                     | 0*             |                        |                | Wildtype |              |
| C_52    | SUP76     | SUP       | Fallopian tube (R)  | Macro          | G12D           | 0-043                  | 0*             |                        |                | Wildtype |              |
| C_52    | SUP76     | SUP       | Fallopian tube (R)  | Macro          | G12R           | 0*                     | 0*             |                        |                | Wildtype |              |
| C_52    | SUP76     | SUP       | Fallopian tube (R)  | Macro          | G12V           | 0-0020                 | 0*             |                        |                | Wildtype |              |
| C_52    | SUP76     | SUP       | Fallopian tube (R)  | Macro          | G12A           | 0*                     | 0*             |                        |                | Wildtype |              |
| C_52    | SUP76     | SUP       | Fallopian tube (R)  | Macro          | G12S           | 0-031                  | 0*             |                        |                | Wildtype |              |
| C_53    | SUP22     | SUP       | Fallopian tube (B)  | Macro          | G12C           | 0*                     | 0*             |                        |                | Wildtype |              |
| C_53    | SUP22     | SUP       | Fallopian tube (B)  | Macro          | G12D           | 0-019                  | 0-026          | 0-99                   | 0-84           | Wildtype |              |
| C_53    | SUP22     | SUP       | Fallopian tube (B)  | Macro          | G12R           | 0*                     | 0*             |                        |                | Wildtype |              |
| C_53    | SUP22     | SUP       | Fallopian tube (B)  | Macro          | G12V           | 0-0016                 | 0*             |                        |                | Wildtype |              |
| C_53    | SUP22     | SUP       | Fallopian tube (B)  | Macro          | G12A           | 0-0016                 | 0-0029         | 0-0044                 | 0-0017         | Wildtype |              |
| C_53    | SUP22     | SUP       | Fallopian tube (B)  | Macro          | G12S           | 0-030                  | 0-0088         |                        |                | Wildtype |              |
| C_54    | SUP23     | SUP       | Cul-de-sac          | Macro          | G12C           | 0*                     | 0*             |                        |                | Wildtype |              |
| C_54    | SUP23     | SUP       | Cul-de-sac          | Macro          | G12D           | 0-019                  | 0-028          | 0-99                   | 0-30           | Wildtype |              |
| C_54    | SUP23     | SUP       | Cul-de-sac          | Macro          | G12R           | 0*                     | 0*             |                        |                | Wildtype |              |
| C_54    | SUP23     | SUP       | Cul-de-sac          | Macro          | G12V           | 0-0016                 | 0-0046         | 0-017                  | 0-0040         | Wildtype |              |
| C_54    | SUP23     | SUP       | Cul-de-sac          | Macro          | G12A           | 0-0016                 | 0*             |                        |                | Wildtype |              |
| C_54    | SUP23     | SUP       | Cul-de-sac          | Macro          | G12S           | 0-030                  | 0-019          |                        |                | Wildtype |              |

| Case ID | Sample ID | Endo type | Anatomical Location   | Enrich. method | Variant tested | Multi. cut-off VAF (%) | Multi. VAF (%) | Indiv. cut-off VAF (%) | Indiv. VAF (%) | Result   | KRAS Variant |
|---------|-----------|-----------|-----------------------|----------------|----------------|------------------------|----------------|------------------------|----------------|----------|--------------|
| C_55    | DIE22     | DIE       | Rectosigmoid junction | Macro          | G12C           | 0-0020                 | 0*             |                        |                | Wildtype |              |
| C_55    | DIE22     | DIE       | Rectosigmoid junction | Macro          | G12D           | 0-0020                 | 0*             |                        |                | Wildtype |              |
| C_55    | DIE22     | DIE       | Rectosigmoid junction | Macro          | G12R           | 0*                     | 0*             |                        |                | Wildtype |              |
| C_55    | DIE22     | DIE       | Rectosigmoid junction | Macro          | G12V           | 0-0060                 | 0*             |                        |                | Wildtype |              |
| C_55    | DIE22     | DIE       | Rectosigmoid junction | Macro          | G12A           | 0-0060                 | 0*             |                        |                | Wildtype |              |
| C_55    | DIE22     | DIE       | Rectosigmoid junction | Macro          | G12S           | 0-0020                 | 0*             |                        |                | Wildtype |              |
| C_55    | DIE23     | DIE       | Appendix              | Macro          | G12C           | 0-0020                 | 0*             |                        |                | Wildtype |              |
| C_55    | DIE23     | DIE       | Appendix              | Macro          | G12D           | 0-0020                 | 0-0033         | 0-77                   | 0-19           | Wildtype |              |
| C_55    | DIE23     | DIE       | Appendix              | Macro          | G12R           | 0*                     | 0*             |                        |                | Wildtype |              |
| C_55    | DIE23     | DIE       | Appendix              | Macro          | G12V           | 0-0060                 | 0*             |                        |                | Wildtype |              |
| C_55    | DIE23     | DIE       | Appendix              | Macro          | G12A           | 0-0060                 | 0*             |                        |                | Wildtype |              |
| C_55    | DIE23     | DIE       | Appendix              | Macro          | G12S           | 0-0020                 | 0-0033         | 0-67                   | 0-36           | Wildtype |              |
| C_55    | DIE24     | DIE       | Uterus                | LCM            | G12C           | 0-010                  | 0*             |                        |                | Wildtype |              |
| C_55    | DIE24     | DIE       | Uterus                | LCM            | G12D           | 0-043                  | 0-0089         |                        |                | Wildtype |              |
| C_55    | DIE24     | DIE       | Uterus                | LCM            | G12R           | 0-0016                 | 0*             |                        |                | Wildtype |              |
| C_55    | DIE24     | DIE       | Uterus                | LCM            | G12V           | 0-010                  | 0-0022         |                        |                | Wildtype |              |
| C_55    | DIE24     | DIE       | Uterus                | LCM            | G12A           | 0-0046                 | 0*             |                        |                | Wildtype |              |
| C_55    | DIE24     | DIE       | Uterus                | LCM            | G12S           | 0-085                  | 0-016          |                        |                | Wildtype |              |
| C_55    | DIE25     | DIE       | Uterus                | Macro          | G12C           | 0-24                   | 0-0087         |                        |                | Wildtype |              |
| C_55    | DIE25     | DIE       | Uterus                | Macro          | G12D           | 0-24                   | 0-0087         |                        |                | Wildtype |              |
| C_55    | DIE25     | DIE       | Uterus                | Macro          | G12R           | 0-0048                 | 0*             |                        |                | Wildtype |              |
| C_55    | DIE25     | DIE       | Uterus                | Macro          | G12V           | 0-0060                 | 0-0052         |                        |                | Wildtype |              |
| C_55    | DIE25     | DIE       | Uterus                | Macro          | G12A           | 0*                     | 0*             |                        |                | Wildtype |              |
| C_55    | DIE25     | DIE       | Uterus                | Macro          | G12S           | 0-23                   | 0-0017         |                        |                | Wildtype |              |
| C_55    | DIE26     | DIE       | Uterosacral (B)       | LCM            | G12C           | 0-010                  | 0*             |                        |                | Wildtype |              |
| C_55    | DIE26     | DIE       | Uterosacral (B)       | LCM            | G12D           | 0-043                  | 0-0027         |                        |                | Wildtype |              |
| C_55    | DIE26     | DIE       | Uterosacral (B)       | LCM            | G12R           | 0-0016                 | 0*             |                        |                | Wildtype |              |

| Case ID | Sample ID | Endo type | Anatomical Location | Enrich. method | Variant tested | Multi. cut-off VAF (%) | Multi. VAF (%) | Indiv. cut-off VAF (%) | Indiv. VAF (%) | Result   | KRAS Variant |
|---------|-----------|-----------|---------------------|----------------|----------------|------------------------|----------------|------------------------|----------------|----------|--------------|
| C_55    | DIE26     | DIE       | Uterosacral (B)     | LCM            | G12V           | 0-010                  | 0-017          | 0-11                   | 0-068          | Wildtype |              |
| C_55    | DIE26     | DIE       | Uterosacral (B)     | LCM            | G12A           | 0-0046                 | 0*             |                        |                | Wildtype |              |
| C_55    | DIE26     | DIE       | Uterosacral (B)     | LCM            | G12S           | 0-085                  | 0-0082         |                        |                | Wildtype |              |
| C_56    | OMA5      | OMA       | Ovary (L)           | Macro          | G12C           | 0*                     | 0*             |                        |                | Wildtype |              |
| C_56    | OMA5      | OMA       | Ovary (L)           | Macro          | G12D           | 0-027                  | 0-013          |                        |                | Wildtype |              |
| C_56    | OMA5      | OMA       | Ovary (L)           | Macro          | G12R           | 0*                     | 0*             |                        |                | Wildtype |              |
| C_56    | OMA5      | OMA       | Ovary (L)           | Macro          | G12V           | 0*                     | 0*             |                        |                | Wildtype |              |
| C_56    | OMA5      | OMA       | Ovary (L)           | Macro          | G12A           | 0-0021                 | 0*             |                        |                | Wildtype |              |
| C_56    | OMA5      | OMA       | Ovary (L)           | Macro          | G12S           | 0-021                  | 0-021          | 0-44                   | 0-41           | Wildtype |              |
| C_56    | SUP24     | SUP       | Uterosacral (R)     | Macro          | G12C           | 0*                     | 0*             |                        |                | Wildtype |              |
| C_56    | SUP24     | SUP       | Uterosacral (R)     | Macro          | G12D           | 0-019                  | 0-0021         | 0-99                   | 0-32           | Wildtype |              |
| C_56    | SUP24     | SUP       | Uterosacral (R)     | Macro          | G12R           | 0*                     | 0*             |                        |                | Wildtype |              |
| C_56    | SUP24     | SUP       | Uterosacral (R)     | Macro          | G12V           | 0-0016                 | 0-015          | 0-017                  | 0-31           | Mutant   | G12V         |
| C_56    | SUP24     | SUP       | Uterosacral (R)     | Macro          | G12A           | 0-0016                 | 0*             |                        |                | Wildtype |              |
| C_56    | SUP24     | SUP       | Uterosacral (R)     | Macro          | G12S           | 0-030                  | 0-0062         |                        |                | Wildtype |              |
| C_56    | SUP97     | SUP       | Uterosacral (L)     | Macro          | G12C           | 0*                     | 0*             |                        |                | Wildtype |              |
| C_56    | SUP97     | SUP       | Uterosacral (L)     | Macro          | G12D           | 0-043                  | 0-024          | 1-5                    | 0-32           | Wildtype |              |
| C_56    | SUP97     | SUP       | Uterosacral (L)     | Macro          | G12R           | 0*                     | 0*             |                        |                | Wildtype |              |
| C_56    | SUP97     | SUP       | Uterosacral (L)     | Macro          | G12V           | 0-0020                 | 0-0069         | 0-0039                 | 0*             | Wildtype |              |
| C_56    | SUP97     | SUP       | Uterosacral (L)     | Macro          | G12A           | 0*                     | 0*             |                        |                | Wildtype |              |
| C_56    | SUP97     | SUP       | Uterosacral (L)     | Macro          | G12S           | 0-031                  | 0-036          | 0-78                   | 0-41           | Wildtype |              |
| C_57    | DIE16     | DIE       | Uterosacral (L)     | LCM            | G12C           | 0-010                  | 0-0096         |                        |                | Wildtype |              |
| C_57    | DIE16     | DIE       | Uterosacral (L)     | LCM            | G12D           | 0-043                  | 0-038          |                        |                | Wildtype |              |
| C_57    | DIE16     | DIE       | Uterosacral (L)     | LCM            | G12R           | 0-0016                 | 0*             |                        |                | Wildtype |              |
| C_57    | DIE16     | DIE       | Uterosacral (L)     | LCM            | G12V           | 0-010                  | 0-014          | 0-010                  | 0-029          | Mutant   | G12V         |
| C_57    | DIE16     | DIE       | Uterosacral (L)     | LCM            | G12A           | 0-0046                 | 0*             |                        |                | Wildtype |              |
| C_57    | DIE16     | DIE       | Uterosacral (L)     | LCM            | G12S           | 0-085                  | 0-057          |                        |                | Wildtype |              |
| C_57    | DIE17     | DIE       | Uterosacral (R)     | Macro          | G12C           | 0-017                  | 0*             |                        |                | Wildtype |              |

| Case ID | Sample ID | Endo type | Anatomical Location | Enrich. method | Variant tested | Multi. cut-off VAF (%) | Multi. VAF (%) | Indiv. cut-off VAF (%) | Indiv. VAF (%) | Result   | KRAS Variant |
|---------|-----------|-----------|---------------------|----------------|----------------|------------------------|----------------|------------------------|----------------|----------|--------------|
| C_57    | DIE17     | DIE       | Uterosacral (R)     | Macro          | G12D           | 0.13                   | 0.042          | 0.77                   | 0.28           | Wildtype |              |
| C_57    | DIE17     | DIE       | Uterosacral (R)     | Macro          | G12R           | 0*                     | 0*             |                        |                | Wildtype |              |
| C_57    | DIE17     | DIE       | Uterosacral (R)     | Macro          | G12V           | 0.0060                 | 0*             |                        |                | Wildtype |              |
| C_57    | DIE17     | DIE       | Uterosacral (R)     | Macro          | G12A           | 0*                     | 0*             |                        |                | Wildtype |              |
| C_57    | DIE17     | DIE       | Uterosacral (R)     | Macro          | G12S           | 0.045                  | 0.34           | 0.67                   | 0.33           | Wildtype |              |
| C_57    | DIE18     | DIE       | Cul-de-sac          | Macro          | G12C           | 0.238                  | 0.200          |                        |                | Wildtype |              |
| C_57    | DIE18     | DIE       | Cul-de-sac          | Macro          | G12D           | 0.24                   | 0.26           | 0.35                   | 0.48           | Mutant   | G12D         |
| C_57    | DIE18     | DIE       | Cul-de-sac          | Macro          | G12R           | 0.0048                 | 0*             |                        |                | Wildtype |              |
| C_57    | DIE18     | DIE       | Cul-de-sac          | Macro          | G12V           | 0.0060                 | 0*             |                        |                | Wildtype |              |
| C_57    | DIE18     | DIE       | Cul-de-sac          | Macro          | G12A           | 0*                     | 0*             |                        |                | Wildtype |              |
| C_57    | DIE18     | DIE       | Cul-de-sac          | Macro          | G12S           | 0.23                   | 0.037          |                        |                | Wildtype |              |
| C_57    | DIE19     | DIE       | Vagina              | LCM            | G12C           | 0.010                  | 0*             |                        |                | Wildtype |              |
| C_57    | DIE19     | DIE       | Vagina              | LCM            | G12D           | 0.043                  | 0.014          |                        |                | Wildtype |              |
| C_57    | DIE19     | DIE       | Vagina              | LCM            | G12R           | 0.0016                 | 0*             |                        |                | Wildtype |              |
| C_57    | DIE19     | DIE       | Vagina              | LCM            | G12V           | 0.010                  | 0*             |                        |                | Wildtype |              |
| C_57    | DIE19     | DIE       | Vagina              | LCM            | G12A           | 0.0046                 | 0*             |                        |                | Wildtype |              |
| C_57    | DIE19     | DIE       | Vagina              | LCM            | G12S           | 0.085                  | 0.036          |                        |                | Wildtype |              |
| C_57    | DIE20     | DIE       | Cul-de-sac          | Macro          | G12C           | 0.24                   | 0.0032         |                        |                | Wildtype |              |
| C_57    | DIE20     | DIE       | Cul-de-sac          | Macro          | G12D           | 0.24                   | 0.0032         |                        |                | Wildtype |              |
| C_57    | DIE20     | DIE       | Cul-de-sac          | Macro          | G12R           | 0.0048                 | 0*             |                        |                | Wildtype |              |
| C_57    | DIE20     | DIE       | Cul-de-sac          | Macro          | G12V           | 0.0060                 | 0.0032         |                        |                | Wildtype |              |
| C_57    | DIE20     | DIE       | Cul-de-sac          | Macro          | G12A           | 0*                     | 0*             |                        |                | Wildtype |              |
| C_57    | DIE20     | DIE       | Cul-de-sac          | Macro          | G12S           | 0.23                   | 0.0095         |                        |                | Wildtype |              |
| C_58    | DIE103    | DIE       | Cul-de-sac          | LCM            | G12C           | 0.010                  | 0*             |                        |                | Wildtype |              |
| C_58    | DIE103    | DIE       | Cul-de-sac          | LCM            | G12D           | 0.043                  | 0.49           | 0.74                   | 0.85           | Mutant   | G12D         |
| C_58    | DIE103    | DIE       | Cul-de-sac          | LCM            | G12R           | 0.0016                 | 0*             |                        |                | Wildtype |              |
| C_58    | DIE103    | DIE       | Cul-de-sac          | LCM            | G12V           | 0.010                  | 0*             |                        |                | Wildtype |              |
| C_58    | DIE103    | DIE       | Cul-de-sac          | LCM            | G12A           | 0.0046                 | 0*             |                        |                | Wildtype |              |



| Case ID | Sample ID | Endo type | Anatomical Location | Enrich. method | Variant tested | Multi. cut-off VAF (%) | Multi. VAF (%) | Indiv. cut-off VAF (%) | Indiv. VAF (%) | Result   | KRAS Variant |
|---------|-----------|-----------|---------------------|----------------|----------------|------------------------|----------------|------------------------|----------------|----------|--------------|
| C_58    | DIE103    | DIE       | Cul-de-sac          | LCM            | G12S           | 0.085                  | 0.023          |                        |                | Wildtype |              |
| C_59    | DIE89     | DIE       | Uterosacral (R)     | LCM            | G12C           | 0.010                  | 0*             | 0.030                  | 0*             | Wildtype |              |
| C_59    | DIE89     | DIE       | Uterosacral (R)     | LCM            | G12D           | 0.043                  | 0*             | 1.0                    | 0.14           | Wildtype |              |
| C_59    | DIE89     | DIE       | Uterosacral (R)     | LCM            | G12R           | 0.0016                 | 0*             | 0.020                  | 0*             | Wildtype |              |
| C_59    | DIE89     | DIE       | Uterosacral (R)     | LCM            | G12V           | 0.010                  | 0*             | 0.010                  | 0*             | Wildtype |              |
| C_59    | DIE89     | DIE       | Uterosacral (R)     | LCM            | G12A           | 0.0046                 | 0*             | 0.0049                 | 0*             | Wildtype |              |
| C_59    | DIE89     | DIE       | Uterosacral (R)     | LCM            | G12S           | 0.0084                 | 0.73           | 0.53                   | 1.3            | Mutant   | G12S         |
| C_59    | DIE90     | DIE       | Uterosacral (R)     | LCM            | G12C           | 0.010                  | 0*             |                        |                | Wildtype |              |
| C_59    | DIE90     | DIE       | Uterosacral (R)     | LCM            | G12D           | 0.043                  | 0.17           | 0.74                   | 0.34           | Wildtype |              |
| C_59    | DIE90     | DIE       | Uterosacral (R)     | LCM            | G12R           | 0.0016                 | 0*             |                        |                | Wildtype |              |
| C_59    | DIE90     | DIE       | Uterosacral (R)     | LCM            | G12V           | 0.010                  | 0.020          | 0.010                  | 0*             | Wildtype |              |
| C_59    | DIE90     | DIE       | Uterosacral (R)     | LCM            | G12A           | 0.0046                 | 0.0098         | 0.0029                 | 0*             | Wildtype |              |
| C_59    | DIE90     | DIE       | Uterosacral (R)     | LCM            | G12S           | 0.085                  | 0.17           | 1.2                    | 0.46           | Wildtype |              |
| C_59    | DIE91     | DIE       | Uterosacral (L)     | Macro          | G12C           | 0.010                  | 0.0055         |                        |                | Wildtype |              |
| C_59    | DIE91     | DIE       | Uterosacral (L)     | Macro          | G12D           | 0.043                  | 0.033          |                        |                | Wildtype |              |
| C_59    | DIE91     | DIE       | Uterosacral (L)     | Macro          | G12R           | 0.0016                 | 0*             |                        |                | Wildtype |              |
| C_59    | DIE91     | DIE       | Uterosacral (L)     | Macro          | G12V           | 0.010                  | 0.017          | 0.010                  | 0.15           | Mutant   | G12V         |
| C_59    | DIE91     | DIE       | Uterosacral (L)     | Macro          | G12A           | 0.0046                 | 1.6            | 0.0033                 | 4.6            | Mutant   | G12A         |
| C_59    | DIE91     | DIE       | Uterosacral (L)     | Macro          | G12S           | 0.085                  | 0.24           | 1.2                    | 0.38           | Wildtype |              |
| C_59    | OMA31     | OMA       | Ovary (R)           | Macro          | G12C           | 0*                     | 0*             |                        |                | Wildtype |              |
| C_59    | OMA31     | OMA       | Ovary (R)           | Macro          | G12D           | 0.043                  | 0.0019         |                        |                | Wildtype |              |
| C_59    | OMA31     | OMA       | Ovary (R)           | Macro          | G12R           | 0*                     | 0*             |                        |                | Wildtype |              |
| C_59    | OMA31     | OMA       | Ovary (R)           | Macro          | G12V           | 0.0020                 | 0.0038         | 0.0039                 | 0*             | Wildtype |              |
| C_59    | OMA31     | OMA       | Ovary (R)           | Macro          | G12A           | 0*                     | 0*             |                        |                | Wildtype |              |
| C_59    | OMA31     | OMA       | Ovary (R)           | Macro          | G12S           | 0.031                  | 0.012          |                        |                | Wildtype |              |
| C_60    | SUP25     | SUP       | Uterus (P)          | Macro          | G12C           | 0*                     | 0*             |                        |                | Wildtype |              |
| C_60    | SUP25     | SUP       | Uterus (P)          | Macro          | G12D           | 0.019                  | 0.026          | 0.99                   | 0.35           | Wildtype |              |
| C_60    | SUP25     | SUP       | Uterus (P)          | Macro          | G12R           | 0*                     | 0*             |                        |                | Wildtype |              |

| Case ID | Sample ID | Endo type | Anatomical Location | Enrich. method | Variant tested | Multi. cut-off VAF (%) | Multi. VAF (%) | Indiv. cut-off VAF (%) | Indiv. VAF (%) | Result   | KRAS Variant |
|---------|-----------|-----------|---------------------|----------------|----------------|------------------------|----------------|------------------------|----------------|----------|--------------|
| C_60    | SUP25     | SUP       | Uterus (P)          | Macro          | G12V           | 0-0016                 | 0*             |                        |                | Wildtype |              |
| C_60    | SUP25     | SUP       | Uterus (P)          | Macro          | G12A           | 0-0016                 | 0-0028         | 0-0044                 | 0-0031         | Wildtype |              |
| C_60    | SUP25     | SUP       | Uterus (P)          | Macro          | G12S           | 0-030                  | 0-051          | 1-0                    | 0-30           | Wildtype |              |
| C_61    | SUP26     | SUP       | Cul-de-sac          | Macro          | G12C           | 0*                     | 0*             |                        |                | Wildtype |              |
| C_61    | SUP26     | SUP       | Cul-de-sac          | Macro          | G12D           | 0-019                  | 0*             |                        |                | Wildtype |              |
| C_61    | SUP26     | SUP       | Cul-de-sac          | Macro          | G12R           | 0*                     | 0*             |                        |                | Wildtype |              |
| C_61    | SUP26     | SUP       | Cul-de-sac          | Macro          | G12V           | 0-0016                 | 0*             |                        |                | Wildtype |              |
| C_61    | SUP26     | SUP       | Cul-de-sac          | Macro          | G12A           | 0-0016                 | 0*             |                        |                | Wildtype |              |
| C_61    | SUP26     | SUP       | Cul-de-sac          | Macro          | G12S           | 0-030                  | 0-067          | 1-0                    | 0-34           | Wildtype |              |
| C_62    | DIE50     | DIE       | Uterosacral (R)     | Macro          | G12C           | 0-24                   | 0-14           |                        |                | Wildtype |              |
| C_62    | DIE50     | DIE       | Uterosacral (R)     | Macro          | G12D           | 0-24                   | 0-13           | 0-35                   | 0-70           | Mutant   | G12D         |
| C_62    | DIE50     | DIE       | Uterosacral (R)     | Macro          | G12R           | 0-0048                 | 0*             |                        |                | Wildtype |              |
| C_62    | DIE50     | DIE       | Uterosacral (R)     | Macro          | G12V           | 0-0060                 | 0-010          | 0-010                  | 0*             | Wildtype |              |
| C_62    | DIE50     | DIE       | Uterosacral (R)     | Macro          | G12A           | 0*                     | 0-0050         | 0-0049                 | 0*             | Wildtype |              |
| C_62    | DIE50     | DIE       | Uterosacral (R)     | Macro          | G12S           | 0-23                   | 0-14           | 0-67                   | 0-43           | Wildtype |              |
| C_62    | SUP27     | SUP       | Cul-de-sac          | Macro          | G12C           | 0*                     | 0*             |                        |                | Wildtype |              |
| C_62    | SUP27     | SUP       | Cul-de-sac          | Macro          | G12D           | 0-019                  | 0-049          | 0-99                   | 0-76           | Wildtype |              |
| C_62    | SUP27     | SUP       | Cul-de-sac          | Macro          | G12R           | 0*                     | 0*             |                        |                | Wildtype |              |
| C_62    | SUP27     | SUP       | Cul-de-sac          | Macro          | G12V           | 0-0016                 | 0-0065         | 0-017                  | 0-0033         | Wildtype |              |
| C_62    | SUP27     | SUP       | Cul-de-sac          | Macro          | G12A           | 0-0016                 | 0*             |                        |                | Wildtype |              |
| C_62    | SUP27     | SUP       | Cul-de-sac          | Macro          | G12S           | 0-030                  | 0-042          | 1-0                    | 0-31           | Wildtype |              |
| C_62    | SUP98     | SUP       | Uterosacral (L)     | Macro          | G12C           | 0-0058                 | 0*             |                        |                | Wildtype |              |
| C_62    | SUP98     | SUP       | Uterosacral (L)     | Macro          | G12D           | 0-084                  | 0*             |                        |                | Wildtype |              |
| C_62    | SUP98     | SUP       | Uterosacral (L)     | Macro          | G12R           | 0*                     | 0*             |                        |                | Wildtype |              |
| C_62    | SUP98     | SUP       | Uterosacral (L)     | Macro          | G12V           | 0-0036                 | 0*             |                        |                | Wildtype |              |
| C_62    | SUP98     | SUP       | Uterosacral (L)     | Macro          | G12A           | 0-0022                 | 0*             |                        |                | Wildtype |              |
| C_62    | SUP98     | SUP       | Uterosacral (L)     | Macro          | G12S           | 0-046                  | 0*             |                        |                | Wildtype |              |
| C_63    | OMA19     | OMA       | Ovary (NS)          | Macro          | G12C           | 0-012                  | 0-018          | 0-036                  | 0*             | Wildtype |              |

| Case ID | Sample ID | Endo type | Anatomical Location | Enrich. method | Variant tested | Multi. cut-off VAF (%) | Multi. VAF (%) | Indiv. cut-off VAF (%) | Indiv. VAF (%) | Result   | KRAS Variant |
|---------|-----------|-----------|---------------------|----------------|----------------|------------------------|----------------|------------------------|----------------|----------|--------------|
| C_63    | OMA19     | OMA       | Ovary (NS)          | Macro          | G12D           | 0-017                  | 0-018          | 0-71                   | 0-23           | Wildtype |              |
| C_63    | OMA19     | OMA       | Ovary (NS)          | Macro          | G12R           | 0*                     | 0*             |                        |                | Wildtype |              |
| C_63    | OMA19     | OMA       | Ovary (NS)          | Macro          | G12V           | 0-0097                 | 0-052          | 0*                     | 0-36           | Mutant   | G12V         |
| C_63    | OMA19     | OMA       | Ovary (NS)          | Macro          | G12A           | 0*                     | 0*             |                        |                | Wildtype |              |
| C_63    | OMA19     | OMA       | Ovary (NS)          | Macro          | G12S           | 0-038                  | 0-038          | 0-75                   | 0-34           | Wildtype |              |
| C_64    | DIE60     | DIE       | Uterosacral (L)     | Macro          | G12C           | 0-24                   | 0-0020         |                        |                | Wildtype |              |
| C_64    | DIE60     | DIE       | Uterosacral (L)     | Macro          | G12D           | 0-24                   | 0-0020         |                        |                | Wildtype |              |
| C_64    | DIE60     | DIE       | Uterosacral (L)     | Macro          | G12R           | 0-0048                 | 0*             |                        |                | Wildtype |              |
| C_64    | DIE60     | DIE       | Uterosacral (L)     | Macro          | G12V           | 0-0060                 | 0-096          | 0-019                  | 1-4            | Mutant   | G12V         |
| C_64    | DIE60     | DIE       | Uterosacral (L)     | Macro          | G12A           | 0*                     | 0*             |                        |                | Wildtype |              |
| C_64    | DIE60     | DIE       | Uterosacral (L)     | Macro          | G12S           | 0-23                   | 0-016          |                        |                | Wildtype |              |
| C_64    | DIE61     | DIE       | Uterosacral (R)     | LCM            | G12C           | 0-010                  | 0*             |                        |                | Wildtype |              |
| C_64    | DIE61     | DIE       | Uterosacral (R)     | LCM            | G12D           | 0-043                  | 0-14           | 0-74                   | 0-30           | Wildtype |              |
| C_64    | DIE61     | DIE       | Uterosacral (R)     | LCM            | G12R           | 0-0016                 | 0*             |                        |                | Wildtype |              |
| C_64    | DIE61     | DIE       | Uterosacral (R)     | LCM            | G12V           | 0-010                  | 0*             |                        |                | Wildtype |              |
| C_64    | DIE61     | DIE       | Uterosacral (R)     | LCM            | G12A           | 0-0046                 | 0*             |                        |                | Wildtype |              |
| C_64    | DIE61     | DIE       | Uterosacral (R)     | LCM            | G12S           | 0-085                  | 0-018          |                        |                | Wildtype |              |
| C_65    | DIE92     | DIE       | Uterosacral (L)     | LCM            | G12C           | 0-010                  | 0*             |                        |                | Wildtype |              |
| C_65    | DIE92     | DIE       | Uterosacral (L)     | LCM            | G12D           | 0-043                  | 0-0035         |                        |                | Wildtype |              |
| C_65    | DIE92     | DIE       | Uterosacral (L)     | LCM            | G12R           | 0-0016                 | 0-0069         | 0-020                  | 0-084          | Mutant   | G12R         |
| C_65    | DIE92     | DIE       | Uterosacral (L)     | LCM            | G12V           | 0-010                  | 0-003          |                        |                | Wildtype |              |
| C_65    | DIE92     | DIE       | Uterosacral (L)     | LCM            | G12A           | 0-0046                 | 0*             |                        |                | Wildtype |              |
| C_65    | DIE92     | DIE       | Uterosacral (L)     | LCM            | G12S           | 0-085                  | 0-024          |                        |                | Wildtype |              |
| C_66    | DIE21     | DIE       | Appendix            | Macro          | G12C           | 0-0020                 | 0-0067         | 0-55                   | 0-12           | Wildtype |              |
| C_66    | DIE21     | DIE       | Appendix            | Macro          | G12D           | 0-0020                 | 0-022          | 0-77                   | 0-93           | Mutant   | G12D         |
| C_66    | DIE21     | DIE       | Appendix            | Macro          | G12R           | 0*                     | 0*             |                        |                | Wildtype |              |
| C_66    | DIE21     | DIE       | Appendix            | Macro          | G12V           | 0-0060                 | 0-054          | 0-27                   | 1-4            | Mutant   | G12V         |
| C_66    | DIE21     | DIE       | Appendix            | Macro          | G12A           | 0-0060                 | 0*             |                        |                | Wildtype |              |

| Case ID | Sample ID | Endo type | Anatomical Location | Enrich. method | Variant tested | Multi. cut-off VAF (%) | Multi. VAF (%) | Indiv. cut-off VAF (%) | Indiv. VAF (%) | Result   | KRAS Variant |
|---------|-----------|-----------|---------------------|----------------|----------------|------------------------|----------------|------------------------|----------------|----------|--------------|
| C_66    | DIE21     | DIE       | Appendix            | Macro          | G12S           | 0-0020                 | 0-020          | 0-67                   | 0-36           | Wildtype |              |
| C_66    | OMA32     | OMA       | Ovary (B)           | Macro          | G12C           | 0-0058                 | 0*             |                        |                | Wildtype |              |
| C_66    | OMA32     | OMA       | Ovary (B)           | Macro          | G12D           | 0-084                  | 0-019          |                        |                | Wildtype |              |
| C_66    | OMA32     | OMA       | Ovary (B)           | Macro          | G12R           | 0*                     | 0*             |                        |                | Wildtype |              |
| C_66    | OMA32     | OMA       | Ovary (B)           | Macro          | G12V           | 0-0036                 | 0-0019         |                        |                | Wildtype |              |
| C_66    | OMA32     | OMA       | Ovary (B)           | Macro          | G12A           | 0-0022                 | 0*             |                        |                | Wildtype |              |
| C_66    | OMA32     | OMA       | Ovary (B)           | Macro          | G12S           | 0-046                  | 0-028          |                        |                | Wildtype |              |
| C_67    | OMA20     | OMA       | Ovary (L)           | Macro          | G12C           | 0-012                  | 0-022          | 0-036                  | 0-0023         | Wildtype |              |
| C_67    | OMA20     | OMA       | Ovary (L)           | Macro          | G12D           | 0-017                  | 0-027          | 0-71                   | 0-31           | Wildtype |              |
| C_67    | OMA20     | OMA       | Ovary (L)           | Macro          | G12R           | 0*                     | 0*             |                        |                | Wildtype |              |
| C_67    | OMA20     | OMA       | Ovary (L)           | Macro          | G12V           | 0-010                  | 0*             |                        |                | Wildtype |              |
| C_67    | OMA20     | OMA       | Ovary (L)           | Macro          | G12A           | 0*                     | 0*             |                        |                | Wildtype |              |
| C_67    | OMA20     | OMA       | Ovary (L)           | Macro          | G12S           | 0-038                  | 0-0056         |                        |                | Wildtype |              |
| C_67    | OMA43     | OMA       | Ovary (R)           | Macro          | G12C           | 0-0058                 | 0*             |                        |                | Wildtype |              |
| C_67    | OMA43     | OMA       | Ovary (R)           | Macro          | G12D           | 0-084                  | 0-036          |                        |                | Wildtype |              |
| C_67    | OMA43     | OMA       | Ovary (R)           | Macro          | G12R           | 0*                     | 0*             |                        |                | Wildtype |              |
| C_67    | OMA43     | OMA       | Ovary (R)           | Macro          | G12V           | 0-0036                 | 0-0045         | 0-0053                 | 0*             | Wildtype |              |
| C_67    | OMA43     | OMA       | Ovary (R)           | Macro          | G12A           | 0-0022                 | 0*             |                        |                | Wildtype |              |
| C_67    | OMA43     | OMA       | Ovary (R)           | Macro          | G12S           | 0-046                  | 0-011          |                        |                | Wildtype |              |
| C_68    | SUP28     | SUP       | Uterosacral (R)     | Macro          | G12C           | 0*                     | 0*             |                        |                | Wildtype |              |
| C_68    | SUP28     | SUP       | Uterosacral (R)     | Macro          | G12D           | 0-019                  | 0-013          |                        |                | Wildtype |              |
| C_68    | SUP28     | SUP       | Uterosacral (R)     | Macro          | G12R           | 0*                     | 0*             |                        |                | Wildtype |              |
| C_68    | SUP28     | SUP       | Uterosacral (R)     | Macro          | G12V           | 0-0016                 | 0-0084         | 0-017                  | 0*             | Wildtype |              |
| C_68    | SUP28     | SUP       | Uterosacral (R)     | Macro          | G12A           | 0-0016                 | 0-0042         | 0-0044                 | 0*             | Wildtype |              |
| C_68    | SUP28     | SUP       | Uterosacral (R)     | Macro          | G12S           | 0-030                  | 0-013          |                        |                | Wildtype |              |
| C_68    | SUP99     | SUP       | Uterosacral (L)     | Macro          | G12C           | 0-0058                 | 0*             |                        |                | Wildtype |              |
| C_68    | SUP99     | SUP       | Uterosacral (L)     | Macro          | G12D           | 0-084                  | 0-067          | 0-98                   | 0-53           | Wildtype |              |
| C_68    | SUP99     | SUP       | Uterosacral (L)     | Macro          | G12R           | 0*                     | 0*             |                        |                | Wildtype |              |

| Case ID | Sample ID | Endo type | Anatomical Location | Enrich. method | Variant tested | Multi. cut-off VAF (%) | Multi. VAF (%) | Indiv. cut-off VAF (%) | Indiv. VAF (%) | Result   | KRAS Variant |
|---------|-----------|-----------|---------------------|----------------|----------------|------------------------|----------------|------------------------|----------------|----------|--------------|
| C_68    | SUP99     | SUP       | Uterosacral (L)     | Macro          | G12V           | 0-0036                 | 0*             |                        |                | Wildtype |              |
| C_68    | SUP99     | SUP       | Uterosacral (L)     | Macro          | G12A           | 0-0022                 | 0*             |                        |                | Wildtype |              |
| C_68    | SUP99     | SUP       | Uterosacral (L)     | Macro          | G12S           | 0-046                  | 0-019          |                        |                | Wildtype |              |
| C_69    | SUP29     | SUP       | Fallopian tube (B)  | Macro          | G12C           | 0*                     | 0*             |                        |                | Wildtype |              |
| C_69    | SUP29     | SUP       | Fallopian tube (B)  | Macro          | G12D           | 0-019                  | 0-036          | 0-99                   | 0-25           | Wildtype |              |
| C_69    | SUP29     | SUP       | Fallopian tube (B)  | Macro          | G12R           | 0*                     | 0*             |                        |                | Wildtype |              |
| C_69    | SUP29     | SUP       | Fallopian tube (B)  | Macro          | G12V           | 0-0016                 | 0-0051         | 0-017                  | 0*             | Wildtype |              |
| C_69    | SUP29     | SUP       | Fallopian tube (B)  | Macro          | G12A           | 0-0016                 | 0-015          | 0-0044                 | 0*             | Wildtype |              |
| C_69    | SUP29     | SUP       | Fallopian tube (B)  | Macro          | G12S           | 0-030                  | 0-11           | 1-0                    | 0-63           | Wildtype |              |
| C_70    | DIE62     | DIE       | Uterosacral (R)     | Macro          | G12C           | 0-24                   | 0-0080         |                        |                | Wildtype |              |
| C_70    | DIE62     | DIE       | Uterosacral (R)     | Macro          | G12D           | 0-24                   | 0-0080         |                        |                | Wildtype |              |
| C_70    | DIE62     | DIE       | Uterosacral (R)     | Macro          | G12R           | 0-0048                 | 0*             |                        |                | Wildtype |              |
| C_70    | DIE62     | DIE       | Uterosacral (R)     | Macro          | G12V           | 0-0060                 | 0*             |                        |                | Wildtype |              |
| C_70    | DIE62     | DIE       | Uterosacral (R)     | Macro          | G12A           | 0*                     | 0*             |                        |                | Wildtype |              |
| C_70    | DIE62     | DIE       | Uterosacral (R)     | Macro          | G12S           | 0-23                   | 0-0040         |                        |                | Wildtype |              |
| C_70    | SUP100    | SUP       | Pelvic sidewall (L) | Macro          | G12C           | 0-0058                 | 0*             |                        |                | Wildtype |              |
| C_70    | SUP100    | SUP       | Pelvic sidewall (L) | Macro          | G12D           | 0-084                  | 0-058          | 0-98                   | 0-47           | Wildtype |              |
| C_70    | SUP100    | SUP       | Pelvic sidewall (L) | Macro          | G12R           | 0*                     | 0*             |                        |                | Wildtype |              |
| C_70    | SUP100    | SUP       | Pelvic sidewall (L) | Macro          | G12V           | 0-0036                 | 0-0025         |                        |                | Wildtype |              |
| C_70    | SUP100    | SUP       | Pelvic sidewall (L) | Macro          | G12A           | 0-0022                 | 0*             |                        |                | Wildtype |              |
| C_70    | SUP100    | SUP       | Pelvic sidewall (L) | Macro          | G12S           | 0-046                  | 0-020          |                        |                | Wildtype |              |
| C_70    | SUP30     | SUP       | Cul-de-sac (R)      | Macro          | G12C           | 0-0049                 | 0*             |                        |                | Wildtype |              |
| C_70    | SUP30     | SUP       | Cul-de-sac (R)      | Macro          | G12D           | 0-012                  | 0-32           | 0-62                   | 0-74           | Mutant   | G12D         |
| C_70    | SUP30     | SUP       | Cul-de-sac (R)      | Macro          | G12R           | 0-0020                 | 0*             |                        |                | Wildtype |              |
| C_70    | SUP30     | SUP       | Cul-de-sac (R)      | Macro          | G12V           | 0-0078                 | 0-0050         | 0-0097                 | 0*             | Wildtype |              |
| C_70    | SUP30     | SUP       | Cul-de-sac (R)      | Macro          | G12A           | 0-014                  | 0-0099         |                        |                | Wildtype |              |
| C_70    | SUP30     | SUP       | Cul-de-sac (R)      | Macro          | G12S           | 0-035                  | 0-046          | 1-2                    | 0-20           | Wildtype |              |
| C_71    | SUP31     | SUP       | Fallopian tube (L)  | Macro          | G12C           | 0*                     | 0*             |                        |                | Wildtype |              |

| Case ID | Sample ID | Endo type | Anatomical Location | Enrich. method | Variant tested | Multi. cut-off VAF (%) | Multi. VAF (%) | Indiv. cut-off VAF (%) | Indiv. VAF (%) | Result   | KRAS Variant |
|---------|-----------|-----------|---------------------|----------------|----------------|------------------------|----------------|------------------------|----------------|----------|--------------|
| C_71    | SUP31     | SUP       | Fallopian tube (L)  | Macro          | G12D           | 0.027                  | 0.054          | 0.73                   | 0.32           | Wildtype |              |
| C_71    | SUP31     | SUP       | Fallopian tube (L)  | Macro          | G12R           | 0*                     | 0*             |                        |                | Wildtype |              |
| C_71    | SUP31     | SUP       | Fallopian tube (L)  | Macro          | G12V           | 0*                     | 0.0043         | 0.0065                 | 0.0043         | Wildtype |              |
| C_71    | SUP31     | SUP       | Fallopian tube (L)  | Macro          | G12A           | 0.0021                 | 0*             |                        |                | Wildtype |              |
| C_71    | SUP31     | SUP       | Fallopian tube (L)  | Macro          | G12S           | 0.021                  | 0.046          | 1.2                    | 0.37           | Wildtype |              |
| C_72    | OMA21     | OMA       | Ovary (R)           | Macro          | G12C           | 0.0041                 | 0*             |                        |                | Wildtype |              |
| C_72    | OMA21     | OMA       | Ovary (R)           | Macro          | G12D           | 0.018                  | 0*             | 0.62                   | 0.22           | Wildtype |              |
| C_72    | OMA21     | OMA       | Ovary (R)           | Macro          | G12R           | 0.0014                 | 0*             |                        |                | Wildtype |              |
| C_72    | OMA21     | OMA       | Ovary (R)           | Macro          | G12V           | 0.00068                | 0.036          | 0.0060                 | 0.028          | Mutant   | G12V         |
| C_72    | OMA21     | OMA       | Ovary (R)           | Macro          | G12A           | 0*                     | 0*             |                        |                | Wildtype |              |
| C_72    | OMA21     | OMA       | Ovary (R)           | Macro          | G12S           | 0.033                  | 0.061          | 0.44                   | 0.13           | Wildtype |              |
| C_73    | SUP49     | SUP       | Pelvic sidewall (R) | Macro          | G12C           | 0*                     | 0*             |                        |                | Wildtype |              |
| C_73    | SUP49     | SUP       | Pelvic sidewall (R) | Macro          | G12D           | 0.027                  | 0.061          | 0.73                   | 1.2            | Mutant   | G12D         |
| C_73    | SUP49     | SUP       | Pelvic sidewall (R) | Macro          | G12R           | 0*                     | 0*             |                        |                | Wildtype |              |
| C_73    | SUP49     | SUP       | Pelvic sidewall (R) | Macro          | G12V           | 0*                     | 0.0079         | 0.0065                 | 0.0023         | Wildtype |              |
| C_73    | SUP49     | SUP       | Pelvic sidewall (R) | Macro          | G12A           | 0.0021                 | 0*             |                        |                | Wildtype |              |
| C_73    | SUP49     | SUP       | Pelvic sidewall (R) | Macro          | G12S           | 0.021                  | 0.0077         |                        |                | Wildtype |              |
| C_74    | DIE42     | DIE       | Periureteric (R)    | Macro          | G12C           | 0.24                   | 0.032          |                        |                | Wildtype |              |
| C_74    | DIE42     | DIE       | Periureteric (R)    | Macro          | G12D           | 0.24                   | 0.032          |                        |                | Wildtype |              |
| C_74    | DIE42     | DIE       | Periureteric (R)    | Macro          | G12R           | 0.0048                 | 0*             |                        |                | Wildtype |              |
| C_74    | DIE42     | DIE       | Periureteric (R)    | Macro          | G12V           | 0.0060                 | 0.21           | 0.019                  | 0.26           | Mutant   | G12V         |
| C_74    | DIE42     | DIE       | Periureteric (R)    | Macro          | G12A           | 0*                     | 0.016          | 0.0049                 | 0*             | Wildtype |              |
| C_74    | DIE42     | DIE       | Periureteric (R)    | Macro          | G12S           | 0.23                   | 0.25           | 0.67                   | 0.47           | Wildtype |              |
| C_74    | DIE43     | DIE       | Periureteric (R)    | Macro          | G12C           | 0.24                   | 0.010          |                        |                | Wildtype |              |
| C_74    | DIE43     | DIE       | Periureteric (R)    | Macro          | G12D           | 0.24                   | 0.010          |                        |                | Wildtype |              |
| C_74    | DIE43     | DIE       | Periureteric (R)    | Macro          | G12R           | 0.0048                 | 0*             |                        |                | Wildtype |              |
| C_74    | DIE43     | DIE       | Periureteric (R)    | Macro          | G12V           | 0.0060                 | 0*             |                        |                | Wildtype |              |
| C_74    | DIE43     | DIE       | Periureteric (R)    | Macro          | G12A           | 0*                     | 0*             |                        |                | Wildtype |              |

| Case ID | Sample ID | Endo type | Anatomical Location | Enrich. method | Variant tested | Multi. cut-off VAF (%) | Multi. VAF (%) | Indiv. cut-off VAF (%) | Indiv. VAF (%) | Result   | KRAS Variant |
|---------|-----------|-----------|---------------------|----------------|----------------|------------------------|----------------|------------------------|----------------|----------|--------------|
| C_74    | DIE43     | DIE       | Periureteric (R)    | Macro          | G12S           | 0.23                   | 0.015          |                        |                | Wildtype |              |
| C_75    | DIE44     | DIE       | Uterosacral (L)     | Macro          | G12C           | 0.24                   | 0.0043         |                        |                | Wildtype |              |
| C_75    | DIE44     | DIE       | Uterosacral (L)     | Macro          | G12D           | 0.24                   | 0.0043         |                        |                | Wildtype |              |
| C_75    | DIE44     | DIE       | Uterosacral (L)     | Macro          | G12R           | 0.0048                 | 0*             |                        |                | Wildtype |              |
| C_75    | DIE44     | DIE       | Uterosacral (L)     | Macro          | G12V           | 0.0060                 | 0.0022         |                        |                | Wildtype |              |
| C_75    | DIE44     | DIE       | Uterosacral (L)     | Macro          | G12A           | 0*                     | 0*             |                        |                | Wildtype |              |
| C_75    | DIE44     | DIE       | Uterosacral (L)     | Macro          | G12S           | 0.23                   | 0.011          |                        |                | Wildtype |              |
| C_75    | DIE45     | DIE       | Uterosacral (R)     | Macro          | G12C           | 0.24                   | 0.038          |                        |                | Wildtype |              |
| C_75    | DIE45     | DIE       | Uterosacral (R)     | Macro          | G12D           | 0.24                   | 0.038          | 0.35                   | 0.27           | Wildtype |              |
| C_75    | DIE45     | DIE       | Uterosacral (R)     | Macro          | G12R           | 0.0048                 | 0*             |                        |                | Wildtype |              |
| C_75    | DIE45     | DIE       | Uterosacral (R)     | Macro          | G12V           | 0.0060                 | 0*             |                        |                | Wildtype |              |
| C_75    | DIE45     | DIE       | Uterosacral (R)     | Macro          | G12A           | 0*                     | 0*             |                        |                | Wildtype |              |
| C_75    | DIE45     | DIE       | Uterosacral (R)     | Macro          | G12S           | 0.23                   | 0.024          | 0.67                   | 0.18           | Wildtype |              |
| C_75    | OMA22     | OMA       | Endometrium (L)     | Macro          | G12C           | 0.012                  | 0*             |                        |                | Wildtype |              |
| C_75    | OMA22     | OMA       | Endometrium (L)     | Macro          | G12D           | 0.017                  | 0*             |                        |                | Wildtype |              |
| C_75    | OMA22     | OMA       | Endometrium (L)     | Macro          | G12R           | 0*                     | 0*             |                        |                | Wildtype |              |
| C_75    | OMA22     | OMA       | Endometrium (L)     | Macro          | G12V           | 0.0097                 | 0*             |                        |                | Wildtype |              |
| C_75    | OMA22     | OMA       | Endometrium (L)     | Macro          | G12A           | 0*                     | 0*             |                        |                | Wildtype |              |
| C_75    | OMA22     | OMA       | Endometrium (L)     | Macro          | G12S           | 0.038                  | 0.038          | 0.75                   | 0.088          | Wildtype |              |
| C_75    | SUP32     | SUP       | Cul-de-sac          | Macro          | G12C           | 0.0049                 | 0*             |                        |                | Wildtype |              |
| C_75    | SUP32     | SUP       | Cul-de-sac          | Macro          | G12D           | 0.012                  | 0.021          | 0.62                   | 0.13           | Wildtype |              |
| C_75    | SUP32     | SUP       | Cul-de-sac          | Macro          | G12R           | 0.0020                 | 0*             |                        |                | Wildtype |              |
| C_75    | SUP32     | SUP       | Cul-de-sac          | Macro          | G12V           | 0.0078                 | 0.0035         | 0.0097                 | 0.0040         | Wildtype |              |
| C_75    | SUP32     | SUP       | Cul-de-sac          | Macro          | G12A           | 0.014                  | 0.025          | 0*                     | 0*             | Wildtype |              |
| C_75    | SUP32     | SUP       | Cul-de-sac          | Macro          | G12S           | 0.035                  | 0.053          | 1.2                    | 0.28           | Wildtype |              |
| C_76    | SUP33     | SUP       | Pelvic sidewall (L) | Macro          | G12C           | 0.0049                 | 0.040          | 0.025                  | 0.081          | Mutant   | G12C         |
| C_76    | SUP33     | SUP       | Pelvic sidewall (L) | Macro          | G12D           | 0.012                  | 0.22           | 0.62                   | 0.54           | Wildtype |              |
| C_76    | SUP33     | SUP       | Pelvic sidewall (L) | Macro          | G12R           | 0.0020                 | 0*             |                        |                | Wildtype |              |

| Case ID | Sample ID | Endo type | Anatomical Location | Enrich. method | Variant tested | Multi. cut-off VAF (%) | Multi. VAF (%) | Indiv. cut-off VAF (%) | Indiv. VAF (%) | Result   | KRAS Variant |
|---------|-----------|-----------|---------------------|----------------|----------------|------------------------|----------------|------------------------|----------------|----------|--------------|
| C_76    | SUP33     | SUP       | Pelvic sidewall (L) | Macro          | G12V           | 0.0078                 | 0*             |                        |                | Wildtype |              |
| C_76    | SUP33     | SUP       | Pelvic sidewall (L) | Macro          | G12A           | 0.014                  | 0.11           | 0*                     | 0*             | Wildtype |              |
| C_76    | SUP33     | SUP       | Pelvic sidewall (L) | Macro          | G12S           | 0.035                  | 0.24           | 1.2                    | 0.51           | Wildtype |              |
| C_77    | SUP50     | SUP       | Ovary (NS)          | Macro          | G12C           | 0*                     | 0*             |                        |                | Wildtype |              |
| C_77    | SUP50     | SUP       | Ovary (NS)          | Macro          | G12D           | 0.027                  | 0.0082         |                        |                | Wildtype |              |
| C_77    | SUP50     | SUP       | Ovary (NS)          | Macro          | G12R           | 0*                     | 0*             |                        |                | Wildtype |              |
| C_77    | SUP50     | SUP       | Ovary (NS)          | Macro          | G12V           | 0*                     | 0.0043         | 0.0065                 | 0.015          | Mutant   | G12V         |
| C_77    | SUP50     | SUP       | Ovary (NS)          | Macro          | G12A           | 0.0021                 | 0*             |                        |                | Wildtype |              |
| C_77    | SUP50     | SUP       | Ovary (NS)          | Macro          | G12S           | 0.021                  | 0.0021         |                        |                | Wildtype |              |
| C_78    | SUP51     | SUP       | Uterosacral (L)     | Macro          | G12C           | 0*                     | 0*             |                        |                | Wildtype |              |
| C_78    | SUP51     | SUP       | Uterosacral (L)     | Macro          | G12D           | 0.027                  | 0.0038         |                        |                | Wildtype |              |
| C_78    | SUP51     | SUP       | Uterosacral (L)     | Macro          | G12R           | 0*                     | 0*             |                        |                | Wildtype |              |
| C_78    | SUP51     | SUP       | Uterosacral (L)     | Macro          | G12V           | 0*                     | 0.0020         | 0.0065                 | 0.0045         | Wildtype |              |
| C_78    | SUP51     | SUP       | Uterosacral (L)     | Macro          | G12A           | 0.0021                 | 0.0019         |                        |                | Wildtype |              |
| C_78    | SUP51     | SUP       | Uterosacral (L)     | Macro          | G12S           | 0.021                  | 0.0020         |                        |                | Wildtype |              |
| C_78    | SUP101    | SUP       | Uterosacral (R)     | Macro          | G12C           | 0.0058                 | 0*             |                        |                | Wildtype |              |
| C_78    | SUP101    | SUP       | Uterosacral (R)     | Macro          | G12D           | 0.084                  | 0.040          |                        |                | Wildtype |              |
| C_78    | SUP101    | SUP       | Uterosacral (R)     | Macro          | G12R           | 0*                     | 0*             |                        |                | Wildtype |              |
| C_78    | SUP101    | SUP       | Uterosacral (R)     | Macro          | G12V           | 0.0036                 | 0*             |                        |                | Wildtype |              |
| C_78    | SUP101    | SUP       | Uterosacral (R)     | Macro          | G12A           | 0.0022                 | 0*             |                        |                | Wildtype |              |
| C_78    | SUP101    | SUP       | Uterosacral (R)     | Macro          | G12S           | 0.046                  | 0.0057         |                        |                | Wildtype |              |
| C_79    | DIE49     | DIE       | Cul-de-sac (A)      | Macro          | G12C           | 0.24                   | 0.057          |                        |                | Wildtype |              |
| C_79    | DIE49     | DIE       | Cul-de-sac (A)      | Macro          | G12D           | 0.24                   | 0.057          |                        |                | Wildtype |              |
| C_79    | DIE49     | DIE       | Cul-de-sac (A)      | Macro          | G12R           | 0.0048                 | 0*             |                        |                | Wildtype |              |
| C_79    | DIE49     | DIE       | Cul-de-sac (A)      | Macro          | G12V           | 0.0060                 | 0.019          | 0.019                  | 0.018          | Wildtype |              |
| C_79    | DIE49     | DIE       | Cul-de-sac (A)      | Macro          | G12A           | 0*                     | 0*             |                        |                | Wildtype |              |
| C_79    | DIE49     | DIE       | Cul-de-sac (A)      | Macro          | G12S           | 0.23                   | 0.038          |                        |                | Wildtype |              |
| C_79    | OMA23     | OMA       | Ovary (L)           | Macro          | G12C           | 0.012                  | 0.028          | 0.036                  | 0*             | Wildtype |              |



| Case ID | Sample ID | Endo type | Anatomical Location | Enrich. method | Variant tested | Multi. cut-off VAF (%) | Multi. VAF (%) | Indiv. cut-off VAF (%) | Indiv. VAF (%) | Result   | KRAS Variant |
|---------|-----------|-----------|---------------------|----------------|----------------|------------------------|----------------|------------------------|----------------|----------|--------------|
| C_79    | OMA23     | OMA       | Ovary (L)           | Macro          | G12D           | 0-017                  | 0-028          | 0-71                   | 0-19           | Wildtype |              |
| C_79    | OMA23     | OMA       | Ovary (L)           | Macro          | G12R           | 0*                     | 0*             |                        |                | Wildtype |              |
| C_79    | OMA23     | OMA       | Ovary (L)           | Macro          | G12V           | 0-0097                 | 0-0056         | 0*                     | 0*             | Wildtype |              |
| C_79    | OMA23     | OMA       | Ovary (L)           | Macro          | G12A           | 0*                     | 0*             |                        |                | Wildtype |              |
| C_79    | OMA23     | OMA       | Ovary (L)           | Macro          | G12S           | 0-038                  | 0-034          |                        |                | Wildtype |              |
| C_79    | SUP52     | SUP       | Cul-de-sac (A)      | Macro          | G12C           | 0*                     | 0*             |                        |                | Wildtype |              |
| C_79    | SUP52     | SUP       | Cul-de-sac (A)      | Macro          | G12D           | 0-027                  | 0-0039         |                        |                | Wildtype |              |
| C_79    | SUP52     | SUP       | Cul-de-sac (A)      | Macro          | G12R           | 0*                     | 0*             |                        |                | Wildtype |              |
| C_79    | SUP52     | SUP       | Cul-de-sac (A)      | Macro          | G12V           | 0*                     | 0-0020         | 0-0065                 | 0-0022         | Wildtype |              |
| C_79    | SUP52     | SUP       | Cul-de-sac (A)      | Macro          | G12A           | 0-0021                 | 0*             |                        |                | Wildtype |              |
| C_79    | SUP52     | SUP       | Cul-de-sac (A)      | Macro          | G12S           | 0-021                  | 0-016          |                        |                | Wildtype |              |
| C_80    | DIE29     | DIE       | Uterosacral (R)     | Macro          | G12C           | 0-24                   | 0-015          |                        |                | Wildtype |              |
| C_80    | DIE29     | DIE       | Uterosacral (R)     | Macro          | G12D           | 0-24                   | 0-015          |                        |                | Wildtype |              |
| C_80    | DIE29     | DIE       | Uterosacral (R)     | Macro          | G12R           | 0-0048                 | 0*             |                        |                | Wildtype |              |
| C_80    | DIE29     | DIE       | Uterosacral (R)     | Macro          | G12V           | 0-0060                 | 0-0050         | 0-019                  | 0-14           | Mutant   | G12V         |
| C_80    | DIE29     | DIE       | Uterosacral (R)     | Macro          | G12A           | 0*                     | 0*             |                        |                | Wildtype |              |
| C_80    | DIE29     | DIE       | Uterosacral (R)     | Macro          | G12S           | 0-23                   | 0-030          | 0-67                   | 0-53           | Wildtype |              |
| C_80    | DIE30     | DIE       | Pelvic sidewall (R) | Macro          | G12C           | 0-24                   | 0-0037         |                        |                | Wildtype |              |
| C_80    | DIE30     | DIE       | Pelvic sidewall (R) | Macro          | G12D           | 0-24                   | 0-0037         |                        |                | Wildtype |              |
| C_80    | DIE30     | DIE       | Pelvic sidewall (R) | Macro          | G12R           | 0-0048                 | 0*             |                        |                | Wildtype |              |
| C_80    | DIE30     | DIE       | Pelvic sidewall (R) | Macro          | G12V           | 0-0060                 | 0*             |                        |                | Wildtype |              |
| C_80    | DIE30     | DIE       | Pelvic sidewall (R) | Macro          | G12A           | 0*                     | 0*             |                        |                | Wildtype |              |
| C_80    | DIE30     | DIE       | Pelvic sidewall (R) | Macro          | G12S           | 0-23                   | 0*             |                        |                | Wildtype |              |
| C_80    | SUP53     | SUP       | Cul-de-sac (L)      | Macro          | G12C           | 0-0049                 | 0*             |                        |                | Wildtype |              |
| C_80    | SUP53     | SUP       | Cul-de-sac (L)      | Macro          | G12D           | 0-012                  | 0*             |                        |                | Wildtype |              |
| C_80    | SUP53     | SUP       | Cul-de-sac (L)      | Macro          | G12R           | 0-0020                 | 0*             |                        |                | Wildtype |              |
| C_80    | SUP53     | SUP       | Cul-de-sac (L)      | Macro          | G12V           | 0-0078                 | 0-018          | 0-0097                 | 0-0077         | Wildtype |              |
| C_80    | SUP53     | SUP       | Cul-de-sac (L)      | Macro          | G12A           | 0-014                  | 0-14           | 0*                     | 0-64           | Mutant   | G12A         |

| Case ID | Sample ID | Endo type | Anatomical Location | Enrich. method | Variant tested | Multi. cut-off VAF (%) | Multi. VAF (%) | Indiv. cut-off VAF (%) | Indiv. VAF (%) | Result   | KRAS Variant |
|---------|-----------|-----------|---------------------|----------------|----------------|------------------------|----------------|------------------------|----------------|----------|--------------|
| C_80    | SUP53     | SUP       | Cul-de-sac (L)      | Macro          | G12S           | 0-035                  | 0-025          |                        |                | Wildtype |              |
| C_80    | SUP102    | SUP       | Cul-de-sac (R)      | Macro          | G12C           | 0-0058                 | 0*             |                        |                | Wildtype |              |
| C_80    | SUP102    | SUP       | Cul-de-sac (R)      | Macro          | G12D           | 0-084                  | 0-0058         |                        |                | Wildtype |              |
| C_80    | SUP102    | SUP       | Cul-de-sac (R)      | Macro          | G12R           | 0*                     | 0*             |                        |                | Wildtype |              |
| C_80    | SUP102    | SUP       | Cul-de-sac (R)      | Macro          | G12V           | 0-0036                 | 0*             |                        |                | Wildtype |              |
| C_80    | SUP102    | SUP       | Cul-de-sac (R)      | Macro          | G12A           | 0-0022                 | 0*             |                        |                | Wildtype |              |
| C_80    | SUP102    | SUP       | Cul-de-sac (R)      | Macro          | G12S           | 0-046                  | 0-0019         |                        |                | Wildtype |              |
| C_81    | SUP34     | SUP       | Fallopian tube (L)  | Macro          | G12C           | 0-0049                 | 0-012          | 0-025                  | 0-014          | Wildtype |              |
| C_81    | SUP34     | SUP       | Fallopian tube (L)  | Macro          | G12D           | 0-012                  | 0-062          | 0-62                   | 0-57           | Wildtype |              |
| C_81    | SUP34     | SUP       | Fallopian tube (L)  | Macro          | G12R           | 0-0020                 | 0*             |                        |                | Wildtype |              |
| C_81    | SUP34     | SUP       | Fallopian tube (L)  | Macro          | G12V           | 0-0078                 | 0-0074         | 0-0097                 | 0-0082         | Wildtype |              |
| C_81    | SUP34     | SUP       | Fallopian tube (L)  | Macro          | G12A           | 0-014                  | 0-010          |                        |                | Wildtype |              |
| C_81    | SUP34     | SUP       | Fallopian tube (L)  | Macro          | G12S           | 0-035                  | 0-020          |                        |                | Wildtype |              |
| C_81    | SUP103    | SUP       | Ovary (L)           | Macro          | G12C           | 0-0058                 | 0*             |                        |                | Wildtype |              |
| C_81    | SUP103    | SUP       | Ovary (L)           | Macro          | G12D           | 0-084                  | 0-018          |                        |                | Wildtype |              |
| C_81    | SUP103    | SUP       | Ovary (L)           | Macro          | G12R           | 0*                     | 0*             |                        |                | Wildtype |              |
| C_81    | SUP103    | SUP       | Ovary (L)           | Macro          | G12V           | 0-0036                 | 0-0050         | 0-0053                 | 0*             | Wildtype |              |
| C_81    | SUP103    | SUP       | Ovary (L)           | Macro          | G12A           | 0-0022                 | 0*             |                        |                | Wildtype |              |
| C_81    | SUP103    | SUP       | Ovary (L)           | Macro          | G12S           | 0-046                  | 0-015          |                        |                | Wildtype |              |
| C_82    | DIE31     | DIE       | Rectum              | Macro          | G12C           | 0-24                   | 0-059          |                        |                | Wildtype |              |
| C_82    | DIE31     | DIE       | Rectum              | Macro          | G12D           | 0-24                   | 0-059          |                        |                | Wildtype |              |
| C_82    | DIE31     | DIE       | Rectum              | Macro          | G12R           | 0-0048                 | 0*             |                        |                | Wildtype |              |
| C_82    | DIE31     | DIE       | Rectum              | Macro          | G12V           | 0-0060                 | 0*             |                        |                | Wildtype |              |
| C_82    | DIE31     | DIE       | Rectum              | Macro          | G12A           | 0*                     | 0*             |                        |                | Wildtype |              |
| C_82    | DIE31     | DIE       | Rectum              | Macro          | G12S           | 0-23                   | 0-030          |                        |                | Wildtype |              |
| C_82    | DIE32     | DIE       | Appendix            | Macro          | G12C           | 0-24                   | 0-088          |                        |                | Wildtype |              |
| C_82    | DIE32     | DIE       | Appendix            | Macro          | G12D           | 0-24                   | 0-088          |                        |                | Wildtype |              |
| C_82    | DIE32     | DIE       | Appendix            | Macro          | G12R           | 0-0048                 | 0*             |                        |                | Wildtype |              |

| Case ID | Sample ID | Endo type | Anatomical Location | Enrich. method | Variant tested | Multi. cut-off VAF (%)       | Multi. VAF (%)               | Indiv. cut-off VAF (%) | Indiv. VAF (%) | Result   | KRAS Variant |
|---------|-----------|-----------|---------------------|----------------|----------------|------------------------------|------------------------------|------------------------|----------------|----------|--------------|
| C_82    | DIE32     | DIE       | Appendix            | Macro          | G12V           | 0.0060                       | 0*                           |                        |                | Wildtype |              |
| C_82    | DIE32     | DIE       | Appendix            | Macro          | G12A           | 0*                           | 0*                           |                        |                | Wildtype |              |
| C_82    | DIE32     | DIE       | Appendix            | Macro          | G12S           | 0.23                         | 0.036                        |                        |                | Wildtype |              |
| C_82    | DIE33     | DIE       | Fallopian tube (R)  | Macro          | G12C           | 0.24                         | 0.032                        |                        |                | Wildtype |              |
| C_82    | DIE33     | DIE       | Fallopian tube (R)  | Macro          | G12D           | 0.24                         | 0.032                        |                        |                | Wildtype |              |
| C_82    | DIE33     | DIE       | Fallopian tube (R)  | Macro          | G12R           | 0.0048                       | 0*                           |                        |                | Wildtype |              |
| C_82    | DIE33     | DIE       | Fallopian tube (R)  | Macro          | G12V           | 0.0060                       | 0.019                        | 0.019                  | 0*             | Wildtype |              |
| C_82    | DIE33     | DIE       | Fallopian tube (R)  | Macro          | G12A           | 0*                           | 0*                           |                        |                | Wildtype |              |
| C_82    | DIE33     | DIE       | Fallopian tube (R)  | Macro          | G12S           | 0.23                         | 0.097                        | 0.67                   | 0.35           | Wildtype |              |
| C_82    | DIE34     | DIE       | Vagina              | Macro          | G12C           | 0.24                         | 0.0048                       |                        |                | Wildtype |              |
| C_82    | DIE34     | DIE       | Vagina              | Macro          | G12D           | 0.24                         | 0.0048                       |                        |                | Wildtype |              |
| C_82    | DIE34     | DIE       | Vagina              | Macro          | G12R           | 0.0048                       | 0*                           |                        |                | Wildtype |              |
| C_82    | DIE34     | DIE       | Vagina              | Macro          | G12V           | 0.0060                       | 0.0048                       |                        |                | Wildtype |              |
| C_82    | DIE34     | DIE       | Vagina              | Macro          | G12A           | 0*                           | 0*                           |                        |                | Wildtype |              |
| C_82    | DIE34     | DIE       | Vagina              | Macro          | G12S           | 0.23                         | 0.029                        |                        |                | Wildtype |              |
| C_82    | DIE35     | DIE       | Vagina              | Macro          | G12C           | 0.29                         | 0.076                        | 0.030                  | 0*             | Wildtype |              |
| C_82    | DIE35     | DIE       | Vagina              | Macro          | G12D           | 0.24                         | 0.091                        | 1.0                    | 0.186          | Wildtype |              |
| C_82    | DIE35     | DIE       | Vagina              | Macro          | G12R           | 0.0048                       | 0*                           | 0.0020                 | 0*             | Wildtype |              |
| C_82    | DIE35     | DIE       | Vagina              | Macro          | G12V           | failed - not enough droplets | failed - not enough droplets | 0.010                  | 0*             | Wildtype |              |
| C_82    | DIE35     | DIE       | Vagina              | Macro          | G12A           | 0*                           | 0*                           | 0.0049                 | 0*             | Wildtype |              |
| C_82    | DIE35     | DIE       | Vagina              | Macro          | G12S           | 0.23                         | 0.030                        | 0.73                   | 0.31           | Wildtype |              |
| C_82    | DIE36     | DIE       | Cervix Uteri (P)    | Macro          | G12C           | 0.010                        | 0*                           |                        |                | Wildtype |              |
| C_82    | DIE36     | DIE       | Cervix Uteri (P)    | Macro          | G12D           | 0.043                        | 0.0069                       |                        |                | Wildtype |              |
| C_82    | DIE36     | DIE       | Cervix Uteri (P)    | Macro          | G12R           | 0.0016                       | 0*                           |                        |                | Wildtype |              |
| C_82    | DIE36     | DIE       | Cervix Uteri (P)    | Macro          | G12V           | 0.010                        | 0.0035                       |                        |                | Wildtype |              |
| C_82    | DIE36     | DIE       | Cervix Uteri (P)    | Macro          | G12A           | 0.0046                       | 0.0035                       |                        |                | Wildtype |              |
| C_82    | DIE36     | DIE       | Cervix Uteri (P)    | Macro          | G12S           | 0.085                        | 0.028                        | 1.2                    | 0.20           | Wildtype |              |

| Case ID | Sample ID | Endo type | Anatomical Location | Enrich. method | Variant tested | Multi. cut-off VAF (%) | Multi. VAF (%) | Indiv. cut-off VAF (%) | Indiv. VAF (%) | Result   | KRAS Variant |
|---------|-----------|-----------|---------------------|----------------|----------------|------------------------|----------------|------------------------|----------------|----------|--------------|
| C_82    | OMA24     | OMA       | Ovary (R)           | Macro          | G12C           | 0*                     | 0*             |                        |                | Wildtype |              |
| C_82    | OMA24     | OMA       | Ovary (R)           | Macro          | G12D           | 0-027                  | 0-0038         |                        |                | Wildtype |              |
| C_82    | OMA24     | OMA       | Ovary (R)           | Macro          | G12R           | 0*                     | 0*             |                        |                | Wildtype |              |
| C_82    | OMA24     | OMA       | Ovary (R)           | Macro          | G12V           | 0*                     | 0*             | 0-0065                 | 0-0034         | Wildtype |              |
| C_82    | OMA24     | OMA       | Ovary (R)           | Macro          | G12A           | 0-0021                 | 0-0037         | 0*                     | 0-065          | Mutant   | G12A         |
| C_82    | OMA24     | OMA       | Ovary (R)           | Macro          | G12S           | 0-021                  | 0-0060         |                        |                | Wildtype |              |
| C_83    | OMA25     | OMA       | Ovary (R)           | Macro          | G12C           | 0-012                  | 0-18           | 0-036                  | 0*             | Wildtype |              |
| C_83    | OMA25     | OMA       | Ovary (R)           | Macro          | G12D           | 0-017                  | 0-22           | 0-71                   | 0-74           | Mutant   | G12D         |
| C_83    | OMA25     | OMA       | Ovary (R)           | Macro          | G12R           | 0*                     | 0*             |                        |                | Wildtype |              |
| C_83    | OMA25     | OMA       | Ovary (R)           | Macro          | G12V           | 0-0097                 | 0-028          | 0*                     | 0-081          | Mutant   | G12V         |
| C_83    | OMA25     | OMA       | Ovary (R)           | Macro          | G12A           | 0*                     | 0*             |                        |                | Wildtype |              |
| C_83    | OMA25     | OMA       | Ovary (R)           | Macro          | G12S           | 0-038                  | 0-029          |                        |                | Wildtype |              |
| C_83    | OMA44     | OMA       | Ovary (L)           | Macro          | G12C           | 0-0058                 | 0*             |                        |                | Wildtype |              |
| C_83    | OMA44     | OMA       | Ovary (L)           | Macro          | G12D           | 0-084                  | 0-0089         |                        |                | Wildtype |              |
| C_83    | OMA44     | OMA       | Ovary (L)           | Macro          | G12R           | 0*                     | 0-0022         | 0-0020                 | 0*             | Wildtype |              |
| C_83    | OMA44     | OMA       | Ovary (L)           | Macro          | G12V           | 0-0036                 | 0-0044         | 0-0053                 | 0-0046         | Wildtype |              |
| C_83    | OMA44     | OMA       | Ovary (L)           | Macro          | G12A           | 0-0022                 | 0*             |                        |                | Wildtype |              |
| C_83    | OMA44     | OMA       | Ovary (L)           | Macro          | G12S           | 0-046                  | 0-033          |                        |                | Wildtype |              |
| C_84    | SUP35     | SUP       | Ovary (L)           | Macro          | G12C           | 0-0049                 | 0*             |                        |                | Wildtype |              |
| C_84    | SUP35     | SUP       | Ovary (L)           | Macro          | G12D           | 0-012                  | 0-015          | 0-62                   | 0-21           | Wildtype |              |
| C_84    | SUP35     | SUP       | Ovary (L)           | Macro          | G12R           | 0-0020                 | 0*             |                        |                | Wildtype |              |
| C_84    | SUP35     | SUP       | Ovary (L)           | Macro          | G12V           | 0-0078                 | 0-0048         | 0-0097                 | 0*             | Wildtype |              |
| C_84    | SUP35     | SUP       | Ovary (L)           | Macro          | G12A           | 0-014                  | 0*             |                        |                | Wildtype |              |
| C_84    | SUP35     | SUP       | Ovary (L)           | Macro          | G12S           | 0-035                  | 0-0049         |                        |                | Wildtype |              |
| C_85    | DIE63     | DIE       | Uterosacral (L)     | Macro          | G12C           | 0-24                   | 0-055          |                        |                | Wildtype |              |
| C_85    | DIE63     | DIE       | Uterosacral (L)     | Macro          | G12D           | 0-24                   | 0-055          |                        |                | Wildtype |              |
| C_85    | DIE63     | DIE       | Uterosacral (L)     | Macro          | G12R           | 0-0048                 | 0*             |                        |                | Wildtype |              |
| C_85    | DIE63     | DIE       | Uterosacral (L)     | Macro          | G12V           | 0-0060                 | 0-014          | 0-019                  | 0-046          | Mutant   | G12V         |

| Case ID | Sample ID | Endo type | Anatomical Location | Enrich. method | Variant tested | Multi. cut-off VAF (%) | Multi. VAF (%) | Indiv. cut-off VAF (%) | Indiv. VAF (%) | Result   | KRAS Variant |
|---------|-----------|-----------|---------------------|----------------|----------------|------------------------|----------------|------------------------|----------------|----------|--------------|
| C_85    | DIE63     | DIE       | Uterosacral (L)     | Macro          | G12A           | 0*                     | 0*             |                        |                | Wildtype |              |
| C_85    | DIE63     | DIE       | Uterosacral (L)     | Macro          | G12S           | 0.23                   | 0.12           | 0.67                   | 0.56           | Wildtype |              |
| C_86    | SUP54     | SUP       | Uterosacral (R)     | Macro          | G12C           | 0.0049                 | 0*             |                        |                | Wildtype |              |
| C_86    | SUP54     | SUP       | Uterosacral (R)     | Macro          | G12D           | 0.012                  | 0.044          | 0.62                   | 0.066          | Wildtype |              |
| C_86    | SUP54     | SUP       | Uterosacral (R)     | Macro          | G12R           | 0.0020                 | 0*             |                        |                | Wildtype |              |
| C_86    | SUP54     | SUP       | Uterosacral (R)     | Macro          | G12V           | 0.0078                 | 0.0088         | 0.0060                 | 0*             | Wildtype |              |
| C_86    | SUP54     | SUP       | Uterosacral (R)     | Macro          | G12A           | 0.014                  | 0.044          | 0*                     | 0*             | Wildtype |              |
| C_86    | SUP54     | SUP       | Uterosacral (R)     | Macro          | G12S           | 0.035                  | 0.19           | 1.2                    | 0.40           | Wildtype |              |
| C_87    | SUP36     | SUP       | Pelvic sidewall (L) | Macro          | G12C           | 0.0041                 | 0*             |                        |                | Wildtype |              |
| C_87    | SUP36     | SUP       | Pelvic sidewall (L) | Macro          | G12D           | 0.018                  | 0.021          | 0.73                   | 0.10           | Wildtype |              |
| C_87    | SUP36     | SUP       | Pelvic sidewall (L) | Macro          | G12R           | 0.0014                 | 0*             |                        |                | Wildtype |              |
| C_87    | SUP36     | SUP       | Pelvic sidewall (L) | Macro          | G12V           | 0.00070                | 0.042          | 0.0060                 | 0.17           | Mutant   | G12V         |
| C_87    | SUP36     | SUP       | Pelvic sidewall (L) | Macro          | G12A           | 0*                     | 0*             |                        |                | Wildtype |              |
| C_87    | SUP36     | SUP       | Pelvic sidewall (L) | Macro          | G12S           | 0.033                  | 0.057          | 0.44                   | 0.28           | Wildtype |              |
| C_88    | OMA26     | OMA       | Ovary (L)           | Macro          | G12C           | 0.012                  | 0.030          | 0.036                  | 0*             | Wildtype |              |
| C_88    | OMA26     | OMA       | Ovary (L)           | Macro          | G12D           | 0.017                  | 0.033          | 0.71                   | 0.24           | Wildtype |              |
| C_88    | OMA26     | OMA       | Ovary (L)           | Macro          | G12R           | 0*                     | 0*             |                        |                | Wildtype |              |
| C_88    | OMA26     | OMA       | Ovary (L)           | Macro          | G12V           | 0.0097                 | 0.0037         |                        |                | Wildtype |              |
| C_88    | OMA26     | OMA       | Ovary (L)           | Macro          | G12A           | 0*                     | 0*             |                        |                | Wildtype |              |
| C_88    | OMA26     | OMA       | Ovary (L)           | Macro          | G12S           | 0.038                  | 0.019          |                        |                | Wildtype |              |
| C_88    | SUP37     | SUP       | Fallopian tube (L)  | Macro          | G12C           | 0.0049                 | 0.023          | 0.0048                 | 0*             | Wildtype |              |
| C_88    | SUP37     | SUP       | Fallopian tube (L)  | Macro          | G12D           | 0.012                  | 0.29           | 0.62                   | 1.1            | Mutant   | G12D         |
| C_88    | SUP37     | SUP       | Fallopian tube (L)  | Macro          | G12R           | 0.0020                 | 0*             |                        |                | Wildtype |              |
| C_88    | SUP37     | SUP       | Fallopian tube (L)  | Macro          | G12V           | 0.0078                 | 0.0046         | 0.0097                 | 0.0095         | Wildtype |              |
| C_88    | SUP37     | SUP       | Fallopian tube (L)  | Macro          | G12A           | 0.014                  | 0.023          | 0*                     | 0*             | Wildtype |              |
| C_88    | SUP37     | SUP       | Fallopian tube (L)  | Macro          | G12S           | 0.035                  | 0.074          | 1.2                    | 0.33           | Wildtype |              |
| C_88    | SUP104    | SUP       | Pelvic sidewall (L) | Macro          | G12C           | 0.0058                 | 0*             |                        |                | Wildtype |              |
| C_88    | SUP104    | SUP       | Pelvic sidewall (L) | Macro          | G12D           | 0.084                  | 0.010          |                        |                | Wildtype |              |

| Case ID | Sample ID | Endo type | Anatomical Location | Enrich. method | Variant tested | Multi. cut-off VAF (%) | Multi. VAF (%) | Indiv. cut-off VAF (%) | Indiv. VAF (%) | Result   | KRAS Variant |
|---------|-----------|-----------|---------------------|----------------|----------------|------------------------|----------------|------------------------|----------------|----------|--------------|
| C_88    | SUP104    | SUP       | Pelvic sidewall (L) | Macro          | G12R           | 0*                     | 0*             |                        |                | Wildtype |              |
| C_88    | SUP104    | SUP       | Pelvic sidewall (L) | Macro          | G12V           | 0-0036                 | 0*             |                        |                | Wildtype |              |
| C_88    | SUP104    | SUP       | Pelvic sidewall (L) | Macro          | G12A           | 0-0022                 | 0*             |                        |                | Wildtype |              |
| C_88    | SUP104    | SUP       | Pelvic sidewall (L) | Macro          | G12S           | 0-046                  | 0-0068         |                        |                | Wildtype |              |
| C_89    | DIE66     | DIE       | Uterosacral (L)     | Macro          | G12C           | 0-24                   | 0-13           |                        |                | Wildtype |              |
| C_89    | DIE66     | DIE       | Uterosacral (L)     | Macro          | G12D           | 0-24                   | 0-13           | 0-35                   | 0-55           | Mutant   | G12D         |
| C_89    | DIE66     | DIE       | Uterosacral (L)     | Macro          | G12R           | 0-0048                 | 0*             |                        |                | Wildtype |              |
| C_89    | DIE66     | DIE       | Uterosacral (L)     | Macro          | G12V           | 0-0060                 | 0-0040         |                        |                | Wildtype |              |
| C_89    | DIE66     | DIE       | Uterosacral (L)     | Macro          | G12A           | 0*                     | 0*             |                        |                | Wildtype |              |
| C_89    | DIE66     | DIE       | Uterosacral (L)     | Macro          | G12S           | 0-23                   | 0-074          | 0-67                   | 0-33           | Wildtype |              |
| C_89    | DIE67     | DIE       | Uterosacral (L)     | Macro          | G12C           | 0-24                   | 0-0028         |                        |                | Wildtype |              |
| C_89    | DIE67     | DIE       | Uterosacral (L)     | Macro          | G12D           | 0-24                   | 0-047          | 0-35                   | 0-79           | Mutant   | G12D         |
| C_89    | DIE67     | DIE       | Uterosacral (L)     | Macro          | G12R           | 0-0048                 | 0*             |                        |                | Wildtype |              |
| C_89    | DIE67     | DIE       | Uterosacral (L)     | Macro          | G12V           | 0-0060                 | 0-011          | 0-019                  | 0-43           | Mutant   | G12V         |
| C_89    | DIE67     | DIE       | Uterosacral (L)     | Macro          | G12A           | 0*                     | 0*             |                        |                | Wildtype |              |
| C_89    | DIE67     | DIE       | Uterosacral (L)     | Macro          | G12S           | 0-23                   | 0-0083         |                        |                | Wildtype |              |
| C_90    | DIE53     | DIE       | Uterosacral (L)     | Macro          | G12C           | 0-34                   | 0-40           | 0-12                   | 0-33           | Mutant   | G12C         |
| C_90    | DIE53     | DIE       | Uterosacral (L)     | Macro          | G12D           | 0-24                   | 0-23           | 0-35                   | 0-65           | Mutant   | G12D         |
| C_90    | DIE53     | DIE       | Uterosacral (L)     | Macro          | G12R           | 0-0048                 | 0*             | 0-0080                 | 0*             | Wildtype |              |
| C_90    | DIE53     | DIE       | Uterosacral (L)     | Macro          | G12V           | 0-0060                 | 0*             | 0-019                  | 0-0086         | Wildtype |              |
| C_90    | DIE53     | DIE       | Uterosacral (L)     | Macro          | G12A           | 0*                     | 0*             | 0*                     | 0*             | Wildtype |              |
| C_90    | DIE53     | DIE       | Uterosacral (L)     | Macro          | G12S           | 0-23                   | 0-13           | 0-67                   | 0-47           | Wildtype |              |
| C_90    | DIE54     | DIE       | Uterosacral (L)     | Macro          | G12C           | 0-24                   | 0-049          |                        |                | Wildtype |              |
| C_90    | DIE54     | DIE       | Uterosacral (L)     | Macro          | G12D           | 0-24                   | 0-049          | 0-35                   | 0-37           | Mutant   | G12D         |
| C_90    | DIE54     | DIE       | Uterosacral (L)     | Macro          | G12R           | 0-0048                 | 0*             |                        |                | Wildtype |              |
| C_90    | DIE54     | DIE       | Uterosacral (L)     | Macro          | G12V           | 0-0060                 | 0-0027         |                        |                | Wildtype |              |
| C_90    | DIE54     | DIE       | Uterosacral (L)     | Macro          | G12A           | 0*                     | 0*             |                        |                | Wildtype |              |
| C_90    | DIE54     | DIE       | Uterosacral (L)     | Macro          | G12S           | 0-23                   | 0-019          |                        |                | Wildtype |              |

| Case ID | Sample ID | Endo type | Anatomical Location | Enrich. method | Variant tested | Multi. cut-off VAF (%) | Multi. VAF (%) | Indiv. cut-off VAF (%) | Indiv. VAF (%) | Result   | KRAS Variant |
|---------|-----------|-----------|---------------------|----------------|----------------|------------------------|----------------|------------------------|----------------|----------|--------------|
| C_90    | DIE55     | DIE       | Uterosacral (R)     | Macro          | G12C           | 0.24                   | 0.20           |                        |                | Wildtype |              |
| C_90    | DIE55     | DIE       | Uterosacral (R)     | Macro          | G12D           | 0.24                   | 0.29           | 0.35                   | 0.59           | Mutant   | G12D         |
| C_90    | DIE55     | DIE       | Uterosacral (R)     | Macro          | G12R           | 0.0048                 | 0*             |                        |                | Wildtype |              |
| C_90    | DIE55     | DIE       | Uterosacral (R)     | Macro          | G12V           | 0.0060                 | 0.039          | 0.019                  | 0.16           | Mutant   | G12V         |
| C_90    | DIE55     | DIE       | Uterosacral (R)     | Macro          | G12A           | 0*                     | 0*             |                        |                | Wildtype |              |
| C_90    | DIE55     | DIE       | Uterosacral (R)     | Macro          | G12S           | 0.23                   | 0.031          |                        |                | Wildtype |              |
| C_90    | DIE56     | DIE       | Uterosacral (R)     | Macro          | G12C           | 0.24                   | 0.0019         |                        |                | Wildtype |              |
| C_90    | DIE56     | DIE       | Uterosacral (R)     | Macro          | G12D           | 0.24                   | 0.0019         |                        |                | Wildtype |              |
| C_90    | DIE56     | DIE       | Uterosacral (R)     | Macro          | G12R           | 0.0048                 | 0*             |                        |                | Wildtype |              |
| C_90    | DIE56     | DIE       | Uterosacral (R)     | Macro          | G12V           | 0.0060                 | 0*             |                        |                | Wildtype |              |
| C_90    | DIE56     | DIE       | Uterosacral (R)     | Macro          | G12A           | 0*                     | 0*             |                        |                | Wildtype |              |
| C_90    | DIE56     | DIE       | Uterosacral (R)     | Macro          | G12S           | 0.23                   | 0.0095         |                        |                | Wildtype |              |
| C_90    | SUP59     | SUP       | Pelvic sidewall (R) | Macro          | G12C           | 0.0049                 | 0.012          | 0.0048                 | 0*             | Wildtype |              |
| C_90    | SUP59     | SUP       | Pelvic sidewall (R) | Macro          | G12D           | 0.012                  | 0.082          | 0.62                   | 0.24           | Wildtype |              |
| C_90    | SUP59     | SUP       | Pelvic sidewall (R) | Macro          | G12R           | 0.0020                 | 0*             |                        |                | Wildtype |              |
| C_90    | SUP59     | SUP       | Pelvic sidewall (R) | Macro          | G12V           | 0.0078                 | 0*             |                        |                | Wildtype |              |
| C_90    | SUP59     | SUP       | Pelvic sidewall (R) | Macro          | G12A           | 0.014                  | 0.012          |                        |                | Wildtype |              |
| C_90    | SUP59     | SUP       | Pelvic sidewall (R) | Macro          | G12S           | 0.035                  | 0.059          | 1.2                    | 0.17           | Wildtype |              |
| C_91    | SUP60     | SUP       | Pelvic sidewall (L) | Macro          | G12C           | 0.0049                 | 0.0033         |                        |                | Wildtype |              |
| C_91    | SUP60     | SUP       | Pelvic sidewall (L) | Macro          | G12D           | 0.012                  | 0.013          | 0.62                   | 0.13           | Wildtype |              |
| C_91    | SUP60     | SUP       | Pelvic sidewall (L) | Macro          | G12R           | 0.0020                 | 0*             |                        |                | Wildtype |              |
| C_91    | SUP60     | SUP       | Pelvic sidewall (L) | Macro          | G12V           | 0.0078                 | 0.0066         | 0.0097                 | 0*             | Wildtype |              |
| C_91    | SUP60     | SUP       | Pelvic sidewall (L) | Macro          | G12A           | 0.014                  | 0.017          | 0*                     | 0*             | Wildtype |              |
| C_91    | SUP60     | SUP       | Pelvic sidewall (L) | Macro          | G12S           | 0.035                  | 0.033          | 0.44                   | 0.18           | Wildtype |              |
| C_92    | SUP61     | SUP       | Pelvic sidewall (R) | Macro          | G12C           | 0.0049                 | 0.030          | 0.0048                 | 0*             | Wildtype |              |
| C_92    | SUP61     | SUP       | Pelvic sidewall (R) | Macro          | G12D           | 0.012                  | 0.12           | 0.62                   | 0.52           | Wildtype |              |
| C_92    | SUP61     | SUP       | Pelvic sidewall (R) | Macro          | G12R           | 0.0020                 | 0*             |                        |                | Wildtype |              |
| C_92    | SUP61     | SUP       | Pelvic sidewall (R) | Macro          | G12V           | 0.0078                 | 0.0043         | 0.0060                 | 0*             | Mutant   | G12V         |

| Case ID | Sample ID | Endo type | Anatomical Location | Enrich. method | Variant tested | Multi. cut-off VAF (%)       | Multi. VAF (%)               | Indiv. cut-off VAF (%) | Indiv. VAF (%) | Result   | KRAS Variant |
|---------|-----------|-----------|---------------------|----------------|----------------|------------------------------|------------------------------|------------------------|----------------|----------|--------------|
| C_92    | SUP61     | SUP       | Pelvic sidewall (R) | Macro          | G12A           | 0.014                        | 0.035                        | 0*                     | 0*             | Wildtype |              |
| C_92    | SUP61     | SUP       | Pelvic sidewall (R) | Macro          | G12S           | 0.035                        | 0.065                        | 1.2                    | 0.37           | Wildtype |              |
| C_93    | OMA33     | OMA       | Ovary (B)           | Macro          | G12C           | failed - not enough droplets | failed - not enough droplets | 0.0039                 | 0.0013         | Wildtype |              |
| C_93    | OMA33     | OMA       | Ovary (B)           | Macro          | G12D           | failed - not enough droplets | failed - not enough droplets | 1.5                    | 0.28           | Wildtype |              |
| C_93    | OMA33     | OMA       | Ovary (B)           | Macro          | G12R           | failed - not enough droplets | failed - not enough droplets | 0.0020                 | 0*             | Wildtype |              |
| C_93    | OMA33     | OMA       | Ovary (B)           | Macro          | G12V           | failed - not enough droplets | failed - not enough droplets | 0.0039                 | 0*             | Wildtype |              |
| C_93    | OMA33     | OMA       | Ovary (B)           | Macro          | G12A           | failed - not enough droplets | failed - not enough droplets | 0.0022                 | 0.0013         | Wildtype |              |
| C_93    | OMA33     | OMA       | Ovary (B)           | Macro          | G12S           | failed - not enough droplets | failed - not enough droplets | 0.73                   | 0.12           | Wildtype |              |
| C_94    | DIE57     | DIE       | Uterosacral (L)     | Macro          | G12C           | 0.24                         | 0*                           |                        |                | Wildtype |              |
| C_94    | DIE57     | DIE       | Uterosacral (L)     | Macro          | G12D           | 0.24                         | 0*                           |                        |                | Wildtype |              |
| C_94    | DIE57     | DIE       | Uterosacral (L)     | Macro          | G12R           | 0.0048                       | 0.030                        | 0.0080                 | 0.12           | Mutant   | G12R         |
| C_94    | DIE57     | DIE       | Uterosacral (L)     | Macro          | G12V           | 0.0060                       | 0*                           |                        |                | Wildtype |              |
| C_94    | DIE57     | DIE       | Uterosacral (L)     | Macro          | G12A           | 0*                           | 0*                           |                        |                | Wildtype |              |
| C_94    | DIE57     | DIE       | Uterosacral (L)     | Macro          | G12S           | 0.23                         | 0.068                        | 0.67                   | 0.40           | Wildtype |              |
| C_94    | DIE58     | DIE       | Uterosacral (R)     | Macro          | G12C           | 0.24                         | 0.24                         |                        |                | Wildtype |              |
| C_94    | DIE58     | DIE       | Uterosacral (R)     | Macro          | G12D           | 0.24                         | 0.24                         | 0.35                   | 0.61           | Mutant   | G12D         |
| C_94    | DIE58     | DIE       | Uterosacral (R)     | Macro          | G12R           | 0.0048                       | 0*                           |                        |                | Wildtype |              |
| C_94    | DIE58     | DIE       | Uterosacral (R)     | Macro          | G12V           | 0.0015                       | 0.016                        | 0.010                  | 0*             | Wildtype |              |
| C_94    | DIE58     | DIE       | Uterosacral (R)     | Macro          | G12A           | 0*                           | 0*                           |                        |                | Wildtype |              |



| Case ID | Sample ID | Endo type | Anatomical Location | Enrich. method | Variant tested | Multi. cut-off VAF (%) | Multi. VAF (%) | Indiv. cut-off VAF (%) | Indiv. VAF (%) | Result   | KRAS Variant |
|---------|-----------|-----------|---------------------|----------------|----------------|------------------------|----------------|------------------------|----------------|----------|--------------|
| C_94    | DIE58     | DIE       | Uterosacral (R)     | Macro          | G12S           | 0.23                   | 0*             |                        |                | Wildtype |              |
| C_95    | SUP105    | SUP       | Uterosacral (R)     | Macro          | G12C           | 0.0058                 | 0*             |                        |                | Wildtype |              |
| C_95    | SUP105    | SUP       | Uterosacral (R)     | Macro          | G12D           | 0.084                  | 0.0098         |                        |                | Wildtype |              |
| C_95    | SUP105    | SUP       | Uterosacral (R)     | Macro          | G12R           | 0*                     | 0*             |                        |                | Wildtype |              |
| C_95    | SUP105    | SUP       | Uterosacral (R)     | Macro          | G12V           | 0.0036                 | 0.0016         |                        |                | Wildtype |              |
| C_95    | SUP105    | SUP       | Uterosacral (R)     | Macro          | G12A           | 0.0022                 | 0*             |                        |                | Wildtype |              |
| C_95    | SUP105    | SUP       | Uterosacral (R)     | Macro          | G12S           | 0.046                  | 0.0081         |                        |                | Wildtype |              |
| C_96    | SUP62     | SUP       | Pelvic sidewall (L) | Macro          | G12C           | 0.0049                 | 0.036          | 0.0048                 | 0*             | Wildtype |              |
| C_96    | SUP62     | SUP       | Pelvic sidewall (L) | Macro          | G12D           | 0.012                  | 0.11           | 0.62                   | 0.20           | Wildtype |              |
| C_96    | SUP62     | SUP       | Pelvic sidewall (L) | Macro          | G12R           | 0.0020                 | 0*             |                        |                | Wildtype |              |
| C_96    | SUP62     | SUP       | Pelvic sidewall (L) | Macro          | G12V           | 0.0078                 | 0*             |                        |                | Wildtype |              |
| C_96    | SUP62     | SUP       | Pelvic sidewall (L) | Macro          | G12A           | 0.014                  | 0.072          | 0*                     | 0*             | Wildtype |              |
| C_96    | SUP62     | SUP       | Pelvic sidewall (L) | Macro          | G12S           | 0.035                  | 0.11           | 0.44                   | 0.19           | Wildtype |              |
| C_97    | SUP78     | SUP       | Uterosacral (L)     | Macro          | G12C           | 0*                     | 0*             |                        |                | Wildtype |              |
| C_97    | SUP78     | SUP       | Uterosacral (L)     | Macro          | G12D           | 0.043                  | 0.0015         |                        |                | Wildtype |              |
| C_97    | SUP78     | SUP       | Uterosacral (L)     | Macro          | G12R           | 0*                     | 0*             |                        |                | Wildtype |              |
| C_97    | SUP78     | SUP       | Uterosacral (L)     | Macro          | G12V           | 0.0020                 | 0*             |                        |                | Wildtype |              |
| C_97    | SUP78     | SUP       | Uterosacral (L)     | Macro          | G12A           | 0*                     | 0*             |                        |                | Wildtype |              |
| C_97    | SUP78     | SUP       | Uterosacral (L)     | Macro          | G12S           | 0.031                  | 0.0015         |                        |                | Wildtype |              |
| C_97    | SUP106    | SUP       | Uterus (A)          | Macro          | G12C           | 0.0058                 | 0*             |                        |                | Wildtype |              |
| C_97    | SUP106    | SUP       | Uterus (A)          | Macro          | G12D           | 0.084                  | 0.0030         |                        |                | Wildtype |              |
| C_97    | SUP106    | SUP       | Uterus (A)          | Macro          | G12R           | 0*                     | 0*             |                        |                | Wildtype |              |
| C_97    | SUP106    | SUP       | Uterus (A)          | Macro          | G12V           | 0.0036                 | 0.0015         |                        |                | Wildtype |              |
| C_97    | SUP106    | SUP       | Uterus (A)          | Macro          | G12A           | 0.0022                 | 0*             |                        |                | Wildtype |              |
| C_97    | SUP106    | SUP       | Uterus (A)          | Macro          | G12S           | 0.046                  | 0.0015         |                        |                | Wildtype |              |
| C_98    | DIE104    | DIE       | Periureteric (R)    | Macro          | G12C           | 0.010                  | 0*             |                        |                | Wildtype |              |
| C_98    | DIE104    | DIE       | Periureteric (R)    | Macro          | G12D           | 0.043                  | 0.061          | 0.74                   | 0.31           | Wildtype |              |
| C_98    | DIE104    | DIE       | Periureteric (R)    | Macro          | G12R           | 0.0016                 | 0*             |                        |                | Wildtype |              |

| Case ID | Sample ID | Endo type | Anatomical Location | Enrich. method | Variant tested | Multi. cut-off VAF (%) | Multi. VAF (%) | Indiv. cut-off VAF (%) | Indiv. VAF (%) | Result   | KRAS Variant |
|---------|-----------|-----------|---------------------|----------------|----------------|------------------------|----------------|------------------------|----------------|----------|--------------|
| C_98    | DIE104    | DIE       | Periureteric (R)    | Macro          | G12V           | 0-010                  | 0*             |                        |                | Wildtype |              |
| C_98    | DIE104    | DIE       | Periureteric (R)    | Macro          | G12A           | 0-0046                 | 0*             |                        |                | Wildtype |              |
| C_98    | DIE104    | DIE       | Periureteric (R)    | Macro          | G12S           | 0-085                  | 0-012          |                        |                | Wildtype |              |
| C_99    | DIE51     | DIE       | Bladder             | Macro          | G12C           | 0-24                   | 0-014          |                        |                | Wildtype |              |
| C_99    | DIE51     | DIE       | Bladder             | Macro          | G12D           | 0-24                   | 0-014          |                        |                | Wildtype |              |
| C_99    | DIE51     | DIE       | Bladder             | Macro          | G12R           | 0-0048                 | 0*             |                        |                | Wildtype |              |
| C_99    | DIE51     | DIE       | Bladder             | Macro          | G12V           | 0-0060                 | 0*             |                        |                | Wildtype |              |
| C_99    | DIE51     | DIE       | Bladder             | Macro          | G12A           | 0*                     | 0*             |                        |                | Wildtype |              |
| C_99    | DIE51     | DIE       | Bladder             | Macro          | G12S           | 0-23                   | 0-0068         |                        |                | Wildtype |              |
| C_99    | DIE52     | DIE       | Cul-de-sac (L)      | Macro          | G12C           | 0-24                   | 0-018          |                        |                | Wildtype |              |
| C_99    | DIE52     | DIE       | Cul-de-sac (L)      | Macro          | G12D           | 0-24                   | 0-018          |                        |                | Wildtype |              |
| C_99    | DIE52     | DIE       | Cul-de-sac (L)      | Macro          | G12R           | 0-0048                 | 0*             |                        |                | Wildtype |              |
| C_99    | DIE52     | DIE       | Cul-de-sac (L)      | Macro          | G12V           | 0-0060                 | 0-085          | 0-019                  | 0-55           | Mutant   | G12V         |
| C_99    | DIE52     | DIE       | Cul-de-sac (L)      | Macro          | G12A           | 0*                     | 0*             |                        |                | Wildtype |              |
| C_99    | DIE52     | DIE       | Cul-de-sac (L)      | Macro          | G12S           | 0-23                   | 0-031          |                        |                | Wildtype |              |
| C_99    | SUP79     | SUP       | Pelvic sidewall (R) | Macro          | G12C           | 0-0058                 | 0*             |                        |                | Wildtype |              |
| C_99    | SUP79     | SUP       | Pelvic sidewall (R) | Macro          | G12D           | 0-084                  | 0-0013         |                        |                | Wildtype |              |
| C_99    | SUP79     | SUP       | Pelvic sidewall (R) | Macro          | G12R           | 0*                     | 0*             |                        |                | Wildtype |              |
| C_99    | SUP79     | SUP       | Pelvic sidewall (R) | Macro          | G12V           | 0-0036                 | 0*             |                        |                | Wildtype |              |
| C_99    | SUP79     | SUP       | Pelvic sidewall (R) | Macro          | G12A           | 0-0022                 | 0*             |                        |                | Wildtype |              |
| C_99    | SUP79     | SUP       | Pelvic sidewall (R) | Macro          | G12S           | 0-046                  | 0*             |                        |                | Wildtype |              |
| C_99    | SUP107    | SUP       | Uterus (A)          | Macro          | G12C           | 0*                     | 0*             |                        |                | Wildtype |              |
| C_99    | SUP107    | SUP       | Uterus (A)          | Macro          | G12D           | 0-043                  | 0*             |                        |                | Wildtype |              |
| C_99    | SUP107    | SUP       | Uterus (A)          | Macro          | G12R           | 0*                     | 0*             |                        |                | Wildtype |              |
| C_99    | SUP107    | SUP       | Uterus (A)          | Macro          | G12V           | 0-0020                 | 0*             |                        |                | Wildtype |              |
| C_99    | SUP107    | SUP       | Uterus (A)          | Macro          | G12A           | 0*                     | 0*             |                        |                | Wildtype |              |
| C_99    | SUP107    | SUP       | Uterus (A)          | Macro          | G12S           | 0-031                  | 0-0029         |                        |                | Wildtype |              |
| C_100   | SUP63     | SUP       | Uterosacral (R)     | Macro          | G12C           | 0-0049                 | 0*             |                        |                | Wildtype |              |

| Case ID | Sample ID | Endo type | Anatomical Location | Enrich. method | Variant tested | Multi. cut-off VAF (%) | Multi. VAF (%) | Indiv. cut-off VAF (%) | Indiv. VAF (%) | Result   | KRAS Variant |
|---------|-----------|-----------|---------------------|----------------|----------------|------------------------|----------------|------------------------|----------------|----------|--------------|
| C_100   | SUP63     | SUP       | Uterosacral (R)     | Macro          | G12D           | 0-012                  | 0-0070         |                        |                | Wildtype |              |
| C_100   | SUP63     | SUP       | Uterosacral (R)     | Macro          | G12R           | 0-0020                 | 0*             |                        |                | Wildtype |              |
| C_100   | SUP63     | SUP       | Uterosacral (R)     | Macro          | G12V           | 0-0078                 | 0*             |                        |                | Wildtype |              |
| C_100   | SUP63     | SUP       | Uterosacral (R)     | Macro          | G12A           | 0-014                  | 0-014          | 0*                     | 0*             | Wildtype |              |
| C_100   | SUP63     | SUP       | Uterosacral (R)     | Macro          | G12S           | 0-035                  | 0-028          |                        |                | Wildtype |              |
| C_101   | SUP64     | SUP       | Uterosacral (L)     | Macro          | G12C           | 0*                     | 0*             |                        |                | Wildtype |              |
| C_101   | SUP64     | SUP       | Uterosacral (L)     | Macro          | G12D           | 0-027                  | 0-0024         |                        |                | Wildtype |              |
| C_101   | SUP64     | SUP       | Uterosacral (L)     | Macro          | G12R           | 0*                     | 0*             |                        |                | Wildtype |              |
| C_101   | SUP64     | SUP       | Uterosacral (L)     | Macro          | G12V           | 0*                     | 0-0025         | 0-0065                 | 0*             | Wildtype |              |
| C_101   | SUP64     | SUP       | Uterosacral (L)     | Macro          | G12A           | 0-0021                 | 0*             |                        |                | Wildtype |              |
| C_101   | SUP64     | SUP       | Uterosacral (L)     | Macro          | G12S           | 0-021                  | 0-0049         |                        |                | Wildtype |              |
| C_102   | SUP108    | SUP       | Pelvic sidewall (L) | Macro          | G12C           | 0-0058                 | 0*             |                        |                | Wildtype |              |
| C_102   | SUP108    | SUP       | Pelvic sidewall (L) | Macro          | G12D           | 0-084                  | 0*             |                        |                | Wildtype |              |
| C_102   | SUP108    | SUP       | Pelvic sidewall (L) | Macro          | G12R           | 0*                     | 0*             |                        |                | Wildtype |              |
| C_102   | SUP108    | SUP       | Pelvic sidewall (L) | Macro          | G12V           | 0-0036                 | 0-0044         | 0-0053                 | 0-0033         | Wildtype |              |
| C_102   | SUP108    | SUP       | Pelvic sidewall (L) | Macro          | G12A           | 0-0022                 | 0*             |                        |                | Wildtype |              |
| C_102   | SUP108    | SUP       | Pelvic sidewall (L) | Macro          | G12S           | 0-046                  | 0-0073         |                        |                | Wildtype |              |
| C_102   | SUP65     | SUP       | Uterosacral (R)     | Macro          | G12C           | 0*                     | 0*             |                        |                | Wildtype |              |
| C_102   | SUP65     | SUP       | Uterosacral (R)     | Macro          | G12D           | 0-027                  | 0-0041         |                        |                | Wildtype |              |
| C_102   | SUP65     | SUP       | Uterosacral (R)     | Macro          | G12R           | 0*                     | 0*             |                        |                | Wildtype |              |
| C_102   | SUP65     | SUP       | Uterosacral (R)     | Macro          | G12V           | 0*                     | 0-0022         | 0-0065                 | 0-0037         | Wildtype |              |
| C_102   | SUP65     | SUP       | Uterosacral (R)     | Macro          | G12A           | 0-0020                 | 0-0020         | 0*                     | 0-022          | Mutant   | G12A         |
| C_102   | SUP65     | SUP       | Uterosacral (R)     | Macro          | G12S           | 0-021                  | 0-0021         |                        |                | Wildtype |              |
| C_103   | SUP66     | SUP       | Uterosacral (L)     | Macro          | G12C           | 0*                     | 0*             |                        |                | Wildtype |              |
| C_103   | SUP66     | SUP       | Uterosacral (L)     | Macro          | G12D           | 0-027                  | 0-033          | 0-73                   | 0-45           | Wildtype |              |
| C_103   | SUP66     | SUP       | Uterosacral (L)     | Macro          | G12R           | 0*                     | 0*             |                        |                | Wildtype |              |
| C_103   | SUP66     | SUP       | Uterosacral (L)     | Macro          | G12V           | 0*                     | 0-0057         | 0-0065                 | 0*             | Wildtype |              |
| C_103   | SUP66     | SUP       | Uterosacral (L)     | Macro          | G12A           | 0-0021                 | 0-0028         | 0*                     | 0*             | Wildtype |              |

| Case ID | Sample ID | Endo type | Anatomical Location | Enrich. method | Variant tested | Multi. cut-off VAF (%) | Multi. VAF (%) | Indiv. cut-off VAF (%) | Indiv. VAF (%) | Result   | KRAS Variant |
|---------|-----------|-----------|---------------------|----------------|----------------|------------------------|----------------|------------------------|----------------|----------|--------------|
| C_103   | SUP66     | SUP       | Uterosacral (L)     | Macro          | G12S           | 0.021                  | 0.020          |                        |                | Wildtype |              |
| C_104   | SUP67     | SUP       | Cul-de-sac          | Macro          | G12C           | 0*                     | 0*             |                        |                | Wildtype |              |
| C_104   | SUP67     | SUP       | Cul-de-sac          | Macro          | G12D           | 0.027                  | 0.066          | 0.73                   | 0.45           | Wildtype |              |
| C_104   | SUP67     | SUP       | Cul-de-sac          | Macro          | G12R           | 0*                     | 0*             |                        |                | Wildtype |              |
| C_104   | SUP67     | SUP       | Cul-de-sac          | Macro          | G12V           | 0*                     | 0.0032         | 0.0065                 | 0.0037         | Wildtype |              |
| C_104   | SUP67     | SUP       | Cul-de-sac          | Macro          | G12A           | 0.0021                 | 0*             |                        |                | Wildtype |              |
| C_104   | SUP67     | SUP       | Cul-de-sac          | Macro          | G12S           | 0.021                  | 0.016          |                        |                | Wildtype |              |
| C_105   | DIE46     | DIE       | Periureteric (R)    | Macro          | G12C           | 0.24                   | 0.014          |                        |                | Wildtype |              |
| C_105   | DIE46     | DIE       | Periureteric (R)    | Macro          | G12D           | 0.24                   | 0.014          |                        |                | Wildtype |              |
| C_105   | DIE46     | DIE       | Periureteric (R)    | Macro          | G12R           | 0.0048                 | 0*             |                        |                | Wildtype |              |
| C_105   | DIE46     | DIE       | Periureteric (R)    | Macro          | G12V           | 0.0060                 | 0*             |                        |                | Wildtype |              |
| C_105   | DIE46     | DIE       | Periureteric (R)    | Macro          | G12A           | 0*                     | 0*             |                        |                | Wildtype |              |
| C_105   | DIE46     | DIE       | Periureteric (R)    | Macro          | G12S           | 0.23                   | 0.007          |                        |                | Wildtype |              |
| C_105   | DIE47     | DIE       | Pelvic sidewall (L) | Macro          | G12C           | 0.24                   | 0.0099         |                        |                | Wildtype |              |
| C_105   | DIE47     | DIE       | Pelvic sidewall (L) | Macro          | G12D           | 0.24                   | 0.0099         |                        |                | Wildtype |              |
| C_105   | DIE47     | DIE       | Pelvic sidewall (L) | Macro          | G12R           | 0.0048                 | 0*             |                        |                | Wildtype |              |
| C_105   | DIE47     | DIE       | Pelvic sidewall (L) | Macro          | G12V           | 0.0060                 | 0*             |                        |                | Wildtype |              |
| C_105   | DIE47     | DIE       | Pelvic sidewall (L) | Macro          | G12A           | 0*                     | 0*             |                        |                | Wildtype |              |
| C_105   | DIE47     | DIE       | Pelvic sidewall (L) | Macro          | G12S           | 0.23                   | 0.012          |                        |                | Wildtype |              |
| C_105   | DIE48     | DIE       | Periureteric (R)    | Macro          | G12C           | 0.24                   | 0.20           |                        |                | Wildtype |              |
| C_105   | DIE48     | DIE       | Periureteric (R)    | Macro          | G12D           | 0.24                   | 0.20           | 0.35                   | 0.77           | Mutant   | G12D         |
| C_105   | DIE48     | DIE       | Periureteric (R)    | Macro          | G12R           | 0.0048                 | 0*             |                        |                | Wildtype |              |
| C_105   | DIE48     | DIE       | Periureteric (R)    | Macro          | G12V           | 0.0060                 | 0.0068         | 0.010                  | 0.0075         | Wildtype |              |
| C_105   | DIE48     | DIE       | Periureteric (R)    | Macro          | G12A           | 0*                     | 0*             |                        |                | Wildtype |              |
| C_105   | DIE48     | DIE       | Periureteric (R)    | Macro          | G12S           | 0.23                   | 0.034          |                        |                | Wildtype |              |
| C_105   | OMA34     | OMA       | Ovary (L)           | Macro          | G12C           | 0*                     | 0*             |                        |                | Wildtype |              |
| C_105   | OMA34     | OMA       | Ovary (L)           | Macro          | G12D           | 0.043                  | 0.0071         |                        |                | Wildtype |              |
| C_105   | OMA34     | OMA       | Ovary (L)           | Macro          | G12R           | 0*                     | 0*             |                        |                | Wildtype |              |

| Case ID | Sample ID | Endo type | Anatomical Location | Enrich. method | Variant tested | Multi. cut-off VAF (%) | Multi. VAF (%) | Indiv. cut-off VAF (%) | Indiv. VAF (%) | Result   | KRAS Variant |
|---------|-----------|-----------|---------------------|----------------|----------------|------------------------|----------------|------------------------|----------------|----------|--------------|
| C_105   | OMA34     | OMA       | Ovary (L)           | Macro          | G12V           | 0-0020                 | 0-0035         | 0-0039                 | 0-024          | Mutant   | G12V         |
| C_105   | OMA34     | OMA       | Ovary (L)           | Macro          | G12A           | 0*                     | 0*             |                        |                | Wildtype |              |
| C_105   | OMA34     | OMA       | Ovary (L)           | Macro          | G12S           | 0-031                  | 0-013          |                        |                | Wildtype |              |
| C_106   | SUP68     | SUP       | Uterosacral (R)     | Macro          | G12C           | 0*                     | 0*             |                        |                | Wildtype |              |
| C_106   | SUP68     | SUP       | Uterosacral (R)     | Macro          | G12D           | 0-027                  | 0-0030         |                        |                | Wildtype |              |
| C_106   | SUP68     | SUP       | Uterosacral (R)     | Macro          | G12R           | 0*                     | 0*             |                        |                | Wildtype |              |
| C_106   | SUP68     | SUP       | Uterosacral (R)     | Macro          | G12V           | 0*                     | 0-0016         | 0-0065                 | 0-0017         | Wildtype |              |
| C_106   | SUP68     | SUP       | Uterosacral (R)     | Macro          | G12A           | 0-0021                 | 0*             |                        |                | Wildtype |              |
| C_106   | SUP68     | SUP       | Uterosacral (R)     | Macro          | G12S           | 0-021                  | 0-0081         |                        |                | Wildtype |              |
| C_107   | DIE64     | DIE       | Periureteric (L)    | Macro          | G12C           | 0-24                   | 0-011          |                        |                | Wildtype |              |
| C_107   | DIE64     | DIE       | Periureteric (L)    | Macro          | G12D           | 0-24                   | 0-011          |                        |                | Wildtype |              |
| C_107   | DIE64     | DIE       | Periureteric (L)    | Macro          | G12R           | 0-0048                 | 0*             |                        |                | Wildtype |              |
| C_107   | DIE64     | DIE       | Periureteric (L)    | Macro          | G12V           | 0-0060                 | 0*             |                        |                | Wildtype |              |
| C_107   | DIE64     | DIE       | Periureteric (L)    | Macro          | G12A           | 0*                     | 0*             |                        |                | Wildtype |              |
| C_107   | DIE64     | DIE       | Periureteric (L)    | Macro          | G12S           | 0-23                   | 0*             |                        |                | Wildtype |              |
| C_107   | DIE65     | DIE       | Periureteric (L)    | Macro          | G12C           | 0-24                   | 0-0025         |                        |                | Wildtype |              |
| C_107   | DIE65     | DIE       | Periureteric (L)    | Macro          | G12D           | 0-24                   | 0-0025         |                        |                | Wildtype |              |
| C_107   | DIE65     | DIE       | Periureteric (L)    | Macro          | G12R           | 0-0048                 | 0*             |                        |                | Wildtype |              |
| C_107   | DIE65     | DIE       | Periureteric (L)    | Macro          | G12V           | 0-0060                 | 0-0025         |                        |                | Wildtype |              |
| C_107   | DIE65     | DIE       | Periureteric (L)    | Macro          | G12A           | 0*                     | 0*             |                        |                | Wildtype |              |
| C_107   | DIE65     | DIE       | Periureteric (L)    | Macro          | G12S           | 0-23                   | 0-0076         |                        |                | Wildtype |              |
| C_107   | OMA35     | OMA       | Ovary (L)           | Macro          | G12C           | 0*                     | 0*             |                        |                | Wildtype |              |
| C_107   | OMA35     | OMA       | Ovary (L)           | Macro          | G12D           | 0-043                  | 0*             |                        |                | Wildtype |              |
| C_107   | OMA35     | OMA       | Ovary (L)           | Macro          | G12R           | 0*                     | 0*             |                        |                | Wildtype |              |
| C_107   | OMA35     | OMA       | Ovary (L)           | Macro          | G12V           | 0-0020                 | 0*             |                        |                | Wildtype |              |
| C_107   | OMA35     | OMA       | Ovary (L)           | Macro          | G12A           | 0*                     | 0*             |                        |                | Wildtype |              |
| C_107   | OMA35     | OMA       | Ovary (L)           | Macro          | G12S           | 0-031                  | 0-0016         |                        |                | Wildtype |              |
| C_107   | SUP69     | SUP       | Fallopian tube (L)  | Macro          | G12C           | 0*                     | 0*             |                        |                | Wildtype |              |

| Case ID | Sample ID | Endo type | Anatomical Location | Enrich. method | Variant tested | Multi. cut-off VAF (%) | Multi. VAF (%) | Indiv. cut-off VAF (%) | Indiv. VAF (%) | Result   | KRAS Variant |
|---------|-----------|-----------|---------------------|----------------|----------------|------------------------|----------------|------------------------|----------------|----------|--------------|
| C_107   | SUP69     | SUP       | Fallopian tube (L)  | Macro          | G12D           | 0.027                  | 0.0072         |                        |                | Wildtype |              |
| C_107   | SUP69     | SUP       | Fallopian tube (L)  | Macro          | G12R           | 0*                     | 0*             |                        |                | Wildtype |              |
| C_107   | SUP69     | SUP       | Fallopian tube (L)  | Macro          | G12V           | 0*                     | 0.0019         | 0.0065                 | 0.0064         | Wildtype |              |
| C_107   | SUP69     | SUP       | Fallopian tube (L)  | Macro          | G12A           | 0.0021                 | 0*             |                        |                | Wildtype |              |
| C_107   | SUP69     | SUP       | Fallopian tube (L)  | Macro          | G12S           | 0.021                  | 0.0039         |                        |                | Wildtype |              |
| C_108   | OMA36     | OMA       | Ovary (NS)          | Macro          | G12C           | 0*                     | 0*             |                        |                | Wildtype |              |
| C_108   | OMA36     | OMA       | Ovary (NS)          | Macro          | G12D           | 0.043                  | 0.0065         |                        |                | Wildtype |              |
| C_108   | OMA36     | OMA       | Ovary (NS)          | Macro          | G12R           | 0*                     | 0*             |                        |                | Wildtype |              |
| C_108   | OMA36     | OMA       | Ovary (NS)          | Macro          | G12V           | 0.0020                 | 0*             |                        |                | Wildtype |              |
| C_108   | OMA36     | OMA       | Ovary (NS)          | Macro          | G12A           | 0*                     | 0*             |                        |                | Wildtype |              |
| C_108   | OMA36     | OMA       | Ovary (NS)          | Macro          | G12S           | 0.031                  | 0.0033         |                        |                | Wildtype |              |
| C_109   | DIE70     | DIE       | Cul-de-sac (L)      | Macro          | G12C           | 0.24                   | 0.17           |                        |                | Wildtype |              |
| C_109   | DIE70     | DIE       | Cul-de-sac (L)      | Macro          | G12D           | 0.24                   | 0.17           | 0.35                   | 0.39           | Mutant   | G12D         |
| C_109   | DIE70     | DIE       | Cul-de-sac (L)      | Macro          | G12R           | 0.0048                 | 0*             |                        |                | Wildtype |              |
| C_109   | DIE70     | DIE       | Cul-de-sac (L)      | Macro          | G12V           | 0.0060                 | 0*             |                        |                | Wildtype |              |
| C_109   | DIE70     | DIE       | Cul-de-sac (L)      | Macro          | G12A           | 0*                     | 0*             |                        |                | Wildtype |              |
| C_109   | DIE70     | DIE       | Cul-de-sac (L)      | Macro          | G12S           | 0.23                   | 0.21           | 0.67                   | 0.45           | Wildtype |              |
| C_109   | OMA37     | OMA       | Ovary (L)           | Macro          | G12C           | 0*                     | 0*             |                        |                | Wildtype |              |
| C_109   | OMA37     | OMA       | Ovary (L)           | Macro          | G12D           | 0.043                  | 0.063          | 1.5                    | 0.76           | Wildtype |              |
| C_109   | OMA37     | OMA       | Ovary (L)           | Macro          | G12R           | 0*                     | 0*             |                        |                | Wildtype |              |
| C_109   | OMA37     | OMA       | Ovary (L)           | Macro          | G12V           | 0.0020                 | 0.027          | 0.0039                 | 0*             | Wildtype |              |
| C_109   | OMA37     | OMA       | Ovary (L)           | Macro          | G12A           | 0*                     | 0.43           | 0.0022                 | 3.7            | Mutant   | G12A         |
| C_109   | OMA37     | OMA       | Ovary (L)           | Macro          | G12S           | 0.031                  | 0.077          | 0.78                   | 0.43           | Wildtype |              |
| C_110   | SUP38     | SUP       | Cul-de-sac          | Macro          | G12C           | 0.0049                 | 0*             |                        |                | Wildtype |              |
| C_110   | SUP38     | SUP       | Cul-de-sac          | Macro          | G12D           | 0.012                  | 0.0036         |                        |                | Wildtype |              |
| C_110   | SUP38     | SUP       | Cul-de-sac          | Macro          | G12R           | 0.0020                 | 0*             |                        |                | Wildtype |              |
| C_110   | SUP38     | SUP       | Cul-de-sac          | Macro          | G12V           | 0.0078                 | 0.0035         | 0.0097                 | 0.0088         | Wildtype |              |
| C_110   | SUP38     | SUP       | Cul-de-sac          | Macro          | G12A           | 0.014                  | 0*             |                        |                | Wildtype |              |

| Case ID | Sample ID | Endo type | Anatomical Location | Enrich. method | Variant tested | Multi. cut-off VAF (%) | Multi. VAF (%) | Indiv. cut-off VAF (%) | Indiv. VAF (%) | Result   | KRAS Variant |
|---------|-----------|-----------|---------------------|----------------|----------------|------------------------|----------------|------------------------|----------------|----------|--------------|
| C_110   | SUP38     | SUP       | Cul-de-sac          | Macro          | G12S           | 0.035                  | 0.0073         |                        |                | Wildtype |              |
| C_111   | SUP109    | SUP       | Uterosacral (L)     | Macro          | G12C           | 0.0058                 | 0*             |                        |                | Wildtype |              |
| C_111   | SUP109    | SUP       | Uterosacral (L)     | Macro          | G12D           | 0.084                  | 0.083          | 0.98                   | 0.31           | Wildtype |              |
| C_111   | SUP109    | SUP       | Uterosacral (L)     | Macro          | G12R           | 0*                     | 0*             |                        |                | Wildtype |              |
| C_111   | SUP109    | SUP       | Uterosacral (L)     | Macro          | G12V           | 0.0036                 | 0.0052         | 0.0053                 | 0.017          | Mutant   | G12V         |
| C_111   | SUP109    | SUP       | Uterosacral (L)     | Macro          | G12A           | 0.0022                 | 0*             |                        |                | Wildtype |              |
| C_111   | SUP109    | SUP       | Uterosacral (L)     | Macro          | G12S           | 0.046                  | 0.20           | 0.90                   | 0.72           | Wildtype |              |
| C_111   | SUP39     | SUP       | Cul-de-sac (R)      | Macro          | G12C           | 0*                     | 0*             |                        |                | Wildtype |              |
| C_111   | SUP39     | SUP       | Cul-de-sac (R)      | Macro          | G12D           | 0.019                  | 0.18           | 0.99                   | 0.51           | Wildtype |              |
| C_111   | SUP39     | SUP       | Cul-de-sac (R)      | Macro          | G12R           | 0*                     | 0*             |                        |                | Wildtype |              |
| C_111   | SUP39     | SUP       | Cul-de-sac (R)      | Macro          | G12V           | 0.0016                 | 0*             |                        |                | Wildtype |              |
| C_111   | SUP39     | SUP       | Cul-de-sac (R)      | Macro          | G12A           | 0.0016                 | 0*             |                        |                | Wildtype |              |
| C_111   | SUP39     | SUP       | Cul-de-sac (R)      | Macro          | G12S           | 0.030                  | 0.42           | 1.0                    | 0.61           | Wildtype |              |
| C_112   | SUP110    | SUP       | Cul-de-sac (R)      | Macro          | G12C           | 0.0058                 | 0*             |                        |                | Wildtype |              |
| C_112   | SUP110    | SUP       | Cul-de-sac (R)      | Macro          | G12D           | 0.084                  | 0.019          |                        |                | Wildtype |              |
| C_112   | SUP110    | SUP       | Cul-de-sac (R)      | Macro          | G12R           | 0*                     | 0*             |                        |                | Wildtype |              |
| C_112   | SUP110    | SUP       | Cul-de-sac (R)      | Macro          | G12V           | 0.0036                 | 0.0083         | 0.0053                 | 0.0036         | Wildtype |              |
| C_112   | SUP110    | SUP       | Cul-de-sac (R)      | Macro          | G12A           | 0.0022                 | 0*             |                        |                | Wildtype |              |
| C_112   | SUP110    | SUP       | Cul-de-sac (R)      | Macro          | G12S           | 0.046                  | 0.069          | 0.90                   | 0.52           | Wildtype |              |
| C_112   | SUP45     | SUP       | Pelvic sidewall (L) | Macro          | G12C           | 0*                     | 0*             |                        |                | Wildtype |              |
| C_112   | SUP45     | SUP       | Pelvic sidewall (L) | Macro          | G12D           | 0.019                  | 0.018          |                        |                | Wildtype |              |
| C_112   | SUP45     | SUP       | Pelvic sidewall (L) | Macro          | G12R           | 0*                     | 0*             |                        |                | Wildtype |              |
| C_112   | SUP45     | SUP       | Pelvic sidewall (L) | Macro          | G12V           | 0.0016                 | 0*             |                        |                | Wildtype |              |
| C_112   | SUP45     | SUP       | Pelvic sidewall (L) | Macro          | G12A           | 0.0016                 | 0*             |                        |                | Wildtype |              |
| C_112   | SUP45     | SUP       | Pelvic sidewall (L) | Macro          | G12S           | 0.030                  | 0.095          | 1.0                    | 0.35           | Wildtype |              |
| C_113   | DIE71     | DIE       | Appendix            | Macro          | G12C           | 0.24                   | 0*             |                        |                | Wildtype |              |
| C_113   | DIE71     | DIE       | Appendix            | Macro          | G12D           | 0.24                   | 0*             |                        |                | Wildtype |              |
| C_113   | DIE71     | DIE       | Appendix            | Macro          | G12R           | 0.0048                 | 0*             |                        |                | Wildtype |              |

| Case ID | Sample ID | Endo type | Anatomical Location | Enrich. method | Variant tested | Multi. cut-off VAF (%) | Multi. VAF (%) | Indiv. cut-off VAF (%) | Indiv. VAF (%) | Result   | KRAS Variant |
|---------|-----------|-----------|---------------------|----------------|----------------|------------------------|----------------|------------------------|----------------|----------|--------------|
| C_113   | DIE71     | DIE       | Appendix            | Macro          | G12V           | 0-0060                 | 0-0030         |                        |                | Wildtype |              |
| C_113   | DIE71     | DIE       | Appendix            | Macro          | G12A           | 0*                     | 0*             |                        |                | Wildtype |              |
| C_113   | DIE71     | DIE       | Appendix            | Macro          | G12S           | 0-23                   | 0-0093         |                        |                | Wildtype |              |
| C_113   | SUP111    | SUP       | Pelvic sidewall (L) | Macro          | G12C           | 0-0058                 | 0*             |                        |                | Wildtype |              |
| C_113   | SUP111    | SUP       | Pelvic sidewall (L) | Macro          | G12D           | 0-084                  | 0-0015         |                        |                | Wildtype |              |
| C_113   | SUP111    | SUP       | Pelvic sidewall (L) | Macro          | G12R           | 0*                     | 0*             |                        |                | Wildtype |              |
| C_113   | SUP111    | SUP       | Pelvic sidewall (L) | Macro          | G12V           | 0-0036                 | 0-0030         |                        |                | Wildtype |              |
| C_113   | SUP111    | SUP       | Pelvic sidewall (L) | Macro          | G12A           | 0-0022                 | 0*             |                        |                | Wildtype |              |
| C_113   | SUP111    | SUP       | Pelvic sidewall (L) | Macro          | G12S           | 0-046                  | 0-0060         |                        |                | Wildtype |              |
| C_113   | SUP40     | SUP       | Rectum (L)          | Macro          | G12C           | 0*                     | 0*             |                        |                | Wildtype |              |
| C_113   | SUP40     | SUP       | Rectum (L)          | Macro          | G12D           | 0-019                  | 0-019          | 0-99                   | 0-73           | Wildtype |              |
| C_113   | SUP40     | SUP       | Rectum (L)          | Macro          | G12R           | 0*                     | 0*             |                        |                | Wildtype |              |
| C_113   | SUP40     | SUP       | Rectum (L)          | Macro          | G12V           | 0-0016                 | 0-022          | 0-017                  | 1-5            | Mutant   | G12V         |
| C_113   | SUP40     | SUP       | Rectum (L)          | Macro          | G12A           | 0-0016                 | 0-0024         | 0-0044                 | 0-025          | Mutant   | G12A         |
| C_113   | SUP40     | SUP       | Rectum (L)          | Macro          | G12S           | 0-030                  | 0-0024         |                        |                | Wildtype |              |
| C_114   | DIE15     | DIE       | Pelvic sidewall (R) | Macro          | G12C           | 0-013                  | 0*             |                        |                | Wildtype |              |
| C_114   | DIE15     | DIE       | Pelvic sidewall (R) | Macro          | G12D           | 0-056                  | 0-0067         |                        |                | Wildtype |              |
| C_114   | DIE15     | DIE       | Pelvic sidewall (R) | Macro          | G12R           | 0*                     | 0*             |                        |                | Wildtype |              |
| C_114   | DIE15     | DIE       | Pelvic sidewall (R) | Macro          | G12V           | 0-0060                 | 0-0058         |                        |                | Wildtype |              |
| C_114   | DIE15     | DIE       | Pelvic sidewall (R) | Macro          | G12A           | 0-0060                 | 0*             |                        |                | Wildtype |              |
| C_114   | DIE15     | DIE       | Pelvic sidewall (R) | Macro          | G12S           | 0-0020                 | 0-061          | 0-67                   | 0-44           | Wildtype |              |
| C_114   | SUP41     | SUP       | Pelvic sidewall (L) | Macro          | G12C           | 0-0041                 | 0*             |                        |                | Wildtype |              |
| C_114   | SUP41     | SUP       | Pelvic sidewall (L) | Macro          | G12D           | 0-018                  | 0-16           | 0-73                   | 0-68           | Wildtype |              |
| C_114   | SUP41     | SUP       | Pelvic sidewall (L) | Macro          | G12R           | 0-0014                 | 0*             |                        |                | Wildtype |              |
| C_114   | SUP41     | SUP       | Pelvic sidewall (L) | Macro          | G12V           | 0-00070                | 0*             |                        |                | Wildtype |              |
| C_114   | SUP41     | SUP       | Pelvic sidewall (L) | Macro          | G12A           | 0*                     | 0*             |                        |                | Wildtype |              |
| C_114   | SUP41     | SUP       | Pelvic sidewall (L) | Macro          | G12S           | 0-033                  | 0-087          | 0-44                   | 0-19           | Wildtype |              |
| C_115   | DIE27     | DIE       | Uterosacral (R)     | Macro          | G12C           | 0-013                  | 0*             |                        |                | Wildtype |              |



| Case ID | Sample ID | Endo type | Anatomical Location | Enrich. method | Variant tested | Multi. cut-off VAF (%) | Multi. VAF (%) | Indiv. cut-off VAF (%) | Indiv. VAF (%) | Result   | KRAS Variant |
|---------|-----------|-----------|---------------------|----------------|----------------|------------------------|----------------|------------------------|----------------|----------|--------------|
| C_115   | DIE27     | DIE       | Uterosacral (R)     | Macro          | G12D           | 0.056                  | 0.010          |                        |                | Wildtype |              |
| C_115   | DIE27     | DIE       | Uterosacral (R)     | Macro          | G12R           | 0*                     | 0*             |                        |                | Wildtype |              |
| C_115   | DIE27     | DIE       | Uterosacral (R)     | Macro          | G12V           | 0.0060                 | 0.0042         |                        |                | Wildtype |              |
| C_115   | DIE27     | DIE       | Uterosacral (R)     | Macro          | G12A           | 0.0060                 | 0*             |                        |                | Wildtype |              |
| C_115   | DIE27     | DIE       | Uterosacral (R)     | Macro          | G12S           | 0.0020                 | 0.033          | 0.67                   | 0.26           | Wildtype |              |
| C_115   | OMA38     | OMA       | Ovary (L)           | Macro          | G12C           | 0*                     | 0.0051         | 0.030                  | 0*             | Wildtype |              |
| C_115   | OMA38     | OMA       | Ovary (L)           | Macro          | G12D           | 0.043                  | 0.092          | 1.3                    | 0.34           | Wildtype |              |
| C_115   | OMA38     | OMA       | Ovary (L)           | Macro          | G12R           | 0*                     | 0*             |                        |                | Wildtype |              |
| C_115   | OMA38     | OMA       | Ovary (L)           | Macro          | G12V           | 0.0020                 | 0.010          | 0.0039                 | 0.034          | Mutant   | G12V         |
| C_115   | OMA38     | OMA       | Ovary (L)           | Macro          | G12A           | 0*                     | 0.0051         | 0.0022                 | 0*             | Wildtype |              |
| C_115   | OMA38     | OMA       | Ovary (L)           | Macro          | G12S           | 0.031                  | 0.17           | 0.78                   | 0.42           | Wildtype |              |
| C_116   | SUP112    | SUP       | Uterosacral (L)     | Macro          | G12C           | 0.0058                 | 0*             |                        |                | Wildtype |              |
| C_116   | SUP112    | SUP       | Uterosacral (L)     | Macro          | G12D           | 0.084                  | 0*             |                        |                | Wildtype |              |
| C_116   | SUP112    | SUP       | Uterosacral (L)     | Macro          | G12R           | 0*                     | 0*             |                        |                | Wildtype |              |
| C_116   | SUP112    | SUP       | Uterosacral (L)     | Macro          | G12V           | 0.0036                 | 0.0034         | 0.0053                 | 0.0028         | Wildtype |              |
| C_116   | SUP112    | SUP       | Uterosacral (L)     | Macro          | G12A           | 0.0022                 | 0.0034         | 0.0015                 | 0.023          | Mutant   | G12A         |
| C_116   | SUP112    | SUP       | Uterosacral (L)     | Macro          | G12S           | 0.046                  | 0.0067         |                        |                | Wildtype |              |
| C_116   | SUP70     | SUP       | Pelvic sidewall (L) | Macro          | G12C           | 0*                     | 0*             |                        |                | Wildtype |              |
| C_116   | SUP70     | SUP       | Pelvic sidewall (L) | Macro          | G12D           | 0.027                  | 0*             |                        |                | Wildtype |              |
| C_116   | SUP70     | SUP       | Pelvic sidewall (L) | Macro          | G12R           | 0*                     | 0*             |                        |                | Wildtype |              |
| C_116   | SUP70     | SUP       | Pelvic sidewall (L) | Macro          | G12V           | 0*                     | 0*             |                        |                | Wildtype |              |
| C_116   | SUP70     | SUP       | Pelvic sidewall (L) | Macro          | G12A           | 0.0021                 | 0*             |                        |                | Wildtype |              |
| C_116   | SUP70     | SUP       | Pelvic sidewall (L) | Macro          | G12S           | 0.021                  | 0.0075         |                        |                | Wildtype |              |
| C_117   | DIE39     | DIE       | Uterosacral (R)     | LCM            | G12C           | 0.010                  | 0.0092         |                        |                | Wildtype |              |
| C_117   | DIE39     | DIE       | Uterosacral (R)     | LCM            | G12D           | 0.043                  | 0.35           | 0.74                   | 0.79           | Mutant   | G12D         |
| C_117   | DIE39     | DIE       | Uterosacral (R)     | LCM            | G12R           | 0.0016                 | 0*             |                        |                | Wildtype |              |
| C_117   | DIE39     | DIE       | Uterosacral (R)     | LCM            | G12V           | 0.010                  | 0.018          | 0.010                  | 0*             | Wildtype |              |
| C_117   | DIE39     | DIE       | Uterosacral (R)     | LCM            | G12A           | 0.0046                 | 0*             |                        |                | Wildtype |              |

| Case ID | Sample ID | Endo type | Anatomical Location | Enrich. method | Variant tested | Multi. cut-off VAF (%) | Multi. VAF (%) | Indiv. cut-off VAF (%) | Indiv. VAF (%) | Result   | KRAS Variant |
|---------|-----------|-----------|---------------------|----------------|----------------|------------------------|----------------|------------------------|----------------|----------|--------------|
| C_117   | DIE39     | DIE       | Uterosacral (R)     | LCM            | G12S           | 0.085                  | 0.018          |                        |                | Wildtype |              |
| C_117   | DIE40     | DIE       | Uterosacral (R)     | Macro          | G12C           | 0.34                   | 0.56           | 0.030                  | 0*             | Wildtype |              |
| C_117   | DIE40     | DIE       | Uterosacral (R)     | Macro          | G12D           | 0.24                   | 0.57           | 0.35                   | 1.0            | Mutant   | G12D         |
| C_117   | DIE40     | DIE       | Uterosacral (R)     | Macro          | G12R           | 0.0048                 | 0*             |                        |                | Wildtype |              |
| C_117   | DIE40     | DIE       | Uterosacral (R)     | Macro          | G12V           | 0.0060                 | 0*             |                        |                | Wildtype |              |
| C_117   | DIE40     | DIE       | Uterosacral (R)     | Macro          | G12A           | 0*                     | 0*             |                        |                | Wildtype |              |
| C_117   | DIE40     | DIE       | Uterosacral (R)     | Macro          | G12S           | 0.43                   | 0.023          |                        |                | Wildtype |              |
| C_117   | DIE41     | DIE       | Uterosacral (L)     | Macro          | G12C           | 0.24                   | 0.032          |                        |                | Wildtype |              |
| C_117   | DIE41     | DIE       | Uterosacral (L)     | Macro          | G12D           | 0.24                   | 0.032          |                        |                | Wildtype |              |
| C_117   | DIE41     | DIE       | Uterosacral (L)     | Macro          | G12R           | 0.0048                 | 0*             |                        |                | Wildtype |              |
| C_117   | DIE41     | DIE       | Uterosacral (L)     | Macro          | G12V           | 0.0060                 | 0*             |                        |                | Wildtype |              |
| C_117   | DIE41     | DIE       | Uterosacral (L)     | Macro          | G12A           | 0*                     | 0*             |                        |                | Wildtype |              |
| C_117   | DIE41     | DIE       | Uterosacral (L)     | Macro          | G12S           | 0.23                   | 0.053          |                        |                | Wildtype |              |
| C_117   | SUP42     | SUP       | Cul-de-sac (L)      | Macro          | G12C           | 0.0041                 | 0*             |                        |                | Wildtype |              |
| C_117   | SUP42     | SUP       | Cul-de-sac (L)      | Macro          | G12D           | 0.018                  | 0.049          | 0.73                   | 0.42           | Wildtype |              |
| C_117   | SUP42     | SUP       | Cul-de-sac (L)      | Macro          | G12R           | 0.0014                 | 0*             |                        |                | Wildtype |              |
| C_117   | SUP42     | SUP       | Cul-de-sac (L)      | Macro          | G12V           | 0.00070                | 0.022          | 0.0060                 | 0.18           | Mutant   | G12V         |
| C_117   | SUP42     | SUP       | Cul-de-sac (L)      | Macro          | G12A           | 0*                     | 0*             |                        |                | Wildtype |              |
| C_117   | SUP42     | SUP       | Cul-de-sac (L)      | Macro          | G12S           | 0.033                  | 0.022          |                        |                | Wildtype |              |
| C_118   | DIE37     | DIE       | Uterosacral         | LCM            | G12C           | 0.010                  | 0*             |                        |                | Wildtype |              |
| C_118   | DIE37     | DIE       | Uterosacral         | LCM            | G12D           | 0.043                  | 0.035          |                        |                | Wildtype |              |
| C_118   | DIE37     | DIE       | Uterosacral         | LCM            | G12R           | 0.0016                 | 0*             |                        |                | Wildtype |              |
| C_118   | DIE37     | DIE       | Uterosacral         | LCM            | G12V           | 0.010                  | 0*             |                        |                | Wildtype |              |
| C_118   | DIE37     | DIE       | Uterosacral         | LCM            | G12A           | 0.0046                 | 0*             |                        |                | Wildtype |              |
| C_118   | DIE37     | DIE       | Uterosacral         | LCM            | G12S           | 0.085                  | 0.017          |                        |                | Wildtype |              |
| C_118   | DIE38     | DIE       | Uterosacral (L)     | Macro          | G12C           | 0.24                   | 0.019          |                        |                | Wildtype |              |
| C_118   | DIE38     | DIE       | Uterosacral (L)     | Macro          | G12D           | 0.24                   | 0.019          | 0.35                   | 0.19           | Wildtype |              |
| C_118   | DIE38     | DIE       | Uterosacral (L)     | Macro          | G12R           | 0.0048                 | 0*             |                        |                | Wildtype |              |

| Case ID | Sample ID | Endo type | Anatomical Location | Enrich. method | Variant tested | Multi. cut-off VAF (%) | Multi. VAF (%) | Indiv. cut-off VAF (%) | Indiv. VAF (%) | Result   | KRAS Variant |
|---------|-----------|-----------|---------------------|----------------|----------------|------------------------|----------------|------------------------|----------------|----------|--------------|
| C_118   | DIE38     | DIE       | Uterosacral (L)     | Macro          | G12V           | 0-0060                 | 0-0042         |                        |                | Wildtype |              |
| C_118   | DIE38     | DIE       | Uterosacral (L)     | Macro          | G12A           | 0*                     | 0*             |                        |                | Wildtype |              |
| C_118   | DIE38     | DIE       | Uterosacral (L)     | Macro          | G12S           | 0-23                   | 0-0021         |                        |                | Wildtype |              |
| C_118   | OMA39     | OMA       | Ovary (L)           | Macro          | G12C           | 0*                     | 0*             |                        |                | Wildtype |              |
| C_118   | OMA39     | OMA       | Ovary (L)           | Macro          | G12D           | 0-043                  | 0-014          |                        |                | Wildtype |              |
| C_118   | OMA39     | OMA       | Ovary (L)           | Macro          | G12R           | 0*                     | 0*             |                        |                | Wildtype |              |
| C_118   | OMA39     | OMA       | Ovary (L)           | Macro          | G12V           | 0-0020                 | 0-0046         | 0-0039                 | 0-0020         | Wildtype |              |
| C_118   | OMA39     | OMA       | Ovary (L)           | Macro          | G12A           | 0*                     | 0*             |                        |                | Wildtype |              |
| C_118   | OMA39     | OMA       | Ovary (L)           | Macro          | G12S           | 0-031                  | 0-023          |                        |                | Wildtype |              |
| C_119   | DIE68     | DIE       | Bladder (L)         | Macro          | G12C           | 0-24                   | 0-040          |                        |                | Wildtype |              |
| C_119   | DIE68     | DIE       | Bladder (L)         | Macro          | G12D           | 0-24                   | 0-040          |                        |                | Wildtype |              |
| C_119   | DIE68     | DIE       | Bladder (L)         | Macro          | G12R           | 0-0048                 | 0*             |                        |                | Wildtype |              |
| C_119   | DIE68     | DIE       | Bladder (L)         | Macro          | G12V           | 0-0060                 | 0*             |                        |                | Wildtype |              |
| C_119   | DIE68     | DIE       | Bladder (L)         | Macro          | G12A           | 0*                     | 0*             |                        |                | Wildtype |              |
| C_119   | DIE68     | DIE       | Bladder (L)         | Macro          | G12S           | 0-23                   | 0-35           | 0-67                   | 0-47           | Wildtype |              |
| C_119   | DIE69     | DIE       | Bladder (L)         | Macro          | G12C           | 0-34                   | 0*             |                        |                | Wildtype |              |
| C_119   | DIE69     | DIE       | Bladder (L)         | Macro          | G12D           | 0-24                   | 0-033          |                        |                | Wildtype |              |
| C_119   | DIE69     | DIE       | Bladder (L)         | Macro          | G12R           | 0-0048                 | 0*             |                        |                | Wildtype |              |
| C_119   | DIE69     | DIE       | Bladder (L)         | Macro          | G12V           | 0-0060                 | 0*             |                        |                | Wildtype |              |
| C_119   | DIE69     | DIE       | Bladder (L)         | Macro          | G12A           | 0*                     | 0*             |                        |                | Wildtype |              |
| C_119   | DIE69     | DIE       | Bladder (L)         | Macro          | G12S           | 0-23                   | 0-033          |                        |                | Wildtype |              |
| C_119   | OMA40     | OMA       | Ovary (L)           | Macro          | G12C           | 0*                     | 0*             |                        |                | Wildtype |              |
| C_119   | OMA40     | OMA       | Ovary (L)           | Macro          | G12D           | 0-043                  | 0-37           | 1-3                    | 0-39           | Wildtype |              |
| C_119   | OMA40     | OMA       | Ovary (L)           | Macro          | G12R           | 0*                     | 0*             |                        |                | Wildtype |              |
| C_119   | OMA40     | OMA       | Ovary (L)           | Macro          | G12V           | 0-0020                 | 0*             |                        |                | Wildtype |              |
| C_119   | OMA40     | OMA       | Ovary (L)           | Macro          | G12A           | 0*                     | 0-010          | 0-0022                 | 0*             | Wildtype |              |
| C_119   | OMA40     | OMA       | Ovary (L)           | Macro          | G12S           | 0-031                  | 0-23           | 0-78                   | 0-59           | Wildtype |              |
| C_119   | SUP113    | SUP       | Cul-de-sac (L)      | Macro          | G12C           | 0-0058                 | 0*             |                        |                | Wildtype |              |

| Case ID | Sample ID | Endo type | Anatomical Location | Enrich. method | Variant tested | Multi. cut-off VAF (%) | Multi. VAF (%) | Indiv. cut-off VAF (%) | Indiv. VAF (%) | Result   | KRAS Variant |
|---------|-----------|-----------|---------------------|----------------|----------------|------------------------|----------------|------------------------|----------------|----------|--------------|
| C_119   | SUP113    | SUP       | Cul-de-sac (L)      | Macro          | G12D           | 0.084                  | 0.058          | 0.98                   | 0.24           | Wildtype |              |
| C_119   | SUP113    | SUP       | Cul-de-sac (L)      | Macro          | G12R           | 0*                     | 0*             |                        |                | Wildtype |              |
| C_119   | SUP113    | SUP       | Cul-de-sac (L)      | Macro          | G12V           | 0.0036                 | 0*             |                        |                | Wildtype |              |
| C_119   | SUP113    | SUP       | Cul-de-sac (L)      | Macro          | G12A           | 0.0022                 | 0*             |                        |                | Wildtype |              |
| C_119   | SUP113    | SUP       | Cul-de-sac (L)      | Macro          | G12S           | 0.046                  | 0.13           | 0.90                   | 0.66           | Wildtype |              |
| C_119   | SUP71     | SUP       | Pelvic sidewall (R) | Macro          | G12C           | 0*                     | 0*             |                        |                | Wildtype |              |
| C_119   | SUP71     | SUP       | Pelvic sidewall (R) | Macro          | G12D           | 0.027                  | 0.0042         |                        |                | Wildtype |              |
| C_119   | SUP71     | SUP       | Pelvic sidewall (R) | Macro          | G12R           | 0*                     | 0*             |                        |                | Wildtype |              |
| C_119   | SUP71     | SUP       | Pelvic sidewall (R) | Macro          | G12V           | 0*                     | 0.0087         | 0.0065                 | 0*             | Wildtype |              |
| C_119   | SUP71     | SUP       | Pelvic sidewall (R) | Macro          | G12A           | 0.0021                 | 0*             |                        |                | Wildtype |              |
| C_119   | SUP71     | SUP       | Pelvic sidewall (R) | Macro          | G12S           | 0.021                  | 0.0022         |                        |                | Wildtype |              |
| C_120   | SUP43     | SUP       | Cul-de-sac (L)      | Macro          | G12C           | 0*                     | 0*             |                        |                | Wildtype |              |
| C_120   | SUP43     | SUP       | Cul-de-sac (L)      | Macro          | G12D           | 0.019                  | 0.060          | 0.99                   | 0.32           | Wildtype |              |
| C_120   | SUP43     | SUP       | Cul-de-sac (L)      | Macro          | G12R           | 0*                     | 0*             |                        |                | Wildtype |              |
| C_120   | SUP43     | SUP       | Cul-de-sac (L)      | Macro          | G12V           | 0.0016                 | 0*             |                        |                | Wildtype |              |
| C_120   | SUP43     | SUP       | Cul-de-sac (L)      | Macro          | G12A           | 0.0016                 | 0*             |                        |                | Wildtype |              |
| C_120   | SUP43     | SUP       | Cul-de-sac (L)      | Macro          | G12S           | 0.030                  | 0.030          | 1.0                    | 0.13           | Wildtype |              |
| C_121   | DIE11     | DIE       | Fallopian tube (L)  | Macro          | G12C           | 0.34                   | 1.2            | 0.030                  | 0*             | Wildtype |              |
| C_121   | DIE11     | DIE       | Fallopian tube (L)  | Macro          | G12D           | 0.34                   | 1.2            | 0.35                   | 1.7            | Mutant   | G12D         |
| C_121   | DIE11     | DIE       | Fallopian tube (L)  | Macro          | G12R           | 0.0048                 | 0*             |                        |                | Wildtype |              |
| C_121   | DIE11     | DIE       | Fallopian tube (L)  | Macro          | G12V           | 0.0060                 | 0*             |                        |                | Wildtype |              |
| C_121   | DIE11     | DIE       | Fallopian tube (L)  | Macro          | G12A           | 0*                     | 0*             |                        |                | Wildtype |              |
| C_121   | DIE11     | DIE       | Fallopian tube (L)  | Macro          | G12S           | 0.43                   | 1.5            | 0.67                   | 1.7            | Mutant   | G12S         |
| C_121   | DIE12     | DIE       | Uterosacral (L)     | Macro          | G12C           | 0.24                   | 0.12           |                        |                | Wildtype |              |
| C_121   | DIE12     | DIE       | Uterosacral (L)     | Macro          | G12D           | 0.24                   | 0.12           | 0.35                   | 0.39           | Mutant   | G12D         |
| C_121   | DIE12     | DIE       | Uterosacral (L)     | Macro          | G12R           | 0.0048                 | 0*             |                        |                | Wildtype |              |
| C_121   | DIE12     | DIE       | Uterosacral (L)     | Macro          | G12V           | 0.0060                 | 0*             |                        |                | Wildtype |              |
| C_121   | DIE12     | DIE       | Uterosacral (L)     | Macro          | G12A           | 0*                     | 0*             |                        |                | Wildtype |              |

| Case ID | Sample ID | Endo type | Anatomical Location | Enrich. method | Variant tested | Multi. cut-off VAF (%) | Multi. VAF (%) | Indiv. cut-off VAF (%) | Indiv. VAF (%) | Result   | KRAS Variant |
|---------|-----------|-----------|---------------------|----------------|----------------|------------------------|----------------|------------------------|----------------|----------|--------------|
| C_121   | DIE12     | DIE       | Uterosacral (L)     | Macro          | G12S           | 0.23                   | 0.019          |                        |                | Wildtype |              |
| C_121   | DIE13     | DIE       | Uterosacral (L)     | Macro          | G12C           | 0.24                   | 0.071          |                        |                | Wildtype |              |
| C_121   | DIE13     | DIE       | Uterosacral (L)     | Macro          | G12D           | 0.24                   | 0.071          | 0.35                   | 0.44           | Mutant   | G12D         |
| C_121   | DIE13     | DIE       | Uterosacral (L)     | Macro          | G12R           | 0.0048                 | 0*             |                        |                | Wildtype |              |
| C_121   | DIE13     | DIE       | Uterosacral (L)     | Macro          | G12V           | 0.0060                 | 0*             |                        |                | Wildtype |              |
| C_121   | DIE13     | DIE       | Uterosacral (L)     | Macro          | G12A           | 0*                     | 0*             |                        |                | Wildtype |              |
| C_121   | DIE13     | DIE       | Uterosacral (L)     | Macro          | G12S           | 0.23                   | 0.034          |                        |                | Wildtype |              |
| C_121   | DIE14     | DIE       | Cul-de-sac          | LCM            | G12C           | 0.010                  | 0*             |                        |                | Wildtype |              |
| C_121   | DIE14     | DIE       | Cul-de-sac          | LCM            | G12D           | 0.043                  | 0.0024         |                        |                | Wildtype |              |
| C_121   | DIE14     | DIE       | Cul-de-sac          | LCM            | G12R           | 0.0016                 | 0*             |                        |                | Wildtype |              |
| C_121   | DIE14     | DIE       | Cul-de-sac          | LCM            | G12V           | 0.010                  | 0*             |                        |                | Wildtype |              |
| C_121   | DIE14     | DIE       | Cul-de-sac          | LCM            | G12A           | 0.0046                 | 0*             |                        |                | Wildtype |              |
| C_121   | DIE14     | DIE       | Cul-de-sac          | LCM            | G12S           | 0.085                  | 0.0024         |                        |                | Wildtype |              |
| C_121   | OMA41     | OMA       | Ovary (L)           | Macro          | G12C           | 0*                     | 0*             |                        |                | Wildtype |              |
| C_121   | OMA41     | OMA       | Ovary (L)           | Macro          | G12D           | 0.043                  | 0.0029         |                        |                | Wildtype |              |
| C_121   | OMA41     | OMA       | Ovary (L)           | Macro          | G12R           | 0*                     | 0*             |                        |                | Wildtype |              |
| C_121   | OMA41     | OMA       | Ovary (L)           | Macro          | G12V           | 0.0020                 | 0.0014         |                        |                | Wildtype |              |
| C_121   | OMA41     | OMA       | Ovary (L)           | Macro          | G12A           | 0*                     | 0*             |                        |                | Wildtype |              |
| C_121   | OMA41     | OMA       | Ovary (L)           | Macro          | G12S           | 0.031                  | 0.0030         |                        |                | Wildtype |              |
| C_122   | SUP44     | SUP       | Cul-de-sac          | Macro          | G12C           | 0*                     | 0*             |                        |                | Wildtype |              |
| C_122   | SUP44     | SUP       | Cul-de-sac          | Macro          | G12D           | 0.019                  | 0*             |                        |                | Wildtype |              |
| C_122   | SUP44     | SUP       | Cul-de-sac          | Macro          | G12R           | 0*                     | 0*             |                        |                | Wildtype |              |
| C_122   | SUP44     | SUP       | Cul-de-sac          | Macro          | G12V           | 0.0016                 | 0*             |                        |                | Wildtype |              |
| C_122   | SUP44     | SUP       | Cul-de-sac          | Macro          | G12A           | 0.0016                 | 0*             |                        |                | Wildtype |              |
| C_122   | SUP44     | SUP       | Cul-de-sac          | Macro          | G12S           | 0.030                  | 0.0088         |                        |                | Wildtype |              |

\* indicates true zeros (0). i.e., no mutant droplets were present. Enrich.=enrichment; Multi.=multiplex; Indiv.=individual; DIE=deep infiltrating endometriosis; OMA=endometrioma; SUP=superficial; L=left; R=right; A=anterior; P=posterior; B=bilateral; NS=non-specific; Macro>manual needle microdissection; LCM=laser capture microdissection.

**Table S6. The association between follow-up pain scores and *KRAS* mutation status, controlling for baseline pain severity - linear regression.**

| Predictors                              | Unstandardized B | Lower | Upper | P value |
|-----------------------------------------|------------------|-------|-------|---------|
| <b>Dysmenorrhea at follow-up</b>        |                  |       |       |         |
| <i>KRAS</i> mutation present            | 0.74             | -0.78 | 2.27  | 0.33    |
| Dysmenorrhea at baseline                | 0.28             | -0.10 | 0.58  | <0.001  |
| <b>Deep Dyspareunia at follow-up</b>    |                  |       |       |         |
| <i>KRAS</i> mutation present            | -0.17            | -1.45 | 1.11  | 0.79    |
| Deep dyspareunia at baseline            | 0.42             | 0.22  | 0.61  | <0.001  |
| <b>Dyschezia at follow-up</b>           |                  |       |       |         |
| <i>KRAS</i> mutation present            | -0.40            | -1.31 | 0.51  | 0.38    |
| Dyschezia at baseline                   | 0.35             | 0.22  | 0.49  | <0.001  |
| <b>Chronic Pelvic Pain at follow-up</b> |                  |       |       |         |
| <i>KRAS</i> mutation present            | -0.21            | -1.45 | 1.021 | 0.73    |
| Chronic pelvic pain at baseline         | 0.31             | 0.082 | 0.54  | 0.008   |

Linear regression for each pain type at follow-up, showed that baseline pain score was as a significant predictor, but not *KRAS* mutation.
